# Supplementary material
Source: ML conference proceedings conference paper supplement (https://openreview.net/forum?id=cc_AXK6rWPJ)
Supplement: supplementary_material [file attachment]

---

# Stochastic Shortest Path: Minimax, Parameter-Free and Towards Horizon-Free Regret

---

**Jean Tarbouriech\***

Facebook AI Research & Inria Lille  
jean.tarbouriech@gmail.com

**Runlong Zhou\***

Tsinghua University  
zhourunlongvector@gmail.com

**Simon S. Du**

University of Washington & Facebook AI Research  
ssdu@cs.washington.edu

**Matteo Pirotta**

Facebook AI Research Paris  
pirotta@fb.com

**Michal Valko**

DeepMind Paris  
valkom@deepmind.com

**Alessandro Lazaric**

Facebook AI Research Paris  
lazaric@fb.com

## Abstract

We study the problem of learning in the stochastic shortest path (SSP) setting, where an agent seeks to minimize the expected cost accumulated before reaching a goal state. We design a novel model-based algorithm EB-SSP that carefully skews the empirical transitions and perturbs the empirical costs with an exploration bonus to induce an optimistic SSP problem whose associated value iteration scheme is guaranteed to converge. We prove that EB-SSP achieves the minimax regret rate  $\tilde{O}(B_*\sqrt{SAK})$ , where  $K$  is the number of episodes,  $S$  is the number of states,  $A$  is the number of actions, and  $B_*$  bounds the expected cumulative cost of the optimal policy from any state, thus closing the gap with the lower bound. Interestingly, EB-SSP obtains this result while being parameter-free, i.e., it does not require any prior knowledge of  $B_*$ , nor of  $T_*$ , which bounds the expected time-to-goal of the optimal policy from any state. Furthermore, we illustrate various cases (e.g., positive costs, or general costs when an order-accurate estimate of  $T_*$  is available) where the regret only contains a logarithmic dependence on  $T_*$ , thus yielding the first (nearly) horizon-free regret bound beyond the finite-horizon MDP setting.

## 1 Introduction

Stochastic shortest path (SSP) is a goal-oriented reinforcement learning (RL) setting where the agent aims to reach a predefined goal state while minimizing its total expected cost [Bertsekas, 1995]. In particular, the interaction between the agent and the environment ends *only* when (and if) the goal state is reached, so the length of an episode is not predetermined (nor bounded) and it is influenced by the agent’s behavior. SSP includes both finite-horizon and discounted Markov Decision Processes (MDPs) as special cases. Moreover, many common RL problems can be cast under the SSP formulation, such as game playing (e.g., Atari games) or navigation (e.g., Mujoco mazes).

We study the online learning problem in the SSP setting (online SSP in short), where both the transition dynamics and the cost function are initially unknown and the agent interacts with the environment through multiple episodes. The learning objective is to achieve a performance as close

---

\*equal contribution

as possible to the optimal policy  $\pi^*$ , that is, the agent should achieve low *regret* (i.e., the cumulative difference between the total cost accumulated across episodes by the agent and by the optimal policy). We identify three desirable properties for a learning algorithm in online SSP.

- **Desired property 1: Minimax.** The information-theoretic lower bound on the regret is  $\Omega(B_*\sqrt{SAK})$  [Rosenberg et al., 2020], where  $K$  is the number of episodes,  $S$  is the number of states,  $A$  is the number of actions, and  $B_*$  bounds the total expected cost of the optimal policy starting from any state (assuming for simplicity that  $B_* \geq 1$ ).

*An algorithm for online SSP is (nearly) minimax optimal if its regret is bounded by  $\tilde{O}(B_*\sqrt{SAK})$ , up to logarithmic factors and lower-order terms.*

- **Desired property 2: Parameter-free.** Another relevant dimension is the amount of prior knowledge required by the algorithm. While the knowledge of  $S$ ,  $A$ , and the cost (or reward) range  $[0, 1]$  is standard across regret-minimization settings (e.g., finite-horizon, discounted, average-reward), the complexity of learning in SSP problems may be linked to SSP-specific quantities such as  $B_*$  and  $T_*$ , which denotes the expected time-to-goal of the optimal policy from any state.

*An algorithm for online SSP is parameter-free if it relies neither on  $T_*$  nor  $B_*$  prior knowledge.*

- **Desired property 3: Horizon-free.** A core challenge in SSP is to trade off between minimizing costs and quickly reaching the goal state. This is accentuated when the instantaneous costs are small, i.e., when there is a mismatch between  $B_*$  and  $T_*$ . Indeed, while  $B_* \leq T_*$  always holds since the cost range is  $[0, 1]$ , the gap between the two may be arbitrarily large (see e.g., the simple example of App. A). The lower bound stipulates that the regret does depend on  $B_*$ , while the “time horizon” of the problem, i.e.,  $T_*$  should a priori not impact the regret, even as a lower-order term.

*An algorithm for online SSP is (nearly) horizon-free if its regret depends only logarithmically on  $T_*$ .*

Our definition extends the property of so-called horizon-free bounds recently uncovered in finite-horizon MDPs with total reward bounded by 1 [Wang et al., 2020a, Zhang et al., 2021a,b]. These bounds depend only logarithmically on the horizon  $H$ , which is the number of time steps by which *any* policy terminates. Such notion of horizon would clearly be too strong in the more general class of SSP, where some (even most) policies may never reach the goal, thus having unbounded time horizon. A more adequate notion of horizon in SSP is  $T_*$ , which bounds the *expected* time of the *optimal* policy to terminate the episode starting from any state.

Finally, while the previous properties focus on the learning aspects of the algorithm, another important consideration is computational efficiency. It is desirable that a learning algorithm has run-time complexity at most polynomial in  $K, S, A, B_*$ , and  $T_*$ . All existing algorithms for online SSP, including the one proposed in this paper, meet such requirement.

**Related Work.** Table 1 reviews the existing work on online learning in SSP. The setting was first studied by Tarbouriech et al. [2020a] who gave a parameter-free algorithm with a  $\tilde{O}(K^{3/2})$  regret guarantee. Rosenberg et al. [2020] then improved this result by deriving the first order-optimal algorithm with regret  $\tilde{O}(B_*^{3/2}S\sqrt{AK})$  in the parameter-free case and  $\tilde{O}(B_*S\sqrt{AK})$  if  $B_*$  is known (to tune cost perturbation appropriately). Both approaches are model-optimistic,<sup>2</sup> drawing inspiration from the ideas behind the UCRL2 algorithm [Jaksch et al., 2010] for average-reward MDPs.

Concurrently to our work, Cohen et al. [2021] propose an algorithm for online SSP based on a black-box reduction from SSP to finite-horizon MDPs. It successively tackles finite-horizon problems with horizon set to  $H = \Omega(T_*)$  and costs augmented by a terminal cost set to  $c_H(s) = \Omega(B_*\mathbb{I}(s \neq g))$ , where  $g$  denotes the goal state. This finite-horizon construction guarantees that its optimal policy has a similar value function to the optimal policy in the original SSP instance up to a lower-order bias. Their algorithm comes with a regret bound of  $O(B_*\sqrt{SAKL} + T_*^4S^2AL^5)$ , with  $L = \log(KT_*SA\delta^{-1})$  (with probability at least  $1 - \delta$ ). It achieves a nearly minimax-optimal rate, however it relies on both  $T_*$  and  $B_*$  prior knowledge to tune the horizon and terminal cost in the reduction, respectively.<sup>3</sup>

<sup>2</sup>We refer the reader to Neu and Pike-Burke [2020] for details on the differences and interplay between model-optimistic and value-optimistic approaches.

<sup>3</sup>As mentioned by Cohen et al. [2021, Remark 2], in the case of positive costs lower bounded by  $c_{\min} > 0$ , their knowledge of  $T_*$  can be bypassed by replacing it with the upper bound  $T_* \leq B_*/c_{\min}$ . However, when generalizing from the  $c_{\min}$  case to general costs with a perturbation argument, their regret guarantee worsens from  $\tilde{O}(\sqrt{K} + c_{\min}^{-4})$  to  $\tilde{O}(K^{4/5})$ , because of the poor additive dependence on  $c_{\min}^{-1}$ .

| Algorithm                                 | Regret                                                              | Minimax    | Parameters  | Horizon-Free |
|-------------------------------------------|---------------------------------------------------------------------|------------|-------------|--------------|
| [Tarbouriech et al., 2020a]               | $\tilde{O}_K(K^{2/3})$                                              | No         | None        | No           |
| [Rosenberg et al., 2020]                  | $\tilde{O}(B_*S\sqrt{AK} + T_*^{3/2}S^2A)$                          | No         | $B_*$       | No           |
|                                           | $\tilde{O}(B_*^{3/2}S\sqrt{AK} + T_*B_*S^2A)$                       | No         | None        | No           |
| [Cohen et al., 2021]<br>(concurrent work) | $\tilde{O}(B_*\sqrt{SAK} + T_*^4S^2A)$                              | Yes        | $B_*, T_*$  | No           |
| This work                                 | $\tilde{O}(B_*\sqrt{SAK} + B_*S^2A)$                                | <b>Yes</b> | $B_*, T_*$  | <b>Yes</b>   |
|                                           | $\tilde{O}(B_*\sqrt{SAK} + B_*S^2A + \frac{T_*}{\text{poly}(K)})$   | <b>Yes</b> | $B_*$       | No*          |
|                                           | $\tilde{O}(B_*\sqrt{SAK} + B_*^3S^3A)$                              | <b>Yes</b> | $T_*$       | <b>Yes</b>   |
|                                           | $\tilde{O}(B_*\sqrt{SAK} + B_*^3S^3A + \frac{T_*}{\text{poly}(K)})$ | <b>Yes</b> | <b>None</b> | No*          |
| Lower Bound                               | $\Omega(B_*\sqrt{SAK})$                                             | -          | -           | -            |

Table 1: Regret comparisons of algorithms for online SSP (we assume for simplicity that  $B_* \geq 1$ ). The notation  $\tilde{O}$  omits logarithmic factors and  $\tilde{O}_K$  only reports the dependence in  $K$ . **Regret** is the performance metric of Eq. 1. **Minimax**: Whether the regret matches the  $\Omega(B_*\sqrt{SAK})$  lower bound [Rosenberg et al., 2020], up to logarithmic and lower-order terms. **Parameters**: The parameters that the algorithm requires as input: either both  $B_*$  and  $T_*$ , or one of them, or none (i.e., parameter-free). **Horizon-Free**: Whether the regret bound depends only logarithmically on  $T_*$ . \*If  $K$  is known in advance, the additive term  $T_*/\text{poly}(K)$  has a denominator that is polynomial in  $K$ , so it becomes negligible for large values of  $K$  (if  $K$  is unknown, the additive term is  $T_*$ ). See Sect. 4 for the full statements of our bounds.

Finally, all existing bounds contain lower-order dependencies either on  $T_*$  in the case of general costs, or on  $B_*/c_{\min}$  in the case of positive costs lower bounded by  $c_{\min} > 0$  (note that  $T_* \leq B_*/c_{\min}$ , which is one of the reasons why  $c_{\min}$  can show up in existing bounds). As such, no existing analysis satisfies horizon-free properties for online SSP.

**Contributions.** We summarize our main contributions as follows (see also Table 1):

- We propose EB-SSP (Exploration Bonus for SSP), a new algorithm for online SSP. It introduces a value-optimistic scheme to efficiently compute optimistic policies for SSP, by both perturbing the empirical costs with an exploration bonus and slightly biasing the empirical transitions towards reaching the goal from *each* state-action pair with positive probability. Under these biased transitions, *all* policies are in fact proper (i.e., they eventually reach the goal with probability 1 starting from any state). We decay the bias over time in a way that it only contributes to a lower-order regret term. See Sect. 3 for an overview of our algorithm and analysis. Note that EB-SSP is *not* based on a model-optimistic approach<sup>2</sup> [Tarbouriech et al., 2020a, Rosenberg et al., 2020], and it does *not* rely on a reduction from SSP to finite-horizon [Cohen et al., 2021] (i.e., we operate at the level of the non-truncated SSP model);
- EB-SSP is the first algorithm to achieve the **minimax** regret rate of  $\tilde{O}(B_*\sqrt{SAK})$  while simultaneously being **parameter-free**: it does not require to know nor estimate  $T_*$ , and it is able to bypass the knowledge of  $B_*$  at the cost of only logarithmic and lower-order contributions to the regret;
- EB-SSP is the first algorithm to achieve **horizon-free** regret for SSP in various cases: i) positive costs, ii) no almost-sure zero-cost cycles, and iii) the general cost case when an order-accurate estimate of  $T_*$  is available (i.e., a value  $\bar{T}_*$  such that  $\frac{T_*}{v} \leq \bar{T}_* \leq \lambda T_*^\zeta$  for some unknown constants  $v, \lambda, \zeta \geq 1$  is available). This property is especially relevant if  $T_*$  is much larger than  $B_*$ , which can occur in SSP models with very small instantaneous costs. Moreover, EB-SSP achieves its horizon-free guarantees while maintaining the minimax rate. For instance, under general costs when

relying on  $T_*$  and  $B_*$ , its regret is  $\tilde{O}(B_*\sqrt{SAK} + B_*S^2A)$ .<sup>4</sup> To the best of our knowledge, EB-SSP yields the first set of (nearly) horizon-free bounds beyond the setting of finite-horizon MDPs.

**Additional Related Work.** *Planning in SSP:* Early work by Bertsekas and Tsitsiklis [1991], followed by [e.g., Bertsekas, 1995, Bonet, 2007, Kolobov et al., 2011, Bertsekas and Yu, 2013, Guillot and Stauffer, 2020], examine the planning problem in SSP, i.e., how to compute an optimal policy when all parameters of the SSP model are known. Under mild assumptions, the optimal policy is deterministic and stationary and can be computed efficiently using standard planning techniques, e.g., value iteration, policy iteration or linear programming.

*Regret minimization in MDPs:* The exploration-exploitation dilemma in tabular MDPs has been extensively studied in finite-horizon [e.g., Azar et al., 2017, Jin et al., 2018, Zanette and Brunskill, 2019, Efroni et al., 2019, Simchowitz and Jamieson, 2019, Zhang et al., 2020, Neu and Pike-Burke, 2020, Xu et al., 2021, Menard et al., 2021] and infinite-horizon [e.g., Jaksch et al., 2010, Bartlett and Tewari, 2012, Fruit et al., 2018, Wang et al., 2020b, Qian et al., 2019, Wei et al., 2020].

*Other SSP-based settings:* SSP with adversarial costs was investigated by Rosenberg and Mansour [2021], Chen et al. [2021], Chen and Luo [2021].<sup>5</sup> Tarbouriech et al. [2021] study the sample complexity of SSP with a generative model, as a standard regret-to-PAC conversion may not hold in SSP (as opposed to finite-horizon). Exploration problems involving multiple goal states (i.e., multi-goal SSP or goal-conditioned RL) were analyzed by Lim and Auer [2012], Tarbouriech et al. [2020b].

## 2 Preliminaries

An SSP problem is an MDP  $M := \langle \mathcal{S}, \mathcal{A}, P, c, s_0, g \rangle$ , where  $\mathcal{S}$  is the finite state space with cardinality  $S$ ,  $\mathcal{A}$  is the finite action space with cardinality  $A$ , and  $s_0 \in \mathcal{S}$  is the initial state. We denote by  $g \notin \mathcal{S}$  the goal state, and we set  $\mathcal{S}' := \mathcal{S} \cup \{g\}$  (thus  $S' := S + 1$ ). Taking action  $a$  in state  $s$  incurs a cost drawn i.i.d. from a distribution on  $[0, 1]$  with expectation  $c(s, a)$ , and the next state  $s' \in \mathcal{S}'$  is selected with probability  $P(s'|s, a)$  (where  $\sum_{s' \in \mathcal{S}'} P(s'|s, a) = 1$ ). The goal state  $g$  is absorbing and zero-cost, i.e.,  $P(g|g, a) = 1$  and  $c(g, a) = 0$  for any action  $a$ .

For notational convenience, let  $P_{s,a} := P(\cdot|s, a)$ ,  $P_{s,a,s'} := P(s'|s, a)$ . For any two vectors  $X, Y$  of size  $S'$ , we write their inner product as  $XY := \sum_{s \in \mathcal{S}'} X(s)Y(s)$ , we denote by  $X^2$  the vector  $[X(1)^2, X(2)^2, \dots, X(S')^2]^\top$ , let  $\|X\|_\infty := \max_{s \in \mathcal{S}'} |X(s)|$ ,  $\|X\|_\infty^{\neq g} := \max_{s \in \mathcal{S}} |X(s)|$ , and if  $X$  is a probability distribution on  $\mathcal{S}'$ , then  $\mathbb{V}(X, Y) := \sum_{s \in \mathcal{S}'} X(s)Y(s)^2 - (\sum_{s \in \mathcal{S}'} X(s)Y(s))^2$ .

A stationary and deterministic policy  $\pi : \mathcal{S} \rightarrow \mathcal{A}$  is a mapping from state  $s$  to action  $\pi(s)$ . A policy  $\pi$  is said to be proper if it reaches the goal with probability 1 when starting from any state in  $\mathcal{S}$  (otherwise it is improper). We denote by  $\Pi_{\text{proper}}$  the set of proper, stationary and deterministic policies. We make the following basic assumption which ensures that the SSP problem is well-posed.

**Assumption 1.** *There exists at least one proper policy, i.e.,  $\Pi_{\text{proper}} \neq \emptyset$ .*

The agent’s objective is to minimize its expected cumulative cost incurred until the goal is reached. The value function (also called cost-to-go) of a policy  $\pi$  and its associated  $Q$ -function are defined as

$$V^\pi(s) := \lim_{T \rightarrow \infty} \mathbb{E} \left[ \sum_{t=1}^T c_t(s_t, \pi(s_t)) \mid s_1 = s \right], \quad Q^\pi(s, a) := \lim_{T \rightarrow \infty} \mathbb{E} \left[ \sum_{t=1}^T c_t(s_t, \pi(s_t)) \mid s_1 = s, \pi(s_1) = a \right],$$

where  $c_t \in [0, 1]$  is the (instantaneous) cost incurred at time  $t$  at state-action pair  $(s_t, \pi(s_t))$ , and the expectation is w.r.t. the random sequence of states generated by executing  $\pi$  starting from state  $s \in \mathcal{S}$  (and taking action  $a \in \mathcal{A}$  in the second case). Note that  $V^\pi$  may have unbounded components if  $\pi$  never reaches the goal. For a proper policy  $\pi$ ,  $V^\pi(s)$  and  $Q^\pi(s, a)$  are finite for any  $s, a$ . By definition of the goal, we set  $V^\pi(g) = Q^\pi(g, a) = 0$  for all policies  $\pi$  and actions  $a$ . Finally, we

<sup>4</sup>We conjecture the optimal problem-independent regret in SSP to be  $\tilde{O}(B_*\sqrt{SAK} + B_*SA)$  (by analogy with the conjecture of Menard et al. [2021] for finite-horizon MDPs), which shows the tightness of our bound up to an  $S$  lower-order factor.

<sup>5</sup>A different line of work [e.g. Neu et al., 2010, 2012, Rosenberg and Mansour, 2019a,b, Jin et al., 2020, Jin and Luo, 2020] studies finite-horizon MDPs with adversarial costs (sometimes called online loop-free SSP), where an episode ends after a fixed number of  $H$  steps (as opposed to lasting as long as the goal is reached).

denote by  $T^\pi(s)$  the expected time that  $\pi$  takes to reach  $g$  starting at state  $s$ ; in particular, if  $\pi$  is proper then  $T^\pi(s)$  is finite for all  $s$ , yet if  $\pi$  is improper there must exist at least one  $s$  such that  $T^\pi(s) = \infty$ .

Equipped with Asm. 1 and an additional condition on improper policies defined below, one can derive important properties on the optimal policy  $\pi^*$  that minimizes the value function component-wise.

**Lemma 2** (Bertsekas and Tsitsiklis, 1991; Yu and Bertsekas, 2013). *Suppose that Asm. 1 holds and that for every improper policy  $\pi'$  there exists at least one state  $s \in \mathcal{S}$  such that  $V^{\pi'}(s) = +\infty$ . Then the optimal policy  $\pi^*$  is stationary, deterministic, and proper. Moreover,  $V^* = V^{\pi^*}$  is the unique solution of the optimality equations  $V^* = \mathcal{L}V^*$  and  $V^*(s) < +\infty$  for any  $s \in \mathcal{S}$ , where for any vector  $V \in \mathbb{R}^{\mathcal{S}}$  the optimal Bellman operator  $\mathcal{L}$  is defined as  $\mathcal{L}V(s) := \min_{a \in \mathcal{A}} \{c(s, a) + P_{s,a}V\}$ . Also, the optimal  $Q$ -value, denoted by  $Q^* = Q^{\pi^*}$ , is related to the optimal value function as follows:  $Q^*(s, a) = c(s, a) + P_{s,a}V^*$  and  $V^*(s) = \min_{a \in \mathcal{A}} Q^*(s, a)$ , for all  $(s, a) \in \mathcal{S} \times \mathcal{A}$ .*

Since we will target the best proper policy, we will handle the second requirement of Lem. 2 as follows [Bertsekas and Yu, 2013, Rosenberg et al., 2020]. First, the requirement is in particular verified if all instantaneous costs are strictly positive. To deal with the case of non-negative costs, we can introduce a small additive perturbation  $\eta \in (0, 1]$  to all costs to yield a new (strictly positive) cost function  $c_\eta(s, a) = \max\{c(s, a), \eta\}$ . In this cost-perturbed MDP, the conditions of Lem. 2 hold so we get an optimal policy  $\pi_\eta^*$  that is stationary, deterministic and proper and has a finite value function  $V_\eta^*$ . Taking the limit as  $\eta \rightarrow 0$ , we have that  $\pi_\eta^* \rightarrow \pi^*$  and  $V_\eta^* \rightarrow V^*$ , where  $\pi^*$  is the optimal proper policy in the original model that is also stationary and deterministic, and  $V^*$  denotes its value function. This enables to circumvent the second condition of Lem. 2 and only require Asm. 1 to hold.

**Learning formulation.** We consider the learning problem where the agent does not have any prior knowledge of the cost function  $c$  or transition function  $P$ . Each episode starts at the initial state  $s_0$  (the extension to any possibly unknown distribution of initial states is straightforward), and ends *only* when the goal state  $g$  is reached (note that this may never happen if the agent does not reach the goal). We evaluate the performance of the agent after  $K$  episodes by its *regret*, which is defined as

$$R_K := \sum_{k=1}^K \sum_{h=1}^{I^k} c_h^k - K \cdot \min_{\pi \in \Pi_{\text{proper}}} V^\pi(s_0), \quad (1)$$

where  $I^k$  is the time needed to complete episode  $k$  and  $c_h^k$  is the cost incurred in the  $h$ -th step of episode  $k$  when visiting  $(s_h^k, a_h^k)$ . If there exists  $k$  such that  $I^k$  is infinite, then we define  $R_K = \infty$ . Throughout we denote the optimal proper policy by  $\pi^*$  and  $V^*(s) := V^{\pi^*}(s) = \min_{\pi \in \Pi_{\text{proper}}} V^\pi(s)$  and  $Q^*(s, a) := Q^{\pi^*}(s, a) = \min_{\pi \in \Pi_{\text{proper}}} Q^\pi(s, a)$  for all  $(s, a)$ . Let  $B_* > 0$  bound the values of  $V^*$ , i.e.,  $B_* := \max_{s \in \mathcal{S}} V^*(s)$ . Note that  $Q^*(s, a) \leq 1 + B_*$ . Also let  $T_* > 0$  bound the expected time-to-goal of the optimal policy, i.e.,  $T_* := \max_{s \in \mathcal{S}} T^{\pi^*}(s)$ . We see that  $B_* \leq T_* < +\infty$ .

### 3 Main Algorithm

We introduce our algorithm EB-SSP (Exploration Bonus for SSP) in Alg. 1. It takes as input the state-action space  $\mathcal{S} \times \mathcal{A}$  and confidence level  $\delta \in (0, 1)$ . For now it considers that an estimate  $B$  such that  $B \geq \max\{B_*, 1\}$  is available, and we later handle the case of unknown  $B_*$  (Sect. 4.2 and App. H). As explained in Sect. 2, the algorithm enforces the conditions of Lem. 2 to hold by adding a small cost perturbation  $\eta \in [0, 1]$  (cf. lines 3, 12 in Alg. 1) — either  $\eta = 0$  if the agent is aware that all costs are already positive, otherwise a careful choice of  $\eta > 0$  is provided in Sect. 4.

Our algorithm builds on a value-optimistic approach by sequentially constructing optimistic lower bounds on the optimal  $Q$ -function and executing the policy that greedily minimizes them. Similar to the MVP algorithm of Zhang et al. [2021a] designed for finite-horizon RL, we adopt the doubling update framework (first proposed by Jaksch et al. [2010]): whenever the number of visits of a state-action pair is doubled, the algorithm updates the empirical cost and transition probability of this state-action pair, and computes a new optimistic  $Q$ -estimate and optimistic greedy policy. Note that this slightly differs from MVP which waits for the end of its finite-horizon episode to update the policy. In SSP, however, having this delay may yield linear regret as the episode has the risk of never terminating under the current policy (e.g., if it is improper), which is why we perform the policy update instantaneously when the doubling condition is met.

---

**Algorithm 1:** Algorithm EB-SSP
 

---

```

1 Input:  $\mathcal{S}$ ,  $s_0 \in \mathcal{S}$ ,  $g \notin \mathcal{S}$ ,  $\mathcal{A}$ ,  $\delta$ .
2 Input: an estimate  $B$  guaranteeing  $B \geq \max\{B_*, 1\}$  (see Sect. 4.2 and App. H if not available).
3 Optional input: cost perturbation  $\eta \in [0, 1]$ .
4 Specify: Trigger set  $\mathcal{N} \leftarrow \{2^{j-1} : j = 1, 2, \dots\}$ . Constants  $c_1 = 6$ ,  $c_2 = 36$ ,  $c_3 = 2\sqrt{2}$ ,  $c_4 = 2\sqrt{2}$ .
5 For  $(s, a, s') \in \mathcal{S} \times \mathcal{A} \times \mathcal{S}'$ , set  $N(s, a) \leftarrow 0$ ;  $n(s, a) \leftarrow 0$ ;  $N(s, a, s') \leftarrow 0$ ;  $\hat{P}_{s,a,s'} \leftarrow 0$ ;
    $\theta(s, a) \leftarrow 0$ ;  $\hat{c}(s, a) \leftarrow 0$ ;  $Q(s, a) \leftarrow 0$ ;  $V(s) \leftarrow 0$ .
6 Set initial time step  $t \leftarrow 1$  and trigger index  $j \leftarrow 0$ .
7 for episode  $k = 1, 2, \dots$  do
8   Set  $s_t \leftarrow s_0$ 
9   while  $s_t \neq g$  do
10    Take action  $a_t = \arg \min_{a \in \mathcal{A}} Q(s_t, a)$ , incur cost  $c_t$  and observe next state  $s_{t+1} \sim P(\cdot | s_t, a_t)$ .
11    Set  $(s, a, s', c) \leftarrow (s_t, a_t, s_{t+1}, \max\{c_t, \eta\})$  and  $t \leftarrow t + 1$ .
12    Set  $N(s, a) \leftarrow N(s, a) + 1$ ,  $\theta(s, a) \leftarrow \theta(s, a) + c$ ,  $N(s, a, s') \leftarrow N(s, a, s') + 1$ .
13    if  $N(s, a) \in \mathcal{N}$  then
14       $\backslash\backslash$  Update triggered: VISGO procedure.
15      Set  $\hat{c}(s, a) \leftarrow \mathbb{I}[N(s, a) \geq 2] \frac{2\theta(s, a)}{N(s, a)} + \mathbb{I}[N(s, a) = 1]\theta(s, a)$  and  $\theta(s, a) \leftarrow 0$ .
16      For  $s' \in \mathcal{S}'$ , set  $\hat{P}_{s,a,s'} \leftarrow N(s, a, s')/N(s, a)$ ,  $n(s, a) \leftarrow N(s, a)$ , and  $\tilde{P}_{s,a,s'}$  as in Eq. 5.
17      Set  $j \leftarrow j + 1$ ,  $\epsilon_{V1} \leftarrow 2^{-j}/(SA)$  and  $i \leftarrow 0$ ,  $V^{(0)} \leftarrow 0$ ,  $V^{(-1)} \leftarrow +\infty$ .
18      For all  $(s, a) \in \mathcal{S} \times \mathcal{A}$ , set  $n^+(s, a) \leftarrow \max\{n(s, a), 1\}$  and  $\iota_{s,a} \leftarrow \ln\left(\frac{12SAS'[n^+(s,a)]^2}{\delta}\right)$ .
19      while  $\|V^{(i)} - V^{(i-1)}\|_\infty > \epsilon_{V1}$  do
20        For all  $(s, a) \in \mathcal{S} \times \mathcal{A}$ , set
21           $b^{(i+1)}(s, a) \leftarrow b(V^{(i)}, s, a)$ ,  $\backslash\backslash$  see Eq. 6 for bonus expression (2)
22           $Q^{(i+1)}(s, a) \leftarrow \max\{\hat{c}(s, a) + \tilde{P}_{s,a}V^{(i)} - b^{(i+1)}(s, a), 0\}$ , (3)
23           $V^{(i+1)}(s) \leftarrow \min_a Q^{(i+1)}(s, a)$ . (4)
24        Set  $V^{(i+1)}(g) = 0$  and  $i \leftarrow i + 1$ .
25      Set  $Q \leftarrow Q^{(i)}$ ,  $V \leftarrow V^{(i)}$ .

```

---

The main algorithmic component lies in how to compute the  $Q$ -values (w.r.t. which the policy is greedy) when a doubling condition is met. To this purpose, we introduce a procedure called VISGO, for Value Iteration with Slight Goal Optimism. Starting with optimistic values  $V^{(0)} = 0$ , it iteratively computes  $V^{(i+1)} = \tilde{\mathcal{L}}V^{(i)}$  for a carefully defined operator  $\tilde{\mathcal{L}}$ . It ends when a stopping condition is met, specifically once  $\|V^{(i+1)} - V^{(i)}\|_\infty \leq \epsilon_{V1}$  for a precision level  $\epsilon_{V1} > 0$  (specified later), and it outputs the values  $V^{(i+1)}$  (and  $Q$ -values  $Q^{(i+1)}$ ). We now explain how we design  $\tilde{\mathcal{L}}$  and then provide some intuition. Let  $\hat{P}$  and  $\hat{c}$  be the current empirical transition probabilities and costs, and let  $n(s, a)$  be the current number of visits to state-action pair  $(s, a)$  (and  $n^+(s, a) = \max\{n(s, a), 1\}$ ). We first define transition probabilities  $\tilde{P}$  that are slightly skewed towards the goal w.r.t.  $\hat{P}$ , as follows

$$\tilde{P}_{s,a,s'} := \frac{n(s, a)}{n(s, a) + 1} \hat{P}_{s,a,s'} + \frac{\mathbb{I}[s' = g]}{n(s, a) + 1}. \quad (5)$$

Given the estimate  $B$ , specific positive constants  $c_1, c_2, c_3, c_4$  and a state-action dependent logarithmic term  $\iota_{s,a}$ , we then define the exploration bonus function, for any state-action pair  $(s, a) \in \mathcal{S} \times \mathcal{A}$  and vector  $V \in \mathbb{R}^{\mathcal{S}'}$  such that  $V(g) = 0$ , as follows

$$b(V, s, a) := \max \left\{ c_1 \sqrt{\frac{\mathbb{V}(\tilde{P}_{s,a}, V) \iota_{s,a}}{n^+(s, a)}}, c_2 \frac{B \iota_{s,a}}{n^+(s, a)} \right\} + c_3 \sqrt{\frac{\hat{c}(s, a) \iota_{s,a}}{n^+(s, a)}} + c_4 \frac{B \sqrt{S' \iota_{s,a}}}{n^+(s, a)}. \quad (6)$$

Note that the last term in Eq. 6 accounts for the skewing of  $\tilde{P}$  w.r.t.  $\hat{P}$  (see Lem. 14). Given the transitions  $\tilde{P}$  and exploration bonus  $b$ , we are ready to define the operator  $\tilde{\mathcal{L}}$  as

$$\tilde{\mathcal{L}}V(s) := \max \left\{ \min_{a \in \mathcal{A}} \{ \hat{c}(s, a) + \tilde{P}_{s,a}V - b(V, s, a) \}, 0 \right\}. \quad (7)$$

We see that  $\tilde{\mathcal{L}}$  promotes optimism in two different ways:

- (i) On the empirical cost function  $\hat{c}$ , via the bonus  $b$  (Eq. 6) that intuitively lowers the costs to  $\hat{c} - b$ ;
- (ii) On the empirical transition function  $\hat{P}$ , via the transitions  $\tilde{P}$  (Eq. 5) that slightly bias  $\hat{P}$  with the addition of a non-zero probability of reaching the goal from *every* state-action pair.

While the first feature (i) is standard in finite-horizon approaches, the second (ii) is SSP-specific, and is required to cope with the fact that the empirical model  $\hat{P}$  may *not* admit any proper policy, meaning that executing value iteration for SSP on  $\hat{P}$  may diverge. Our simple transition skewing actually guarantees that *all* policies are proper in  $\tilde{P}$ , for any fixed and bounded cost function.<sup>6</sup> By decaying the extra goal-reaching probability inversely with  $n(s, a)$ , we can tightly control the gap between  $\tilde{P}$  and  $\hat{P}$  and ensure that it only accounts for a lower-order regret term (cf. last term of Eq. 6).

Equipped with these two sources of optimism, as long as  $B \geq B_*$ , we are able to prove that a VISGO procedure verifies the following two key properties:

- (1) **Optimism:** VISGO outputs an optimistic estimator of the optimal  $Q$ -function at each iteration step, i.e.,  $Q^{(i)}(s, a) \leq Q^*(s, a), \forall i \geq 0$ ,
- (2) **Finite-time near-convergence:** VISGO terminates within a finite number of iteration steps (note that the final iterate  $V^{(j)}$  approximates the fixed point of  $\tilde{\mathcal{L}}$  up to an error scaling with  $\epsilon_{\text{VI}}$ ).

To satisfy (1), we derive similarly to MVP [Zhang et al., 2021a] a *monotonicity* property for the operator  $\tilde{\mathcal{L}}$ , which is achieved by carefully tuning the constants  $c_1, c_2, c_3, c_4$  in the bonus of Eq. 6. On the other hand, the requirement (2) is SSP-specific, since it is not needed in finite-horizon where value iteration requires exactly  $H$  backward induction steps. *Without* bonuses, the design of  $\tilde{P}$  would have directly entailed that  $\tilde{\mathcal{L}}$  is contractive and convergent [Bertsekas, 1995]. However, our variance-aware exploration bonuses introduce a subtle correlation between value iterates (i.e.,  $b$  depends on  $V$  in Eq. 6), which leads to a cost function that varies across iterates. By directly analyzing  $\tilde{\mathcal{L}}$ , we establish that it is contractive with modulus  $\rho := 1 - \nu < 1$ , where  $\nu := \min_{s,a} \tilde{P}_{s,a,g} > 0$ . This *contraction* property guarantees a polynomially bounded number of iterations before terminating, i.e., (2).

**Remark 1** (Computational complexity). Denote by  $T$  the accumulated time within the  $K$  episodes. By the stopping condition  $\|V^{(i+1)} - V^{(i)}\|_\infty \leq \epsilon_{\text{VI}}$ , the choice of  $\epsilon_{\text{VI}}$  and the  $\rho$ -contraction of the operator  $\tilde{\mathcal{L}}$  with  $\rho \leq 1 - 1/T$ , any VISGO procedure is guaranteed to stop at an iteration  $i \leq \log(\max\{B_*, 1\}/\epsilon_{\text{VI}})/(1 - \rho) = O(TSA \log(T \max\{B_*, 1\}))$ . Since there are at most  $O(SA \log T)$  VISGO procedures, we see that the total computational complexity of EB-SSP is near-linear in  $T$ , where  $T$  is bounded polynomially w.r.t.  $K$  as shown in the various cases of Sect. 4.1 (see App. G for details). Therefore EB-SSP is computationally efficient. Note that its  $\text{poly}(K)$  complexity is a limitation shared by all existing parameter-free algorithms in SSP. On the other hand, the algorithm of Cohen et al. [2021] can obtain a  $\log(K)$  computational complexity but only with  $T_*$  prior knowledge: without it, using the upper bound  $T_* \leq B_*/c_{\min}$ , where  $c_{\min}^{-1}$  becomes  $\text{poly}(K)$  when applying the cost perturbation trick, also leads to  $\text{poly}(K)$  complexity. It is an interesting open question whether it is possible in SSP to have  $\log(K)$  computational complexity while staying parameter-free.

## 4 Main Results

Besides ensuring the computational efficiency of EB-SSP, the properties of VISGO lay the foundations for our regret analysis (App. D) to yield the following general guarantee.

**Theorem 3.** *Assume that  $B \geq \max\{B_*, 1\}$  and that the conditions of Lem. 2 hold. Then with probability at least  $1 - \delta$  the regret of EB-SSP (Alg. 1 with  $\eta = 0$ ) can be bounded by*

$$R_K = O\left(\sqrt{(B_*^2 + B_*)SAK} \log\left(\frac{\max\{B_*, 1\}SAT}{\delta}\right) + BS^2A \log^2\left(\frac{\max\{B_*, 1\}SAT}{\delta}\right)\right),$$

with  $T$  the accumulated time within the  $K$  episodes.

<sup>6</sup>In fact this transition skewing implies that an SSP problem defined on  $\tilde{P}$  is equivalent to a discounted RL problem, with a varying state-action dependent discount factor. Also note that for different albeit mildly related purposes, a perturbation trick is sometimes used in regret minimization for average-reward MDPs [e.g., Fruit et al., 2018, Qian et al., 2019], where a non-zero probability of reaching an arbitrary state at each state-action is added to guarantee that all policies are unichain and that value iteration variants nearly converge in finite-time.

Thm. 3 is an intermediate result for the regret of EB-SSP, as it depends on the *random and possibly unbounded* total number of steps  $T$  executed over  $K$  episodes, it requires the possibly restrictive second condition of Lem. 2, and it relies on the parameter  $B$  being properly tuned. Nonetheless, it already displays interesting properties: **1)** The dependence on  $T$  is limited to logarithmic terms; **2)** The parameter  $B$  only affects the lower order term, while the main order term naturally scales with the exact range  $B_*$ ; **3)** Up to dependence on  $T$ , the main order term displays minimax optimal dependencies on  $B_*$ ,  $S$ ,  $A$ , and  $K$ .

Throughout the rest of the section, we consider for ease of exposition that  $B_* \geq 1$ .<sup>7</sup> For simplicity, when tuning the cost perturbations later, we assume as in prior works [e.g., Rosenberg et al., 2020, Chen et al., 2021, Chen and Luo, 2021] that the total number of episodes  $K$  is known to the agent (this knowledge can be eliminated with the standard doubling trick).

**Proof idea of Thm. 3.** We decompose the regret into three parts:  $X_1$  (error on the optimistic  $V$ -values),  $X_2$  (Bellman error) and  $X_3$  (cost estimation error), and among them the major part is  $X_2$ . Later,  $X_1$  and  $X_2$  introduce the intermediate quantities  $X_4$  (variance of the optimistic  $V$ -values) and  $X_5$  (variance of the differences  $V^* - V$ ), which are bounded using the recursion technique generalized from Zhang et al. [2021a], where we normalize the values by  $1/B_*$  to avoid an exponential blow-up in the recursions. At a high-level, the key idea is to calculate errors of different orders,  $F(1), F(2), \dots, F(d), \dots$  (see Lem. 24 and 25), and recursively bound  $F(i)$ 's variance by a sublinear function of  $F(i+1)$ . Throughout the proof, we bound quantities by solving inequalities that contain the unknown quantities on both sides, such as  $X_3 \leq \tilde{O}(\sqrt{X_3 + C_K})$  or  $X_2 \leq \tilde{O}(\sqrt{X_2 + C_K})$ , where the random variable  $C_K$  denotes the cumulative cost over the  $K$  episodes. Indeed, the analysis at each time step  $t$  brings out the instantaneous cost  $c_t$  and it is important to combine them so that we can make  $C_K$  appear explicitly. Ultimately, we obtain a regret bound scaling as  $R_K = \tilde{O}((\sqrt{B_*} + 1)\sqrt{SAC_K})$ . Since the regret in SSP is defined as  $R_K = C_K - KV^*(s_0)$ , we obtain a quadratic inequality in  $C_K$ , which we solve to get the  $\tilde{O}(\sqrt{(B_*^2 + B_*)SAK})$  regret bound.

#### 4.1 Regret Bounds for $B = B_*$

First we assume that  $B = B_*$  (i.e., the agent has prior knowledge of  $B_*$ ) and we instantiate the regret achieved by EB-SSP under various conditions on the SSP model.

□ **Positive Costs.** We first focus on the case of positive costs.

**Assumption 4.** All costs are lower bounded by a constant  $c_{\min} > 0$  which is unknown to the agent.

Asm. 4 guarantees that the conditions of Lem. 2 hold. Moreover, denoting by  $C$  the cumulative cost over  $K$  episodes, the total time satisfies  $T \leq C/c_{\min}$ . By simplifying the bound of Thm. 3 as  $C \leq B_*K + R_K \leq O(B_*S^2AK \cdot \sqrt{B_*TSA/\delta})$ , we loosely obtain that  $T = O(B_*^3S^5A^3K^2/(c_{\min}^2\delta))$ .

**Corollary 5.** Under Asm. 4, running EB-SSP (Alg. 1) with  $B = B_*$  and  $\eta = 0$  gives the following regret bound with probability at least  $1 - \delta$

$$R_K = O\left(B_*\sqrt{SAK} \log\left(\frac{KB_*SA}{c_{\min}\delta}\right) + B_*S^2A \log^2\left(\frac{KB_*SA}{c_{\min}\delta}\right)\right).$$

The bound of Cor. 5 only depends polynomially on  $K, S, A, B_*$ . We note that  $T_* \leq B_*/c_{\min}$  and that this upper bound only appears in the logarithms. Under positive costs, the regret of EB-SSP is thus (nearly) **minimax** and **horizon-free**. Furthermore, in App. B we introduce an alternative assumption on the SSP problem (which is weaker than Asm. 4) that considers that there are no almost-sure zero-cost cycles. In this case also, the regret of EB-SSP is (nearly) minimax and horizon-free.

□ **General Costs and  $T_*$  Unknown.** Now we handle the case of non-negative costs, with no assumption other than Asm. 1. We use a cost perturbation argument to generalize the results from positive to general costs (similar to Tarbouriech et al. [2020a], Rosenberg et al. [2020]). As reviewed in Sect. 2, this circumvents the second condition of Lem. 2 (which holds in the cost-perturbed MDP) and target the optimal proper policy in the original MDP up to a bias scaling with the cost perturbation. Indeed, running EB-SSP with costs  $c_\eta(s, a) \leftarrow \max\{c(s, a), \eta\}$  for  $\eta \in (0, 1]$  gives the bound of Cor. 5 with  $c_{\min} \leftarrow \eta$ ,  $B_* \leftarrow B_* + \eta T_*$  and an additive bias of  $\eta T_* K$ . We then pick  $\eta$  to balance these terms.

<sup>7</sup>Otherwise, all later bounds hold by replacing  $B_*$  with  $\max\{B_*, 1\}$ , except for the  $B_*$  factor in the leading term that becomes  $\sqrt{B_*}$ . This matches the lower bound of Cohen et al. [2021] of  $\Omega(\sqrt{B_*SAK})$  for  $B_* < 1$ .



**Corollary 6.** Let  $L := \log(KT_*SA\delta^{-1})$ . Running EB-SSP (Alg. 1) with  $B = B_*$  and  $\eta = K^{-n}$  for any choice of constant  $n > 1$  gives the following regret bound with probability at least  $1 - \delta$

$$R_K = O\left(nB_*\sqrt{SAKL} + \frac{T_*}{K^{n-1}} + \frac{nT_*\sqrt{SAL}}{K^{n-1/2}} + n^2B_*S^2AL^2\right).$$

This bound can be decomposed as (i) a  $\sqrt{K}$  leading term and (ii) an additive term that depends on  $T_*$  and vanishes as  $K \rightarrow +\infty$  (we omit the last term that does not depend polynomially on either  $K$  or  $T_*$ ). Note that the second term (ii) can be made as small as possible by increasing the choice of exponent  $n$  in the cost perturbation, at the cost of the multiplicative constant  $n$  in (i). Equipped only with Asm. 1, the regret of EB-SSP is thus (nearly) **minimax**, and it may be dubbed as *horizon-vanishing* when  $K$  is given in advance, insofar as it contains an additive term that depends on  $T_*$  and that becomes negligible for large values of  $K$  (if  $K$  is unknown in advance, the application of the doubling trick yields an additive term (ii) scaling as  $T_*$ ). We now show that the trade-off between (i) and (ii) can be resolved with loose knowledge of  $T_*$  and leads to a horizon-free bound.

□ **General Costs and Order-Accurate Estimate of  $T_*$  Available.** We now consider that an order-accurate estimate of  $T_*$  is available. It may be a constant lower-bound approximation away from  $T_*$ , or a polynomial upper-bound approximation away from  $T_*$ .

**Assumption 7.** The agent has prior knowledge of a quantity  $\bar{T}_*$  that verifies  $\frac{T_*}{v} \leq \bar{T}_* \leq \lambda T_*^\zeta$  for some unknown constants  $v, \lambda, \zeta \geq 1$ . (Note that  $v = \lambda = \zeta = 1$  when  $T_*$  is known.)

We now tune the cost perturbation  $\eta$  using  $\bar{T}_*$ . Specifically, selecting  $\eta := (\bar{T}_*K)^{-1}$  ensures that the bias satisfies  $\eta T_*K \leq v = O(1)$ . We thus obtain the following guarantee (see App. C for the explicit dependencies on the constant terms  $v, \lambda, \zeta$  which only appear as multiplicative and additive factors).

**Corollary 8.** Under Asm. 7, running EB-SSP (Alg. 1) with  $B = B_*$  and  $\eta = (\bar{T}_*K)^{-1}$  gives the following regret bound with probability at least  $1 - \delta$

$$R_K = O\left(B_*\sqrt{SAK} \log\left(\frac{KT_*SA}{\delta}\right) + B_*S^2A \log^2\left(\frac{KT_*SA}{\delta}\right)\right).$$

This bound depends polynomially on  $K, S, A, B_*$ , and only logarithmically on  $T_*$ . Thus under general costs with an order-accurate estimate of  $T_*$ , EB-SSP's regret is (nearly) **minimax** and **horizon-free**.

We can compare Cor. 8 with the concurrent result of Cohen et al. [2021]. Their regret bound scales as  $O(B_*\sqrt{SAKL} + T_*^4S^2AL^5)$  with  $L = \log(KT_*SA\delta^{-1})$  under the assumptions of known  $T_*$  and  $B_*$  (or tight upper bounds of them), which imply that the conditions of Cor. 8 hold. The bound of Cor. 8 is strictly tighter, since it always holds that  $B_* \leq T_*$  and the gap between the two may be arbitrarily large (see e.g., App. A), especially when some instantaneous costs are very small.

## 4.2 Regret Bounds for Unknown $B_*$ with Parameter-Free EB-SSP

We now introduce a parameter-free version of EB-SSP that bypasses the requirement of  $B \geq B_*$  (line 2 of Alg. 1). Note that the challenge of not knowing the range of the optimal value function does not appear in finite-horizon MDPs, where the bound  $H$  (or 1 for Zhang et al. [2021a]) is assumed to be known to the agent. In SSP, if the agent does not have a valid estimate  $B \geq B_*$ , then it may design an under-specified exploration bonus which cannot guarantee optimism. The case of unknown  $B_*$  is non-trivial: it appears impossible to properly estimate  $B_*$  (since some states may never be visited) and it is unclear how a standard doubling trick may be used.<sup>8</sup>

Parameter-free EB-SSP initializes a proxy  $\tilde{B} = 1$  and increases it over the learning interaction according to a carefully defined schedule. We need to ensure that the proxy  $\tilde{B}$  does not remain below  $B^*$  for too long, since in this case, the regret may keep growing linearly. Thus, our *first condition* to increase  $\tilde{B}$  is whenever a new episode  $k$  begins, specifically we set  $\tilde{B} \leftarrow \max\{\tilde{B}, \sqrt{k}/(S^{3/2}A^{1/2})\}$ , which ensures that  $\tilde{B} \geq B^*$  for large enough episodes. However, this is not enough: indeed notice that when  $\tilde{B} < B^*$ , the agent may never reach the goal and thus get *stuck* in the episode, so we cannot

<sup>8</sup>Note that Qian et al. [2019] raised an open question whether it is possible to design an exploration bonus strategy in a setting where no prior knowledge of the “optimal range” is available. Indeed their approach in average-reward MDPs relies on prior knowledge of an upper bound on the optimal bias span.

exclusively rely on the end of an episode as a trigger for increasing  $\tilde{B}$ . Our *second condition* to increase  $\tilde{B}$  is to set  $\tilde{B} \leftarrow 2\tilde{B}$  whenever the cumulative cost exceeds a carefully defined threshold (that depends on  $\tilde{B}$ ,  $S$ ,  $A$ ,  $\delta$  and the current episode and time indexes  $k$  and  $t$ , which are all computable quantities). Since the regret is upper bounded by the cumulative cost, this second condition prevents the learner from accumulating too large regret when  $\tilde{B} < B^*$ . Finally, we introduce a *third condition* to increase  $\tilde{B}$  in order to ensure the computational efficiency, since VISGO may diverge when  $\tilde{B} < B^*$  (specifically, we track the range of the value  $V^{(i)}$  at each VISGO iteration  $i$  and if  $\|V^{(i)}\|_\infty > \tilde{B}$ , then we terminate VISGO and increase  $\tilde{B} \leftarrow 2\tilde{B}$ ). At a high-level, the analysis of the scheme proceeds as follows: we bound the regret by the cumulative cost when  $\tilde{B} < B^*$  (first regime), and by the regret bound of Thm. 3 when  $\tilde{B} \geq B^*$  (second regime). Note that this two-regime decomposition is only implicit (i.e., at the level of analysis), since the agent is unable to know in which regime it is (since  $B^*$  is unknown). The full pseudo-code and analysis of parameter-free EB-SSP is deferred to App. H.

**Theorem 9** (Extension of Theorem 3 to unknown  $B_*$ ). *Assume the conditions of Lem. 2 hold. Then with probability at least  $1 - \delta$  the regret of parameter-free EB-SSP (Alg. 2, App. H) can be bounded by*

$$R_K = O\left(R_K^* \log\left(\frac{B_* SAT}{\delta}\right) + B_*^3 S^3 A \log^3\left(\frac{B_* SAT}{\delta}\right)\right),$$

where  $T$  is the cumulative time within the  $K$  episodes and  $R_K^*$  bounds the regret after  $K$  episodes of EB-SSP in the case of known  $B_*$  (i.e., the bound of Thm. 3 with  $B = B_*$ ).

Thm. 9 implies that we can remove the condition of  $B \geq \max\{B_*, 1\}$  in Thm. 3, i.e., we make the statement **parameter-free**. Hence, *all* the regret bounds from Sect. 4.1 in the case of known  $B_*$  (i.e., Cor. 5, 6, 8, 11) still hold up to additional logarithmic and lower-order terms when  $B_*$  is unknown.

## 5 Conclusion

We introduced EB-SSP, the first algorithm for online SSP to be *simultaneously* nearly minimax-optimal and parameter-free (i.e., it does not need to know  $T_*$  nor  $B_*$ ). Also in various cases its regret is nearly horizon-free with only a *logarithmic* dependence on  $T_*$ , thus exponentially improving over existing bounds w.r.t. the dependence on  $T_*$ , which may be arbitrarily larger than  $B_*$  when instantaneous costs are small. The horizon-free property is perhaps even more meaningful in the goal-oriented setting than in finite-horizon MDPs (with total reward bounded by 1) [e.g., Wang et al., 2020a, Zhang et al., 2021a,b], as we do *not* impose a known constraint on the total cost of a trajectory.

An interesting question raised by our paper is whether it is possible to simultaneously achieve minimax, parameter-free and horizon-free regret for SSP under general costs. Another direction can be to build on our approach (e.g., the VISGO procedure) to derive tight sample complexity bounds in SSP, which as explained by Tarbouriech et al. [2021] do not directly ensue from regret guarantees.

## Acknowledgement

SSD gratefully acknowledges the funding from NSF Award’s IIS-2110170 and DMS-2134106.

## References

- Mohammad Gheshlaghi Azar, Ian Osband, and Rémi Munos. Minimax regret bounds for reinforcement learning. In *Proceedings of the 34th International Conference on Machine Learning-Volume 70*, pages 263–272. JMLR. org, 2017.
- Peter L Bartlett and Ambuj Tewari. Regal: A regularization based algorithm for reinforcement learning in weakly communicating mdps. *arXiv preprint arXiv:1205.2661*, 2012.
- Dimitri Bertsekas. *Dynamic programming and optimal control*, volume 2. 1995.
- Dimitri P Bertsekas. *Linear network optimization: algorithms and codes*. Mit Press, 1991.

- Dimitri P Bertsekas and John N Tsitsiklis. An analysis of stochastic shortest path problems. *Mathematics of Operations Research*, 16(3):580–595, 1991.
- Dimitri P Bertsekas and Huizhen Yu. Stochastic shortest path problems under weak conditions. *Lab. for Information and Decision Systems Report LIDS-P-2909*, MIT, 2013.
- Blai Bonet. On the speed of convergence of value iteration on stochastic shortest-path problems. *Mathematics of Operations Research*, 32(2):365–373, 2007.
- Liyu Chen and Haipeng Luo. Finding the stochastic shortest path with low regret: The adversarial cost and unknown transition case. *arXiv preprint arXiv:2102.05284*, 2021.
- Liyu Chen, Haipeng Luo, and Chen-Yu Wei. Minimax regret for stochastic shortest path with adversarial costs and known transition. In *Conference on Learning Theory*, pages 1180–1215. PMLR, 2021.
- Alon Cohen, Yonathan Efroni, Yishay Mansour, and Aviv Rosenberg. Minimax regret for stochastic shortest path. *arXiv preprint arXiv:2103.13056*, 2021.
- Yonathan Efroni, Nadav Merlis, Mohammad Ghavamzadeh, and Shie Mannor. Tight regret bounds for model-based reinforcement learning with greedy policies. In *Advances in Neural Information Processing Systems*, 2019.
- Ronan Fruit, Matteo Pirodda, Alessandro Lazaric, and Ronald Ortner. Efficient bias-span-constrained exploration-exploitation in reinforcement learning. In *International Conference on Machine Learning*, pages 1578–1586. PMLR, 2018.
- Matthieu Guilloit and Gautier Stauffer. The stochastic shortest path problem: a polyhedral combinatorics perspective. *European Journal of Operational Research*, 285(1):148–158, 2020.
- Thomas Jaksch, Ronald Ortner, and Peter Auer. Near-optimal regret bounds for reinforcement learning. *Journal of Machine Learning Research*, 11(Apr):1563–1600, 2010.
- Chi Jin, Zeyuan Allen-Zhu, Sebastien Bubeck, and Michael I Jordan. Is q-learning provably efficient? In *Advances in Neural Information Processing Systems*, pages 4863–4873, 2018.
- Chi Jin, Tiancheng Jin, Haipeng Luo, Suvrit Sra, and Tiancheng Yu. Learning adversarial markov decision processes with bandit feedback and unknown transition. In *International Conference on Machine Learning*, pages 4860–4869. PMLR, 2020.
- Tiancheng Jin and Haipeng Luo. Simultaneously learning stochastic and adversarial episodic mdps with known transition. *Advances in Neural Information Processing Systems*, 33, 2020.
- Andrey Kolobov, Mausam, Daniel Weld, and Hector Geffner. Heuristic search for generalized stochastic shortest path mdps. In *Proceedings of the International Conference on Automated Planning and Scheduling*, volume 21, 2011.
- Shiau Hong Lim and Peter Auer. Autonomous exploration for navigating in mdps. In *Conference on Learning Theory*, pages 40–1. JMLR Workshop and Conference Proceedings, 2012.
- Andreas Maurer and Massimiliano Pontil. Empirical bernstein bounds and sample variance penalization. *arXiv preprint arXiv:0907.3740*, 2009.
- Pierre Menard, Omar Darwiche Domingues, Xuedong Shang, and Michal Valko. Ucb momentum q-learning: Correcting the bias without forgetting. In *Proceedings of the 38th International Conference on Machine Learning*, pages 7609–7618. PMLR, 2021.
- Gergely Neu and Ciara Pike-Burke. A unifying view of optimism in episodic reinforcement learning. In *Advances in Neural Information Processing Systems*, volume 33, pages 1392–1403, 2020.
- Gergely Neu, András György, and Csaba Szepesvári. The online loop-free stochastic shortest-path problem. In *COLT*, volume 2010, pages 231–243. Citeseer, 2010.

- Gergely Neu, Andras Gyorgy, and Csaba Szepesvári. The adversarial stochastic shortest path problem with unknown transition probabilities. In *Artificial Intelligence and Statistics*, pages 805–813. PMLR, 2012.
- Jian Qian, Ronan Fruit, Matteo Pirota, and Alessandro Lazaric. Exploration bonus for regret minimization in discrete and continuous average reward mdps. In *Advances in Neural Information Processing Systems*, pages 4891–4900, 2019.
- Aviv Rosenberg and Yishay Mansour. Online convex optimization in adversarial markov decision processes. In *International Conference on Machine Learning*, pages 5478–5486. PMLR, 2019a.
- Aviv Rosenberg and Yishay Mansour. Online stochastic shortest path with bandit feedback and unknown transition function. *Advances in Neural Information Processing Systems*, 32:2212–2221, 2019b.
- Aviv Rosenberg and Yishay Mansour. Stochastic shortest path with adversarially changing costs. In *Proceedings of the Thirtieth International Joint Conference on Artificial Intelligence, IJCAI-21*, pages 2936–2942, 2021.
- Aviv Rosenberg, Alon Cohen, Yishay Mansour, and Haim Kaplan. Near-optimal regret bounds for stochastic shortest path. In *International Conference on Machine Learning*, pages 8210–8219. PMLR, 2020.
- Max Simchowitz and Kevin G. Jamieson. Non-asymptotic gap-dependent regret bounds for tabular mdps. In *Advances in Neural Information Processing Systems*, volume 32, pages 1151–1160, 2019.
- Jean Tarbouriech, Evrard Garcelon, Michal Valko, Matteo Pirota, and Alessandro Lazaric. No-regret exploration in goal-oriented reinforcement learning. In *International Conference on Machine Learning*, pages 9428–9437. PMLR, 2020a.
- Jean Tarbouriech, Matteo Pirota, Michal Valko, and Alessandro Lazaric. Improved sample complexity for incremental autonomous exploration in mdps. In *Advances in Neural Information Processing Systems*, volume 33, pages 11273–11284, 2020b.
- Jean Tarbouriech, Matteo Pirota, Michal Valko, and Alessandro Lazaric. Sample complexity bounds for stochastic shortest path with a generative model. In *Algorithmic Learning Theory*, pages 1157–1178. PMLR, 2021.
- Ruosong Wang, Simon S. Du, Lin F. Yang, and Sham M. Kakade. Is long horizon RL more difficult than short horizon RL? In *Advances in Neural Information Processing Systems*, 2020a.
- Yuanhao Wang, Kefan Dong, Xiaoyu Chen, and Liwei Wang. Q-learning with ucb exploration is sample efficient for infinite-horizon mdp. In *International Conference on Learning Representations*, 2020b.
- Chen-Yu Wei, Mehdi Jafarnia-Jahromi, Haipeng Luo, Hiteshi Sharma, and Rahul Jain. Model-free reinforcement learning in infinite-horizon average-reward markov decision processes. In *International Conference on Machine Learning*, 2020.
- Haike Xu, Tengyu Ma, and Simon S Du. Fine-grained gap-dependent bounds for tabular mdps via adaptive multi-step bootstrap. *arXiv preprint arXiv:2102.04692*, 2021.
- Huizhen Yu and Dimitri P Bertsekas. On boundedness of q-learning iterates for stochastic shortest path problems. *Mathematics of Operations Research*, 38(2):209–227, 2013.
- Andrea Zanette and Emma Brunskill. Tighter problem-dependent regret bounds in reinforcement learning without domain knowledge using value function bounds. In *International Conference on Machine Learning*, pages 7304–7312, 2019.
- Zihan Zhang, Yuan Zhou, and Xiangyang Ji. Almost optimal model-free reinforcement learning via reference-advantage decomposition. *Advances in Neural Information Processing Systems*, 33, 2020.

Zihan Zhang, Xiangyang Ji, and Simon Du. Is reinforcement learning more difficult than bandits? a near-optimal algorithm escaping the curse of horizon. In *Conference on Learning Theory*, pages 4528–4531. PMLR, 2021a.

Zihan Zhang, Jiaqi Yang, Xiangyang Ji, and Simon S Du. Variance-aware confidence set: Variance-dependent bound for linear bandits and horizon-free bound for linear mixture mdp. *arXiv preprint arXiv:2101.12745*, 2021b.

Zihan Zhang, Yuan Zhou, and Xiangyang Ji. Model-free reinforcement learning: from clipped pseudo-regret to sample complexity. In *Proceedings of the 38th International Conference on Machine Learning*, pages 12653–12662. PMLR, 2021c.

# Appendix

## Table of Contents

|          |                                                                                                         |           |
|----------|---------------------------------------------------------------------------------------------------------|-----------|
| <b>A</b> | <b><math>T_*</math> can be arbitrarily larger than <math>B_*</math>, <math>S</math>, <math>A</math></b> | <b>14</b> |
| <b>B</b> | <b>An Alternative Assumption on the SSP Problem: No Almost-Sure Zero-Cost Cycles</b>                    | <b>14</b> |
| <b>C</b> | <b>Full Statement of Corollary 8</b>                                                                    | <b>15</b> |
| <b>D</b> | <b>Proof of Theorem 3</b>                                                                               | <b>16</b> |
| <b>E</b> | <b>Missing Proofs</b>                                                                                   | <b>21</b> |
| <b>F</b> | <b>Technical Lemmas</b>                                                                                 | <b>33</b> |
| <b>G</b> | <b>Computational Complexity of EB-SSP</b>                                                               | <b>34</b> |
| <b>H</b> | <b>Unknown <math>B_*</math>: Parameter-Free EB-SSP</b>                                                  | <b>35</b> |

### A $T_*$ can be arbitrarily larger than $B_*$ , $S$ , $A$

Here we provide a simple illustration that the inequality  $B_* \leq T_*$  may be arbitrarily loose, which shows that scaling with  $T_*$  can be much worse than scaling with  $B_*$ . Recall that  $B_*$  bounds the total expected cost of the optimal policy starting from any state, and  $T_*$  bounds the expected time-to-goal of the optimal policy from any state.

Let us consider an SSP instance whose optimal policy induces the absorbing Markov chain depicted in Fig. 1. It is easy to see that  $B_* = 1$  and that  $T_* = \Omega(S p_{\min}^{-1})$ . Hence, the gap between  $B_*$  and  $T_*$  can grow arbitrarily large as  $p_{\min} \rightarrow 0$ .

This simple example illustrates the benefit of having a bound that is (nearly) *horizon-free* (cf. desired property 3 in Sect. 1). Indeed, a bound that is not horizon-free scales polynomially with  $T_*$  and thus with  $p_{\min}^{-1}$ , which may be arbitrarily large if  $p_{\min} \rightarrow 0$ . In contrast, a horizon-free bound only scales logarithmically with  $p_{\min}^{-1}$  and can therefore be much tighter.

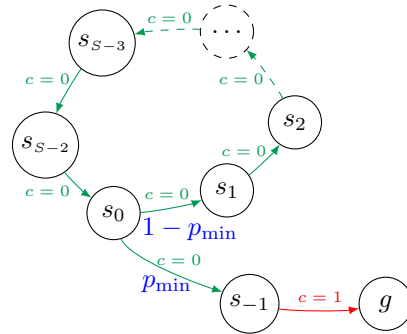

Figure 1: Markov chain of the optimal policy of an SSP instance with  $S$  states. Transitions in green incur a cost of 0, while the transition in red leading to the goal state  $g$  incurs a cost of 1. All transitions are deterministic, apart from the one starting from  $s_0$ , which reaches state  $s_{-1}$  with probability  $p_{\min}$  and state  $s_1$  with probability  $1 - p_{\min}$ , where  $p_{\min} > 0$ .

### B An Alternative Assumption on the SSP Problem: No Almost-Sure Zero-Cost Cycles

Here we complement Sect. 4.1 by introducing an alternative assumption on the SSP problem (which is weaker than Asm. 4) and we analyze the regret bound achieved by EB-SSP (under the set-up of Sect. 4.1). We draw inspiration from the common assumption in the deterministic shortest path setting that the transition graph does not possess any cycle of zero costs [Bertsekas, 1991]. In the following we introduce a “stochastic” counterpart of this assumption.

**Assumption 10.** *There exist unknown constants  $c^\dagger > 0$  and  $q^\dagger > 0$  such that:*

$$\mathbb{P}\left(\bigcap_{s' \in \mathcal{S}} \bigcap_{\omega \in \Omega_{s'}} \left\{ \sum_{i=1}^{|\omega|} c_i \geq c^\dagger \right\}\right) \geq q^\dagger,$$

where for every state  $s' \in \mathcal{S}$  we denote by  $\Omega_{s'}$  the set of all possible trajectories in the SSP-MDP that start from state  $s'$  and end in state  $s'$ , and we denote by  $c_1, \dots, c_{|\omega|}$  the sequence of costs incurred during a trajectory  $\omega$ .

Asm. 10 is strictly weaker than the assumption of positive costs (Asm. 4) and it guarantees that the conditions of Lem. 2 hold. Intuitively, it implies that the agent has a non-zero probability of gradually accumulating some positive cost as its trajectory length increases. In particular, under Asm. 10, any trajectory of length  $S + 1$  that does not reach the goal must accumulate costs of at least  $c^\dagger$  with probability at least  $q^\dagger$ .

When  $z \geq \ln(T/\delta)/q^\dagger \geq \frac{\ln(T/\delta)}{-\ln(1-q^\dagger)}$ , it is guaranteed that  $(1 - q^\dagger)^z \leq \delta/T$ . Repeatedly applying this argument means that with probability at least  $1 - \delta/T$ , for  $z \geq \ln(T/\delta)/q^\dagger$  it holds that either  $\sum_{i=1}^{z(S+1)} c_i \geq c^\dagger$ , or the agent has reached the goal in the trajectory indexed by the time steps  $[1, z(S+1)]$ . Denote  $z_0 := \lceil \ln(T/\delta)/q^\dagger \rceil$ . For each episode, divide time steps in it into chunks with length  $z_0(S+1)$ , with the exception that the last chunk in it may have length less than or equal to  $z_0(S+1)$  (just like taking modulo). So in each episode, the agent accumulates cost of at least  $c^\dagger$  in each chunk except for the last one, and in the last chunk the agent reaches  $g$ . If we define  $Z$  as the total number of chunks with cost at least  $c^\dagger$  in all episodes, then  $Z \geq \frac{T - Kz_0(S+1)}{z_0(S+1)}$ . Thus from  $C \geq Zc^\dagger$

we have  $T \leq O\left(\frac{S \log(T/\delta)}{q^\dagger} \left(\frac{C}{c^\dagger} + K\right)\right) \leq O(S(T/\delta)^{1/4} CK / (q^\dagger c^\dagger))$ , with  $C$  the cumulative cost.

Using the loose bound  $C \leq O(B_* S^2 AK \cdot \sqrt{B_* TSA/\delta})$  and isolating  $T$  (with the same reasoning as in the case of positive costs in Sect. 4.1) gives that  $T \leq O(B_*^6 S^{14} A^6 K^8 / ((q^\dagger c^\dagger)^4 \delta^3))$  and thus that  $\log T = O(\log(KB_* SA / (c^\dagger q^\dagger \delta)))$ . Plugging this in Thm. 3 yields the following.

**Corollary 11.** *Under Asm. 10, running EB-SSP (Alg. 1) with  $B = B_* \geq 1$  and  $\eta = 0$  gives the following regret bound with probability at least  $1 - \delta$*

$$R_K = O\left(B_* \sqrt{SAK} \log\left(\frac{KB_* SA}{c^\dagger q^\dagger \delta}\right) + B_* S^2 A \log^2\left(\frac{KB_* SA}{c^\dagger q^\dagger \delta}\right)\right).$$

The regret bound of Cor. 11 is (nearly) **minimax** and **horizon-free** (and it can be made **parameter-free** by executing Alg. 2 instead of Alg. 1). The bound depends logarithmically on the inverse of the constants  $c^\dagger, q^\dagger$ . We observe that i) it no longer becomes relevant if one constant is exponentially small, ii) spelling out  $c^\dagger, q^\dagger$  satisfying Asm. 10 is challenging as they subtly depend on both the cost function and the transition dynamics, although iii) the agent does not need to know nor estimate  $c^\dagger$  and  $q^\dagger$  to achieve the regret bound of Cor. 11.

## C Full Statement of Corollary 8

Here we make explicit the *constant* terms  $\nu, \lambda, \zeta$  in the regret bound of Cor. 8.

Recall that Asm. 7 considers that the agent has prior knowledge of a quantity  $\bar{T}_*$  that verifies  $T_*/\nu \leq \bar{T}_* \leq \lambda T_*^\zeta$  for some unknown constants  $\nu, \lambda, \zeta \geq 1$  (note that  $\nu = \lambda = \zeta = 1$  when  $T_*$  is known). Under Asm. 7, running EB-SSP (Alg. 1) with  $B = B_*$  and  $\eta = (\bar{T}_* K)^{-1}$  gives the following regret bound with probability at least  $1 - \delta$

$$R_K = O\left(\left(B_* + \frac{\nu}{K}\right) \sqrt{SAK} \zeta \log\left(\frac{\lambda K T_* SA}{\delta}\right) + \left(B_* + \frac{\nu}{K}\right) S^2 A \zeta^2 \log^2\left(\frac{\lambda K T_* SA}{\delta}\right) + \nu\right).$$

## D Proof of Theorem 3

In this section, we present the proof of Thm. 3 (the missing proofs of the intermediate results within the section are deferred to App. E). We recall that throughout App. D we analyze Alg. 1 without cost perturbation (i.e.,  $\eta = 0$ ) and we assume that 1) the estimate verifies  $B \geq \max\{B_*, 1\}$  and 2) the conditions of Lem. 2 hold.

### D.1 High-Probability Event

**Definition 12** (High-probability event). *We define the event  $\mathcal{E} := \mathcal{E}_1 \cap \mathcal{E}_2 \cap \mathcal{E}_3$ , where*

$$\mathcal{E}_1 := \left\{ \forall (s, a) \in \mathcal{S} \times \mathcal{A}, \forall n(s, a) \geq 1 : |(\widehat{P}_{s,a} - P_{s,a})V^*| \leq 2\sqrt{\frac{\mathbb{V}(\widehat{P}_{s,a}, V^*)\iota_{s,a}}{n(s,a)} + \frac{14B_*\iota_{s,a}}{3n(s,a)}} \right\}, \quad (8)$$

$$\mathcal{E}_2 := \left\{ \forall (s, a) \in \mathcal{S} \times \mathcal{A}, \forall n(s, a) \geq 1 : |\widehat{c}(s, a) - c(s, a)| \leq 2\sqrt{\frac{2\widehat{c}(s, a)\iota_{s,a}}{n(s,a)} + \frac{28\iota_{s,a}}{3n(s,a)}} \right\}, \quad (9)$$

$$\mathcal{E}_3 := \left\{ \forall (s, a, s') \in \mathcal{S} \times \mathcal{A} \times \mathcal{S}', \forall n(s, a) \geq 1 : |P_{s,a,s'} - \widehat{P}_{s,a,s'}| \leq \sqrt{\frac{2P_{s,a,s'}\iota_{s,a}}{n(s,a)} + \frac{\iota_{s,a}}{n(s,a)}} \right\}, \quad (10)$$

where  $\iota_{s,a} := \ln\left(\frac{12SAS'[n^+(s,a)]^2}{\delta}\right)$ .

**Lemma 13.** *It holds that  $\mathbb{P}(\mathcal{E}) \geq 1 - \delta$ .*

*Proof.* The events  $\mathcal{E}_1$  and  $\mathcal{E}_2$  hold with probability at least  $1 - 2\delta/3$  by the concentration inequality of Lem. 27 and by union bound over all  $(s, a) \in \mathcal{S} \times \mathcal{A}$ . The event  $\mathcal{E}_3$  holds with probability at least  $1 - \delta/3$  by Bennett's inequality (Lem. 26, anytime version), by Lem. 33 and by union bound over all  $(s, a, s') \in \mathcal{S} \times \mathcal{A} \times \mathcal{S}'$ .  $\square$

### D.2 Analysis of a VISGO Procedure

A VISGO procedure in Alg. 1 computes iterates of the form  $V^{(i+1)} = \widetilde{\mathcal{L}}V^{(i)}$ , where  $\widetilde{\mathcal{L}}$  is an operator that we define as follows. For any  $U \in \mathbb{R}^{S'}$  such that  $U(g) = 0$ , we set  $\widetilde{\mathcal{L}}U(g) := 0$  and for  $s \in \mathcal{S}$  we set  $\widetilde{\mathcal{L}}U(s) := \min_{a \in \mathcal{A}} \widetilde{\mathcal{L}}U(s, a)$ , where

$$\begin{aligned} \widetilde{\mathcal{L}}U(s, a) := \max \left\{ \widehat{c}(s, a) + \widetilde{P}_{s,a}U - \max \left\{ c_1 \sqrt{\frac{\mathbb{V}(\widetilde{P}_{s,a}, U)\iota_{s,a}}{n^+(s,a)}}, c_2 \frac{B\iota_{s,a}}{n^+(s,a)} \right\} \right. \\ \left. - c_3 \sqrt{\frac{\widehat{c}(s, a)\iota_{s,a}}{n^+(s,a)}} - c_4 \frac{B\sqrt{S'\iota_{s,a}}}{n^+(s,a)}, 0 \right\}. \end{aligned} \quad (11)$$

Starting from an optimistic initialization  $V^{(0)} = 0$  at each state, we show the following two properties:

- *Optimism:* with high probability,  $Q^{(i)}(s, a) \leq Q^*(s, a), \forall i \geq 0$ ;
- *Finite-time near-convergence:* Given any error  $\epsilon_{VI} > 0$ , the procedure stops at a *finite* iteration  $j$  such that  $\|V^{(j)} - V^{(j-1)}\|_\infty \leq \epsilon_{VI}$ , which implies that the vector  $V^{(j)}$  verifies some fixed point equation for  $\widetilde{\mathcal{L}}$  up to an error scaling with  $\epsilon_{VI}$ .

#### D.2.1 Properties of the slightly skewed transitions $\widetilde{P}$

Lem. 14 shows that the bias introduced by replacing  $\widehat{P}_{s,a}$  with  $\widetilde{P}_{s,a}$  decays inversely with  $n(s, a)$ , the number of visits to state-action pair  $(s, a)$ .

**Lemma 14.** *For any non-negative vector  $U \in \mathbb{R}^{S'}$  such that  $U(g) = 0$ , for any  $(s, a) \in \mathcal{S} \times \mathcal{A}$ , it holds that*

$$\widetilde{P}_{s,a}U \leq \widehat{P}_{s,a}U \leq \widetilde{P}_{s,a}U + \frac{\|U\|_\infty}{n(s, a) + 1}, \quad |\mathbb{V}(\widetilde{P}_{s,a}, U) - \mathbb{V}(\widehat{P}_{s,a}, U)| \leq \frac{2\|U\|_\infty^2 S'}{n(s, a) + 1}.$$



Denote by  $\nu$  the probability of reaching the goal from any state-action pair in  $\tilde{P}$ , i.e.,

$$\nu_{s,a} := \tilde{P}_{s,a,g}, \quad \nu := \min_{s,a} \nu_{s,a}. \quad (12)$$

By construction of  $\tilde{P}$ , the quantity  $\nu$  is strictly positive. This immediately implies the following result.

**Lemma 15.** *In the SSP-MDP associated to  $\tilde{P}$  with any bounded cost function, all policies are proper.*

**Remark 2** (Mapping to a discounted problem). In an SSP problem with only proper policies, the (optimal) Bellman operator is usually contractive only w.r.t. a weighted-sup norm [Bertsekas, 1995]. Here, the construction of  $\tilde{P}$  entails that any SSP defined on it with fixed bounded costs has a (optimal) Bellman operator that is a sup-norm contraction. In fact, the SSP problem on  $\tilde{P}$  can be cast as a discounted problem with a (state-action dependent) discount factor  $\gamma_{s,a} := 1 - \nu_{s,a} < 1$  (we recall that discounted MDPs are a subclass of SSP-MDPs). Intuitively, at insufficiently visited state-action pairs, the agent behaves optimistically which increases the chance of reaching the goal and terminating the trajectory. Equivalently, we can interpret the agent as being uncertain about its future predictions and it is thus encouraged to act more myopically, which is connected to lowering the discount factor in the discounted RL setting.

## D.2.2 Important auxiliary function $f$ and its properties

Lem. 16 examines an auxiliary function  $f$  that plays a key role in the analysis. Indeed, we see that an instantiation of  $f$  surfaces in the definition of the operator  $\tilde{\mathcal{L}}$  (Eq. 11). While the first property (monotonicity) is similar to the one required in Zhang et al. [2021a], the third property (contraction) is SSP-specific and is crucial to guarantee the (finite-time) near-convergence of a VISGO procedure.

**Lemma 16.** *Let  $\Upsilon := \{v \in \mathbb{R}^{S'} : v \geq 0, v(g) = 0, \|v\|_\infty \leq B\}$ . Let  $f : \Delta^{S'} \times \Upsilon \times \mathbb{R} \times \mathbb{R} \times \mathbb{R} \rightarrow \mathbb{R}$  with  $f(p, v, n, B, \iota) := pv - \max \left\{ c_1 \sqrt{\frac{\mathbb{V}(p,v)\iota}{n}}, c_2 \frac{B\iota}{n} \right\}$ , with  $c_1 = 6$  and  $c_2 = 36$  (here taking any pair of constants such that  $c_1^2 \leq c_2$  works). Then  $f$  satisfies, for all  $p \in \Delta^{S'}$ ,  $v \in \Upsilon$  and  $n, \iota > 0$ ,*

1.  $f(p, v, n, B, \iota)$  is non-decreasing in  $v(s)$ , i.e.,

$$\forall (v, v') \in \Upsilon^2, v \leq v' \implies f(p, v, n, B, \iota) \leq f(p, v', n, B, \iota);$$

2.  $f(p, v, n, B, \iota) \leq pv - \frac{c_1}{2} \sqrt{\frac{\mathbb{V}(p,v)\iota}{n}} - \frac{c_2}{2} \frac{B\iota}{n} \leq pv - 2\sqrt{\frac{\mathbb{V}(p,v)\iota}{n}} - 14\frac{B\iota}{n}$ ;

3. If  $p(g) > 0$ , then  $f(p, v, n, B, \iota)$  is  $\rho_p$ -contractive in  $v(s)$ , with  $\rho_p := 1 - p(g) < 1$ , i.e.,

$$\forall (v, v') \in \Upsilon^2, |f(p, v, n, B, \iota) - f(p, v', n, B, \iota)| \leq \rho_p \|v - v'\|_\infty.$$

## D.2.3 Optimism of VISGO

We now show that with the bonus defined in Eq. 2, the  $Q$ -function is always optimistic with high probability.

**Lemma 17.** *Conditioned on the event  $\mathcal{E}$ , for any output  $Q$  of the VISGO procedure (line 22 of Alg. 1) and for any state-action pair  $(s, a) \in \mathcal{S} \times \mathcal{A}$ , it holds that*

$$Q(s, a) \leq Q^*(s, a).$$

*Proof idea.* We prove the result by induction on the inner iterations  $i$  of VISGO, i.e.,  $Q^{(i)}(s, a) \leq Q^*(s, a)$ . We use the update of the  $Q$ -value (line 3), Lem. 14, the definition of event  $\mathcal{E}$  combined with the fact that  $B \geq B_*$ , as well as the first two properties of Lem. 16 applied to  $f(\tilde{P}_{s,a}, V^{(i)}, n^+(s, a), B, \iota_{s,a})$ .  $\square$

## D.2.4 Finite-time near-convergence of VISGO

**Warm-up: convergence with no bonuses.** For the sake of discussion, let us first examine an idealized case where  $n(s, a) \rightarrow +\infty$  for all  $(s, a)$ , which means  $b(s, a) = 0$  for all  $(s, a)$ . In that case, the

iterates verify  $V^{(i+1)} = \tilde{\mathcal{L}}^* V^{(i)}$ , where  $\tilde{\mathcal{L}}^* U(s) := \min_a \{c(s, a) + \tilde{P}_{s,a} U\}$ ,  $\forall U \in \mathbb{R}^{\mathcal{S}}$ ,  $s \in \mathcal{S}$ . Thus  $\tilde{\mathcal{L}}^*$  is the optimal Bellman operator of the SSP instance  $\tilde{M}$  with transitions  $\tilde{P}$  and cost function  $c$ . From Lem. 15, all policies are proper in  $\tilde{M}$ . As a result, the operator  $\tilde{\mathcal{L}}^*$  is contractive (cf. Remark 2) and convergent [Bertsekas, 1995].

**Convergence with bonuses.** In VISGO, however, we must account for the bonuses  $b(s, a)$ . Setting aside the truncation of each iterate  $V^{(i)}$  (i.e., the lower bounding by 0), we notice that an update for  $V^{(i+1)}$  can be interpreted as the (truncated) Bellman operator of an SSP problem with cost function  $c(s, a) - b^{(i+1)}(s, a)$ . However,  $b^{(i+1)}(s, a)$  depends on  $V^{(i)}$ , the previous iterate. This dependence means that the cost function is no longer fixed and the reasoning from the previous paragraph no longer holds. As a result, we directly analyze the properties of the operator  $\tilde{\mathcal{L}}$  that defines the sequence of iterates  $V^{(i+1)} = \tilde{\mathcal{L}} V^{(i)}$  in VISGO (Eq. 11).

**Lemma 18.** *The sequence  $(V^{(i)})_{i \geq 0}$  is non-decreasing. Combining this with the fact that it is upper bounded by  $V^*$  from Lem. 17, the sequence must converge.*

While Lem. 18 states that  $\tilde{\mathcal{L}}$  ultimately converges starting from a vector of zeros, the following result guarantees that it can approximate in finite time its fixed point within any (arbitrarily small) positive component-wise accuracy.

**Lemma 19.** *Denote by  $\nu > 0$  the probability of reaching the goal from any state-action pair in  $\tilde{P}$ , i.e.,  $\nu := \min_{s,a} \tilde{P}_{s,a,g}$ . Then  $\tilde{\mathcal{L}}$  is a  $\rho$ -contractive operator with modulus  $\rho := 1 - \nu < 1$ .*

*Proof idea.* We can apply the third property (contraction) of Lem. 16 to  $f(\tilde{P}_{s,a}, V^{(i)}, n^+(s, a), B, t_{s,a})$ , for any state-action pair  $(s, a)$ . Taking the maximum over  $(s, a)$  pairs yields the contraction property of  $\tilde{\mathcal{L}}$ .  $\square$

**Remark 3.** Lem. 19 guarantees that  $\|V^{(i+1)} - V^{(i)}\|_\infty \leq \epsilon_{v1}$  for  $i \geq \frac{\log(\max\{B_*, 1\}/\epsilon_{v1})}{1-\rho}$ , which yields the desired property of finite-time near-convergence of VISGO (i.e., it always stops at a finite iteration  $i$ ). Moreover, by definition of  $\epsilon_{v1}$  we have  $\log(1/\epsilon_{v1}) = O(SA \log(T))$ , the (possibly loose) lower bound  $1 - \rho = \nu \geq \frac{1}{T+1}$ , and there are at most  $O(SA \log T)$  VISGO procedures in total, thus we see that EB-SSP has a polynomially bounded computational complexity.

### D.3 Interval Decomposition and Notation

**Interval decomposition.** In the analysis we split the time steps into *intervals*. The first interval begins at the first time step, and an interval ends once either (1) the goal state  $g$  is reached; (2) or the trigger condition holds (i.e., the visit to a state-action pair is doubled). We see that an update is triggered (line 13 of Alg. 1) whenever condition (2) is met.

**Notation.** We index intervals by  $m = 1, 2, \dots$  and the length of interval  $m$  is denoted by  $H^m$  (it is bounded almost surely). The trajectory visited in interval  $m$  is denoted by  $U^m = (s_1^m, a_1^m, \dots, s_{H^m}^m, a_{H^m}^m, s_{H^m+1}^m)$ , where  $a_h^m$  is the action taken in state  $s_h^m$ . The concatenation of the trajectories of the intervals up to and including interval  $m$  is denoted by  $\bar{U}^m$ , i.e.,  $\bar{U}^m = \bigcup_{m'=1}^m U^{m'}$ . Moreover,  $c_h^m$  denotes the cost in the  $h$ -th step of interval  $m$ . We use the notation  $Q^m(s, a)$ ,  $\bar{V}^m(s)$ ,  $\hat{P}_{s,a}^m$ ,  $\tilde{P}_{s,a}^m$  and  $\epsilon_{v1}^m$  to denote the values (computed in lines 14-22) of  $Q(s, a)$ ,  $V(s)$ ,  $\hat{P}_{s,a}$ ,  $\tilde{P}_{s,a}$  and  $\epsilon_{v1}$  in the beginning of interval  $m$ . Let  $n^m(s, a)$  and  $\hat{c}^m(s, a)$  denote the values of  $\max\{n(s, a), 1\}$  and  $\hat{c}(s, a)$  used for computing  $Q^m(s, a)$ . Finally, we set

$$b^m(s, a) := \max \left\{ c_1 \sqrt{\frac{\mathbb{V}(\tilde{P}_{s,a}^m, V^m)_{t_{s,a}}}{n^m(s, a)}}, c_2 \frac{B t_{s,a}}{n^m(s, a)} \right\} + c_3 \sqrt{\frac{\hat{c}^m(s, a)_{t_{s,a}}}{n^m(s, a)}} + c_4 \frac{B \sqrt{S' t_{s,a}}}{n^m(s, a)}.$$

### D.4 Bounding the Bellman Error

**Lemma 20.** *Conditioned on the event  $\mathcal{E}$ , for any interval  $m$  and state-action pair  $(s, a) \in \mathcal{S} \times \mathcal{A}$ ,*

$$|c(s, a) + P_{s,a} V^m - Q^m(s, a)| \leq \min \{ \beta^m(s, a), B_* + 1 \},$$

where we define

$$\begin{aligned} \beta^m(s, a) &:= 4b^m(s, a) + \sqrt{\frac{2\mathbb{V}(P_{s,a}, V^*)\iota_{s,a}}{n^m(s, a)}} + \sqrt{\frac{2S'\mathbb{V}(P_{s,a}, V^* - V^m)\iota_{s,a}}{n^m(s, a)}} \\ &\quad + \frac{3B_*S'\iota_{s,a}}{n^m(s, a)} + \left(1 + c_1\sqrt{\iota_{s,a}/2}\right)\epsilon_{\text{VI}}^m. \end{aligned}$$

*Proof idea.* We use that  $V^m$  approximates the fixed point of  $\tilde{\mathcal{L}}$  up to an error scaling with  $\epsilon_{\text{VI}}$ . We end up decomposing and bounding the difference  $P_{s,a}V^m - \tilde{P}_{s,a}V^m \leq (\hat{P}_{s,a} - \tilde{P}_{s,a})V^m + (P_{s,a} - \hat{P}_{s,a})V^* + (P_{s,a} - \hat{P}_{s,a})(V^m - V^*)$ , where the first term is bounded by Lem. 14 and 17, while the second and third terms are bounded using the definition of the event  $\mathcal{E}$ .  $\square$

## D.5 Regret Decomposition

We assume that the event  $\mathcal{E}$  defined in Def. 12 holds. In particular it guarantees that Lem. 17 and Lem. 20 hold for all intervals  $m$  simultaneously.

We denote by  $M$  the total number of intervals in which the first  $K$  episodes elapse. For any  $M' \leq M$ , we denote by  $\mathcal{M}_0(M')$  the set of intervals which are among the first  $M'$  intervals, and constitute the first intervals in each episode (i.e., either it is the first interval or its previous interval ended in the goal state). We also denote by  $K_{M'} := |\mathcal{M}_0(M')|$ ,  $T_{M'} := \sum_{m=1}^{M'} H^m$  and  $C_{M'} := \sum_{m=1}^{M'} \sum_{h=1}^{H^m} c_h^m$ . Note that  $K$  and  $T$  are equivalent to  $K_M$  and  $T_M$ , respectively, and  $C_{M'}$  is the cumulative cost in the first  $M'$  intervals.

Instead of bounding the regret  $R_K$  from Eq. 1, we bound  $\tilde{R}_{M'} := C_{M'} - K_{M'}V^*(s_0)$  for any fixed choice of  $M' \leq M$ , as done in Rosenberg et al. [2020]. We see that  $\tilde{R}_M = R_K$ , the true regret within  $K$  episodes. To derive Thm. 3, we will show that  $M$  is finite and instantiate  $M' = M$ . In the following we do the analysis for arbitrary  $M' \leq M$  as it will be useful for the parameter-free case studied in App. H (i.e., when no estimate  $B \geq B_*$  is available).

We decompose  $\tilde{R}_{M'}$  as follows

$$\begin{aligned} \tilde{R}_{M'} &\stackrel{(i)}{\leq} \sum_{m=1}^{M'} \sum_{h=1}^{H^m} c_h^m - \sum_{m \in \mathcal{M}_0(M')} V^m(s_0), \\ &\stackrel{(ii)}{\leq} \sum_{m=1}^{M'} \sum_{h=1}^{H^m} c_h^m + \sum_{m=1}^{M'} \left( \sum_{h=1}^{H^m} V^m(s_{h+1}^m) - V^m(s_h^m) \right) + 2SA \log_2(T_{M'}) \max_{1 \leq m \leq M'} \|V^m\|_\infty \\ &\stackrel{(iii)}{\leq} \sum_{m=1}^{M'} \sum_{h=1}^{H^m} [c_h^m + P_{s_h^m, a_h^m} V^m - V^m(s_h^m)] + \sum_{m=1}^{M'} \sum_{h=1}^{H^m} [V^m(s_{h+1}^m) - P_{s_h^m, a_h^m} V^m] \\ &\quad + 2B_*SA \log_2(T_{M'}) \\ &\stackrel{(iv)}{\leq} \underbrace{\sum_{m=1}^{M'} \sum_{h=1}^{H^m} [V^m(s_{h+1}^m) - P_{s_h^m, a_h^m} V^m]}_{:=X_1(M')} + \underbrace{\sum_{m=1}^{M'} \sum_{h=1}^{H^m} \beta^m(s_h^m, a_h^m)}_{:=X_2(M')} + \underbrace{\sum_{m=1}^{M'} \sum_{h=1}^{H^m} c_h^m - c(s_h^m, a_h^m)}_{:=X_3(M')} \\ &\quad + 2B_*SA \log_2(T_{M'}), \end{aligned}$$

where (i) uses the optimism property of Lem. 17, (ii) stems from the construction of intervals (Lem. 22), (iii) uses that  $\max_{1 \leq m \leq M'} \|V^m\|_\infty \leq B_*$  (from Lem. 17), and (iv) comes from Lem. 20. We now focus on bounding the terms  $X_1(M')$ ,  $X_2(M')$  and  $X_3(M')$ . To this end, we introduce the following useful quantities

$$X_4(M') := \sum_{m=1}^{M'} \sum_{h=1}^{H^m} \mathbb{V}(P_{s_h^m, a_h^m}, V^m), \quad X_5(M') := \sum_{m=1}^{M'} \sum_{h=1}^{H^m} \mathbb{V}(P_{s_h^m, a_h^m}, V^* - V^m).$$

### D.5.1 The $X_1(M')$ term

$X_1(M')$  could be viewed as a martingale, so by taking  $c = \max\{B_\star, 1\}$  in the technical Lem. 30, we have with probability at least  $1 - \delta$ ,

$$|X_1(M')| \leq 2\sqrt{2X_4(M')(\log_2((\max\{B_\star, 1\})^2 T_{M'}) + \ln(2/\delta))} \\ + 5(\max\{B_\star, 1\})(\log_2((\max\{B_\star, 1\})^2 T_{M'}) + \ln(2/\delta)).$$

To bound  $X_1(M')$ , we only need to bound  $X_4(M')$ .

### D.5.2 The $X_3(M')$ term

Taking  $c = 1$  in the technical Lem. 30, we have

$$\mathbb{P}\left[|X_3(M')| \geq 2\sqrt{2\sum_{m=1}^{M'}\sum_{h=1}^{H^m}\text{Var}(s_h^m, a_h^m)(\log_2(T_{M'}) + \ln(2/\delta)) + 5(\log_2(T_{M'}) + \ln(2/\delta))}\right] \leq \delta,$$

where  $\text{Var}(s_t, a_t) := \mathbb{E}[(c_t - c(s_t, a_t))^2]$  ( $c_t$  denotes the cost incurred at time step  $t$ ). By Lem. 33,

$$\begin{aligned} \sum_{m=1}^{M'}\sum_{h=1}^{H^m}\text{Var}(s_h^m, a_h^m) &\leq \sum_{m=1}^{M'}\sum_{h=1}^{H^m}c(s_h^m, a_h^m) \\ &\leq \sum_{m=1}^{M'}\sum_{h=1}^{H^m}(c(s_h^m, a_h^m) - c_h^m) + C_{M'} \\ &\leq |X_3(M')| + C_{M'}. \end{aligned}$$

Therefore we have

$$\mathbb{P}\left[|X_3(M')| \geq 2\sqrt{2(|X_3(M')| + C_{M'}) (\log_2(T_{M'}) + \ln(2/\delta))} + 5(\log_2(T_{M'}) + \ln(2/\delta))\right] \leq \delta,$$

which implies that  $|X_3(M')| \leq O\left(\log_2(T_{M'}) + \ln(2/\delta) + \sqrt{C_{M'}(\log_2(T_{M'}) + \ln(2/\delta))}\right)$  with probability at least  $1 - \delta$ .

### D.5.3 The $X_2(M')$ term

The full proof of the bound on  $X_2(M')$  is deferred to App. E.3. Here we provide a brief sketch. First, we bound  $\beta^m$  and apply a pigeonhole principle to obtain

$$\begin{aligned} X_2(M') &\leq O\left(\sqrt{SA\log_2(T_{M'})\iota_{M'}X_4(M')} + \sqrt{S^2A\log_2(T_{M'})\iota_{M'}X_5(M')}\right) \\ &\quad + \sqrt{SA\log_2(T_{M'})\iota_{M'}\sum_{m=1}^{M'}\sum_{h=1}^{H^m}\widehat{c}^m(s_h^m, a_h^m)} \\ &\quad + B_\star S^2 A \log_2(T_{M'}) + BS^{3/2} A \log_2(T_{M'})\iota_{M'} + \sum_{m=1}^{M'}\sum_{h=1}^{H^m}(1 + c_1\sqrt{\iota_{M'}/2})\epsilon_{\text{VI}}^m \end{aligned}$$

with the logarithmic term  $\iota_{M'} := \ln\left(\frac{12SAS'T_{M'}^2}{\delta}\right)$  which is the upper-bound of  $\iota_{s,a}$  when considering only time steps in the first  $M'$  intervals. The regret contributions of the estimated costs and the VISGO precision errors are respectively

$$\begin{aligned} \sum_{m=1}^{M'}\sum_{h=1}^{H^m}\widehat{c}^m(s_h^m, a_h^m) &\leq 2SA(\log_2(T_{M'}) + 1) + 2C_{M'}, \\ \sum_{m=1}^{M'}\sum_{h=1}^{H^m}(1 + c_1\sqrt{\iota_{M'}/2})\epsilon_{\text{VI}}^m &= O(SA\log_2(T_{M'})\sqrt{\iota_{M'}}). \end{aligned}$$

To bound  $X_4(M')$  and  $X_5(M')$ , we perform a recursion-based analysis on the value functions normalized by  $1/B_*$ . We split the analysis on the intervals, and not on the episodes as done in Zhang et al. [2021a]. In Lem. 24 and 25 we establish that with overwhelming probability,

$$\begin{aligned} X_4(M') &\leq O(B_*(C_{M'} + X_2(M')) + (B_*^2 SA + B_*)(\log_2(T_{M'}) + \ln(2/\delta))), \\ X_5(M') &\leq O(B_*^2 SA(\log_2(T_{M'}) + \ln(2/\delta)) + B_* X_2(M')). \end{aligned}$$

As a result, we obtain

$$\begin{aligned} X_2(M') &\leq O\left(\sqrt{SAX_4(M')\bar{l}_{M'}} + \sqrt{S^2AX_5(M')\bar{l}_{M'}} \right. \\ &\quad \left. + SA\bar{l}_{M'}^{3/2} + \sqrt{SAC_{M'}\bar{l}_{M'}} + B_*S^2A\bar{l}_{M'}^2 + BS^{3/2}A\bar{l}_{M'}^2\right), \\ X_4(M') &\leq O(B_*(C_{M'} + X_2(M')) + (B_*^2 SA + B_*)\bar{l}_{M'}), \\ X_5(M') &\leq O(B_*^2 SA\bar{l}_{M'} + B_* X_2(M')). \end{aligned}$$

with the logarithmic term  $\bar{l}_{M'} := \ln\left(\frac{12SAS'T_{M'}^2}{\delta}\right) + \log_2((\max\{B_*, 1\})^2 T_{M'}) + \ln\left(\frac{2}{\delta}\right)$ . Isolating the  $X_2(M')$  term finally yields

$$X_2(M') \leq O((\sqrt{B_*} + 1)\sqrt{SAC_{M'}\bar{l}_{M'}} + BS^2A\bar{l}_{M'}^2).$$

#### D.5.4 Putting Everything Together

Ultimately, with probability at least  $1 - 6\delta$  we have

$$\begin{aligned} \tilde{R}_{M'} &\leq X_1(M') + X_2(M') + X_3(M') + 2B_*SA\log_2(T_{M'}) \\ &\leq O((\sqrt{B_*} + 1)\sqrt{SAC_{M'}\bar{l}_{M'}} + BS^2A\bar{l}_{M'}^2). \end{aligned}$$

Noting that  $\tilde{R}_{M'} = C_{M'} - K_{M'}V^*(s_0)$ , we have

$$\begin{aligned} C_{M'} &\leq K_{M'}V^*(s_0) + O((\sqrt{B_*} + 1)\sqrt{SAC_{M'}\bar{l}_{M'}} + BS^2A\bar{l}_{M'}^2), \\ C_{M'} &\stackrel{(i)}{\leq} \left( O((\sqrt{B_*} + 1)\sqrt{SA\bar{l}_{M'}}) + \sqrt{K_{M'}V^*(s_0) + O(BS^2A\bar{l}_{M'}^2)} \right)^2 \\ &\leq K_{M'}V^*(s_0) + O((\sqrt{B_*} + 1)\sqrt{V^*(s_0)SAK_{M'}\bar{l}_{M'}} + BS^2A\bar{l}_{M'}^2) \\ &\leq K_{M'}V^*(s_0) + O((B_* + \sqrt{B_*})\sqrt{SAK_{M'}\bar{l}_{M'}} + BS^2A\bar{l}_{M'}^2), \end{aligned}$$

where (i) uses Lem. 35,  $V^*(s_0) \leq B_*$  and  $\sqrt{B_*} + 1 \leq O(\sqrt{B_* + 1}) \leq O(\sqrt{B_*})$ . Hence

$$\tilde{R}_{M'} \leq O\left(\sqrt{(B_*^2 + B_*)SAK_{M'}\bar{l}_{M'}} + BS^2A\bar{l}_{M'}^2\right).$$

By scaling  $\delta \leftarrow \delta/6$  we have the following important bound

$$\begin{aligned} \tilde{R}_{M'} &\leq O\left(\sqrt{(B_*^2 + B_*)SAK_{M'}} \log\left(\frac{\max\{B_*, 1\}SAT_{M'}}{\delta}\right) \right. \\ &\quad \left. + BS^2A \log^2\left(\frac{\max\{B_*, 1\}SAT_{M'}}{\delta}\right)\right). \end{aligned} \tag{13}$$

The proof of Thm. 3 is concluded by taking  $M' = M$ , where  $M$  denotes the number of intervals in which the first  $K$  episodes elapse.

## E Missing Proofs

### E.1 Proofs of Lemmas 14, 16, 17, 18, 19, 20

**Restatement of Lemma 14.** For any non-negative vector  $U \in \mathbb{R}^{S'}$  such that  $U(g) = 0$ , for any  $(s, a) \in \mathcal{S} \times \mathcal{A}$ , it holds that

$$\tilde{P}_{s,a}U \leq \hat{P}_{s,a}U \leq \tilde{P}_{s,a}U + \frac{\|U\|_\infty}{n(s, a) + 1}, \quad |\mathbb{V}(\tilde{P}_{s,a}, U) - \mathbb{V}(\hat{P}_{s,a}, U)| \leq \frac{2\|U\|_\infty^2 S'}{n(s, a) + 1}.$$

*Proof.* The proof uses the definition of  $\tilde{P}$  (Eq. 5) and simple algebraic manipulation. For any  $s' \neq g$ , we have  $\tilde{P}_{s,a,s'} \leq \hat{P}_{s,a,s'}$  and  $U(s') \geq 0$ , as well as  $U(g) = 0$ , so  $\tilde{P}_{s,a}U \leq \hat{P}_{s,a}U$ , and

$$(\hat{P}_{s,a} - \tilde{P}_{s,a})U = \left(1 - \frac{n(s,a)}{n(s,a)+1}\right)\hat{P}_{s,a}U \leq \frac{\|U\|_\infty}{n(s,a)+1}.$$

In addition, for any  $s' \in \mathcal{S}'$ ,

$$|\tilde{P}_{s,a,s'} - \hat{P}_{s,a,s'}| \leq \left| \frac{n(s,a)}{n(s,a)+1} - 1 \right| \hat{P}_{s,a,s'} + \frac{\mathbb{I}[s'=g]}{n(s,a)+1} \leq \frac{2}{n(s,a)+1}.$$

Therefore we have that

$$\begin{aligned} \mathbb{V}(\hat{P}_{s,a}, U) &= \sum_{s' \in \mathcal{S}'} \hat{P}_{s,a,s'} (U(s') - \hat{P}_{s,a}U)^2 \leq \sum_{s' \in \mathcal{S}'} \hat{P}_{s,a,s'} (U(s') - \tilde{P}_{s,a}U)^2 \\ &\leq \sum_{s' \in \mathcal{S}'} \left( \tilde{P}_{s,a,s'} + \frac{2}{n(s,a)+1} \right) (U(s') - \tilde{P}_{s,a}U)^2 \leq \mathbb{V}(\tilde{P}_{s,a}, U) + \frac{2\|U\|_\infty^2 \mathcal{S}'}{n(s,a)+1}, \end{aligned}$$

where the first inequality is by the fact that  $z^* = \sum_i p_i x_i$  minimizes the quantity  $\sum_i p_i (x_i - z)^2$ . Conversely,

$$\begin{aligned} \mathbb{V}(\tilde{P}_{s,a}, U) &= \sum_{s' \in \mathcal{S}'} \tilde{P}_{s,a,s'} (U(s') - \tilde{P}_{s,a}U)^2 \leq \sum_{s' \in \mathcal{S}'} \tilde{P}_{s,a,s'} (U(s') - \hat{P}_{s,a}U)^2 \\ &\leq \sum_{s' \in \mathcal{S}'} \left( \hat{P}_{s,a,s'} + \frac{2}{n(s,a)+1} \right) (U(s') - \hat{P}_{s,a}U)^2 \leq \mathbb{V}(\hat{P}_{s,a}, U) + \frac{2\|U\|_\infty^2 \mathcal{S}'}{n(s,a)+1}. \end{aligned}$$

□

**Restatement of Lemma 16.** Let  $\Upsilon := \{v \in \mathbb{R}^{\mathcal{S}'} : v \geq 0, v(g) = 0, \|v\|_\infty \leq B\}$ . Let  $f : \Delta^{\mathcal{S}'} \times \Upsilon \times \mathbb{R} \times \mathbb{R} \times \mathbb{R} \rightarrow \mathbb{R}$  with  $f(p, v, n, B, \iota) := pv - \max \left\{ c_1 \sqrt{\frac{\mathbb{V}(p,v)\iota}{n}}, c_2 \frac{B\iota}{n} \right\}$ , with  $c_1 = 6$  and  $c_2 = 36$  (here taking any pair of constants such that  $c_1^2 \leq c_2$  works). Then  $f$  satisfies, for all  $p \in \Delta^{\mathcal{S}'}, v \in \Upsilon$  and  $n, \iota > 0$ ,

1.  $f(p, v, n, B, \iota)$  is non-decreasing in  $v(s)$ , i.e.,

$$\forall (v, v') \in \Upsilon^2, v \leq v' \implies f(p, v, n, B, \iota) \leq f(p, v', n, B, \iota);$$

2.  $f(p, v, n, B, \iota) \leq pv - \frac{c_1}{2} \sqrt{\frac{\mathbb{V}(p,v)\iota}{n}} - \frac{c_2}{2} \frac{B\iota}{n} \leq pv - 2\sqrt{\frac{\mathbb{V}(p,v)\iota}{n}} - 14\frac{B\iota}{n}$ ;

3. If  $p(g) > 0$ , then  $f(p, v, n, B, \iota)$  is  $\rho_p$ -contractive in  $v(s)$ , with  $\rho_p := 1 - p(g) < 1$ , i.e.,

$$\forall (v, v') \in \Upsilon^2, |f(p, v, n, B, \iota) - f(p, v', n, B, \iota)| \leq \rho_p \|v - v'\|_\infty.$$

*Proof.* The second claim holds by  $\max\{x, y\} \geq (x+y)/2, \forall x, y$ , by the choices of  $c_1, c_2$  and because both  $\sqrt{\frac{\mathbb{V}(p,v)\iota}{n}}$  and  $\frac{B\iota}{n}$  are non-negative. To verify the first and third claims, we fix all other variables but  $v(s)$  and view  $f$  as a function in  $v(s)$ . Because the derivative of  $f$  in  $v(s)$  does not exist only when  $c_1 \sqrt{\frac{\mathbb{V}(p,v)\iota}{n}} = c_2 \frac{B\iota}{n}$ , where the condition has at most two solutions, it suffices to prove that  $\frac{\partial f}{\partial v(s)} \geq 0$  when  $c_1 \sqrt{\frac{\mathbb{V}(p,v)\iota}{n}} \neq c_2 \frac{B\iota}{n}$ . Direct computation gives

$$\begin{aligned} \frac{\partial f}{\partial v(s)} &= p(s) - c_1 \mathbb{I} \left[ c_1 \sqrt{\frac{\mathbb{V}(p,v)\iota}{n}} \geq c_2 \frac{B\iota}{n} \right] \frac{p(s)(v(s) - pv)\iota}{\sqrt{n\mathbb{V}(p,v)\iota}} \\ &\geq \min \left\{ p(s), p(s) - \frac{c_1^2}{c_2 B} p(s)(v(s) - pv) \right\} \\ &\stackrel{(i)}{\geq} \min \left\{ p(s), p(s) - \frac{c_1^2}{c_2} p(s) \right\} \end{aligned}$$

$$\geq p(s) \left(1 - \frac{c_1^2}{c_2}\right) = 0.$$

Here (i) is by  $v(s) - pv \leq v(s) \leq B$ . For the third claim, we perform a distinction of cases. If  $c_1 \sqrt{\frac{\mathbb{V}(p,v)\iota}{n}} = c_2 \frac{B\iota}{n}$ , where the condition has at most two solutions, then  $f(v) = pv - c_2 \frac{B\iota}{n}$ , which corresponds to a  $\rho_p$ -contraction since

$$|f(v_1) - f(v_2)| = \left| \sum_{s \in \mathcal{S}} p(s)(v_1(s) - v_2(s)) \right| \leq \sum_{s \in \mathcal{S}} p(s) \cdot \|v_1 - v_2\|_\infty = (1 - p(g)) \|v_1 - v_2\|_\infty.$$

Otherwise  $c_1 \sqrt{\frac{\mathbb{V}(p,v)\iota}{n}} \neq c_2 \frac{B\iota}{n}$ , then the derivative of  $f$  in  $v(s)$  exists and it verifies

$$\begin{aligned} \left\| \frac{\partial f}{\partial v} \right\|_1 &= \sum_{s \in \mathcal{S}} \left| \frac{\partial f}{\partial v(s)} \right| = \sum_{s \in \mathcal{S}} \frac{\partial f}{\partial v(s)} \\ &= \sum_{s \in \mathcal{S}} \left[ p(s) - c_1 \mathbb{I} \left[ c_1 \sqrt{\frac{\mathbb{V}(p,v)\iota}{n}} \geq c_2 \frac{B\iota}{n} \right] \frac{p(s)(v(s) - pv)\iota}{\sqrt{n\mathbb{V}(p,v)\iota}} \right] \\ &= 1 - p(g) - c_1 \mathbb{I} \left[ c_1 \sqrt{\frac{\mathbb{V}(p,v)\iota}{n}} \geq c_2 \frac{B\iota}{n} \right] \sqrt{\frac{\iota}{n\mathbb{V}(p,v)}} [pv - (1 - p(g)) \cdot pv] \\ &\leq 1 - p(g). \end{aligned}$$

In this case, by the mean value theorem we obtain that  $f$  is  $\rho_p$ -contractive.  $\square$

**Restatement of Lemma 17.** Conditioned on the event  $\mathcal{E}$ , for any output  $Q$  of the VISGO procedure (line 22 of Alg. 1) and for any state-action pair  $(s, a) \in \mathcal{S} \times \mathcal{A}$ , it holds that

$$Q(s, a) \leq Q^*(s, a).$$

*Proof.* We prove by induction that for any inner iteration  $i$  of VISGO,  $Q^{(i)}(s, a) \leq Q^*(s, a)$ . By definition we have  $Q^{(0)} = 0 \leq Q^*$ . Assume that the property holds for iteration  $i$ , then

$$Q^{(i+1)}(s, a) = \max \{ \widehat{c}(s, a) + \widetilde{P}_{s,a} V^{(i)} - b^{(i+1)}(s, a), 0 \},$$

where

$$\begin{aligned} &\widehat{c}(s, a) + \widetilde{P}_{s,a} V^{(i)} - b^{(i+1)}(s, a) \\ &= \widehat{c}(s, a) + \widetilde{P}_{s,a} V^{(i)} - \max \left\{ c_1 \sqrt{\frac{\mathbb{V}(\widetilde{P}_{s,a}, V^{(i)})_{\iota_{s,a}}}{n^+(s, a)}}, c_2 \frac{B\iota_{s,a}}{n^+(s, a)} \right\} - c_3 \sqrt{\frac{\widehat{c}(s, a)_{\iota_{s,a}}}{n^+(s, a)}} - c_4 \frac{B\sqrt{S'_{\iota_{s,a}}}}{n^+(s, a)} \\ &\stackrel{(i)}{\leq} c(s, a) + \widetilde{P}_{s,a} V^{(i)} - \max \left\{ c_1 \sqrt{\frac{\mathbb{V}(\widetilde{P}_{s,a}, V^{(i)})_{\iota_{s,a}}}{n^+(s, a)}}, c_2 \frac{B\iota_{s,a}}{n^+(s, a)} \right\} + \frac{28\iota_{s,a}}{3n^+(s, a)} - c_4 \frac{B\sqrt{S'_{\iota_{s,a}}}}{n^+(s, a)} \\ &= c(s, a) + f(\widetilde{P}_{s,a}, V^{(i)}, n^+(s, a), B, \iota_{s,a}) + \frac{28\iota_{s,a}}{3n^+(s, a)} - c_4 \frac{B\sqrt{S'_{\iota_{s,a}}}}{n^+(s, a)} \\ &\stackrel{(ii)}{\leq} c(s, a) + f(\widetilde{P}_{s,a}, V^*, n^+(s, a), B, \iota_{s,a}) + \frac{28\iota_{s,a}}{3n^+(s, a)} - c_4 \frac{B\sqrt{S'_{\iota_{s,a}}}}{n^+(s, a)} \\ &\stackrel{(iii)}{\leq} c(s, a) + \widetilde{P}_{s,a} V^* - 2\sqrt{\frac{\mathbb{V}(\widetilde{P}_{s,a}, V^*)_{\iota_{s,a}}}{n^+(s, a)}} - \frac{14B\iota_{s,a}}{3n^+(s, a)} - c_4 \frac{B\sqrt{S'_{\iota_{s,a}}}}{n^+(s, a)} \\ &\stackrel{(iv)}{\leq} c(s, a) + \widehat{P}_{s,a} V^* - 2\sqrt{\frac{\mathbb{V}(\widehat{P}_{s,a}, V^*)_{\iota_{s,a}}}{n^+(s, a)}} - \frac{14B\iota_{s,a}}{3n^+(s, a)} - c_4 \frac{B\sqrt{S'_{\iota_{s,a}}}}{n^+(s, a)} \\ &\stackrel{(v)}{\leq} c(s, a) + P_{s,a} V^* + 2\sqrt{\frac{\mathbb{V}(\widehat{P}_{s,a}, V^*)_{\iota_{s,a}}}{n^+(s, a)}} - 2\sqrt{\frac{\mathbb{V}(\widetilde{P}_{s,a}, V^*)_{\iota_{s,a}}}{n^+(s, a)}} - (B - B_*) \frac{14\iota_{s,a}}{3n^+(s, a)} - c_4 \frac{B\sqrt{S'_{\iota_{s,a}}}}{n^+(s, a)} \\ &\stackrel{(vi)}{\leq} c(s, a) + P_{s,a} V^* + 2\sqrt{\frac{|\mathbb{V}(\widehat{P}_{s,a}, V^*) - \mathbb{V}(\widetilde{P}_{s,a}, V^*)|_{\iota_{s,a}}}{n^+(s, a)}} - (B - B_*) \frac{14\iota_{s,a}}{3n^+(s, a)} - c_4 \frac{B\sqrt{S'_{\iota_{s,a}}}}{n^+(s, a)} \end{aligned}$$

$$\begin{aligned}
&\stackrel{\text{(vii)}}{\leq} \underbrace{c(s, a) + P_{s,a} V^*}_{=Q^*(s, a)} - (B - B_*) \left( \frac{14t_{s,a}}{3n^+(s, a)} + \frac{2\sqrt{2S't_{s,a}}}{n^+(s, a)} \right) \\
&\leq Q^*(s, a),
\end{aligned}$$

where (i) is by definition of  $\mathcal{E}_2$  and choice of  $c_3$ , (ii) uses the first property of Lem. 16 and the induction hypothesis that  $V^{(i)} \leq V^*$ , (iii) uses the second property of Lem. 16 and assumption  $B \geq \max\{B_*, 1\}$ , (iv) uses Lem. 14, (v) is by definition of  $\mathcal{E}_1$ , (vi) uses the inequality  $|\sqrt{x} - \sqrt{y}| \leq \sqrt{|x - y|}$ ,  $\forall x, y \geq 0$ , and (vii) uses the second inequality of Lem. 14 and the choice of  $c_4$ . Ultimately,

$$Q^{(i+1)}(s, a) \leq \max\{Q^*(s, a), 0\} \leq Q^*(s, a).$$

□

**Restatement of Lemma 18.** The sequence  $(V^{(i)})_{i \geq 0}$  is non-decreasing. Combining this with the fact that it is upper bounded by  $V^*$  from Lem. 17, the sequence must converge.

*Proof.* We recognize that  $V^{(i+1)}(s) \leftarrow \min_a Q^{(i+1)}(s, a)$ , with

$$Q^{(i+1)}(s, a) \leftarrow \max \left\{ \widehat{c}(s, a) + \underbrace{f(\widetilde{P}_{s,a}, V^{(i)}, n^+(s, a), B, t_{s,a})}_{:=g_{s,a}(V^{(i)})} - c_3 \sqrt{\frac{\widehat{c}(s, a)t_{s,a}}{n^+(s, a)}} - c_4 \frac{B\sqrt{S't_{s,a}}}{n^+(s, a)}, 0 \right\},$$

where we introduce the function  $g_{s,a}(V) := f(\widetilde{P}_{s,a}, V, n^+(s, a), B, t_{s,a})$  for notational ease as all other parameters (apart from  $V$ ) will remain the same throughout the analysis.

We prove by induction on the iterations indexed by  $i$  that  $Q^{(i)} \leq Q^{(i+1)}$ . First,  $Q^{(0)} = 0 \leq Q^{(1)}$ . Now assume that  $Q^{(i-1)} \leq Q^{(i)}$ . Then

$$\begin{aligned}
Q^{(i+1)}(s, a) &= \max \left\{ \widehat{c}(s, a) + g_{s,a}(V^{(i)}) - c_3 \sqrt{\frac{\widehat{c}(s, a)t_{s,a}}{n^+(s, a)}} - c_4 \frac{B\sqrt{S't_{s,a}}}{n^+(s, a)}, 0 \right\} \\
&\geq \max \left\{ \widehat{c}(s, a) + g_{s,a}(V^{(i-1)}) - c_3 \sqrt{\frac{\widehat{c}(s, a)t_{s,a}}{n^+(s, a)}} - c_4 \frac{B\sqrt{S't_{s,a}}}{n^+(s, a)}, 0 \right\} \\
&= Q^{(i)}(s, a),
\end{aligned}$$

where the inequality uses the induction hypothesis  $V^{(i)} \geq V^{(i-1)}$  and the fact that  $g_{s,a}$  is non-decreasing from the first claim of Lem. 16. □

**Restatement of Lemma 19.** Denote by  $\nu > 0$  the probability of reaching the goal from any state-action pair in  $\widetilde{P}$ , i.e.,  $\nu := \min_{s,a} \widetilde{P}_{s,a,g}$ . Then  $\widetilde{\mathcal{L}}$  is a  $\rho$ -contractive operator with modulus  $\rho := 1 - \nu < 1$ .

*Proof.* Take any two vectors  $U_1, U_2$ , then for any state  $s \in \mathcal{S}$ ,

$$\begin{aligned}
|\widetilde{\mathcal{L}}U_1(s) - \widetilde{\mathcal{L}}U_2(s)| &= \left| \min_a \widetilde{\mathcal{L}}U_1(s, a) - \min_a \widetilde{\mathcal{L}}U_2(s, a) \right| \\
&\leq \left| \max_a \left\{ \widetilde{\mathcal{L}}U_1(s, a) - \widetilde{\mathcal{L}}U_2(s, a) \right\} \right|,
\end{aligned}$$

and we have that for any action  $a \in \mathcal{A}$ ,

$$\begin{aligned}
|\widetilde{\mathcal{L}}U_1(s, a) - \widetilde{\mathcal{L}}U_2(s, a)| &\leq \left| \max \{ \widehat{c}(s, a) + g_{s,a}(U_1), 0 \} - \max \{ \widehat{c}(s, a) + g_{s,a}(U_2), 0 \} \right| \\
&\leq |g_{s,a}(U_1) - g_{s,a}(U_2)| \\
&\stackrel{\text{(i)}}{\leq} \rho_{s,a} \|U_1 - U_2\|_\infty.
\end{aligned}$$

The third claim of Lem. 16 is employed to justify inequality (i):  $g_{s,a}$  is  $\rho_{s,a}$ -contractive (where  $g_{s,a}$  is defined in the proof of Lem. 18) with (recall Eq. 12)

$$\rho_{s,a} := 1 - \widetilde{P}_{s,a,g} = 1 - \nu_{s,a}.$$

Taking the maximum over  $(s, a)$  pairs,  $\widetilde{\mathcal{L}}$  is thus  $\rho$ -contractive with modulus  $\rho := 1 - \nu < 1$ . □



**Restatement of Lemma 20.** Conditioned on the event  $\mathcal{E}$ , for any interval  $m$  and state-action pair  $(s, a) \in \mathcal{S} \times \mathcal{A}$ ,

$$|c(s, a) + P_{s,a}V^m - Q^m(s, a)| \leq \min \{ \beta^m(s, a), B_\star + 1 \},$$

where we define

$$\begin{aligned} \beta^m(s, a) := & 4b^m(s, a) + \sqrt{\frac{2\mathbb{V}(P_{s,a}, V^\star)_{\ell_{s,a}}}{n^m(s, a)}} + \sqrt{\frac{2S'\mathbb{V}(P_{s,a}, V^\star - V^m)_{\ell_{s,a}}}{n^m(s, a)}} \\ & + \frac{3B_\star S'_{\ell_{s,a}}}{n^m(s, a)} + \left(1 + c_1 \sqrt{\ell_{s,a}/2}\right) \epsilon_{\text{VI}}^m. \end{aligned}$$

*Proof.* First we see that  $c(s, a) + P_{s,a}V^m - Q^m(s, a) \leq c(s, a) + P_{s,a}V^\star = Q^\star(s, a) \leq B_\star + 1$  and that  $Q^m(s, a) - c(s, a) - P_{s,a}V^m \leq Q^\star(s, a) \leq B_\star + 1$ , from Lem. 17 and the Bellman optimality equation (Lem. 2). Now we prove that  $|c(s, a) + P_{s,a}V^m - Q^m(s, a)| \leq \beta^m(s, a)$ .

**Bounding  $c(s, a) + P_{s,a}V^m - Q^m(s, a)$ .** From the VISGO loop of Alg. 1, the vectors  $Q^m$  and  $V^m$  can be associated to a finite iteration  $l$  of a sequence of vectors  $(Q^{(i)})_{i \geq 0}$  and  $(V^{(i)})_{i \geq 0}$  such that

- (i)  $Q^m(s, a) := Q^{(l)}(s, a)$ ,
- (ii)  $V^m(s) := V^{(l)}(s)$ ,
- (iii)  $\|V^{(l)} - V^{(l-1)}\|_\infty \leq \epsilon_{\text{VI}}^m$ ,
- (iv)  $b^m(s, a) := b^{(l+1)}(s, a) = \max \left\{ c_1 \sqrt{\frac{\mathbb{V}(\tilde{P}_{s,a}, V^{(l)})_{\ell_{s,a}}}{n^m(s, a)}}, c_2 \frac{B_{\ell_{s,a}}}{n^m(s, a)} \right\} + c_3 \sqrt{\frac{\widehat{c}^m(s, a)_{\ell_{s,a}}}{n^m(s, a)}} + c_4 \frac{B \sqrt{S'_{\ell_{s,a}}}}{n^m(s, a)}$ .

First, we examine the gap between the exploration bonuses at the final VISGO iterations  $l$  and  $l+1$  as follows

$$\begin{aligned} b^{(l)}(s, a) &\stackrel{(i)}{\leq} c_1 \sqrt{\frac{\mathbb{V}(\tilde{P}_{s,a}, V^{(l-1)})_{\ell_{s,a}}}{n^+(s, a)}} + c_2 \frac{B_{\ell_{s,a}}}{n^+(s, a)} + c_3 \sqrt{\frac{\widehat{c}(s, a)_{\ell_{s,a}}}{n^+(s, a)}} + c_4 \frac{B \sqrt{S'_{\ell_{s,a}}}}{n^+(s, a)} \\ &\stackrel{(ii)}{\leq} c_1 \sqrt{2 \frac{\mathbb{V}(\tilde{P}_{s,a}, V^{(l)})_{\ell_{s,a}}}{n^+(s, a)}} + c_1 \sqrt{2 \frac{\mathbb{V}(\tilde{P}_{s,a}, V^{(l-1)} - V^{(l)})_{\ell_{s,a}}}{n^+(s, a)}} + c_2 \frac{B_{\ell_{s,a}}}{n^+(s, a)} \\ &\quad + c_3 \sqrt{\frac{\widehat{c}(s, a)_{\ell_{s,a}}}{n^+(s, a)}} + c_4 \frac{B \sqrt{S'_{\ell_{s,a}}}}{n^+(s, a)} \\ &\stackrel{(iii)}{\leq} 2\sqrt{2}b^{(l+1)}(s, a) + c_1 \sqrt{\frac{(\epsilon_{\text{VI}}^m)^2_{\ell_{s,a}}}{2n^+(s, a)}} \\ &\leq 2\sqrt{2}b^{(l+1)}(s, a) + \epsilon_{\text{VI}}^m c_1 \sqrt{\ell_{s,a}/2}, \end{aligned}$$

where (i) uses  $\max\{x, y\} \leq x + y$ ; (ii) uses  $\mathbb{V}(P, X + Y) \leq 2(\mathbb{V}(P, X) + \mathbb{V}(P, Y))$  and  $\sqrt{x + y} \leq \sqrt{x} + \sqrt{y}$ ; (iii) uses  $x + y \leq 2 \max\{x, y\}$  and Popoviciu's inequality (Lem. 28) applied to  $V^{(l-1)} - V^{(l)} \in [-\epsilon_{\text{VI}}^m, 0]$ . Moreover, we have that  $Q^{(l)}(s, a) \geq \widehat{c}(s, a) + \tilde{P}_{s,a}V^{(l-1)} - b^{(l)}(s, a)$  from Eq. 3. Combining everything yields

$$\begin{aligned} -Q^m(s, a) &\leq -\widehat{c}(s, a) - \tilde{P}_{s,a}(V^m - \epsilon_{\text{VI}}) + \epsilon_{\text{VI}}c_1 \sqrt{\ell_{s,a}/2} + 2\sqrt{2}b^m(s, a) \\ &\leq -\widehat{c}(s, a) - \tilde{P}_{s,a}V^m + 2\sqrt{2}b^m(s, a) + \left(1 + c_1 \sqrt{\ell_{s,a}/2}\right) \epsilon_{\text{VI}}^m. \end{aligned}$$

Therefore, we have

$$\begin{aligned} c(s, a) + P_{s,a}V^m - Q^m(s, a) &\leq c(s, a) + P_{s,a}V^m - \widehat{c}^m(s, a) - \tilde{P}_{s,a}V^m + 2\sqrt{2}b^m(s, a) + \left(1 + c_1 \sqrt{\ell_{s,a}/2}\right) \epsilon_{\text{VI}}^m \\ &\stackrel{(i)}{\leq} P_{s,a}V^m - \widehat{P}_{s,a}V^m + \frac{B_\star}{n^m(s, a) + 1} + 4b^m(s, a) + \left(1 + c_1 \sqrt{\ell_{s,a}/2}\right) \epsilon_{\text{VI}}^m \end{aligned}$$

$$\leq \underbrace{(P_{s,a} - \widehat{P}_{s,a})V^*}_{:=Y_1} + \underbrace{(P_{s,a} - \widehat{P}_{s,a})(V^m - V^*)}_{:=Y_2} + \frac{B_\star}{n^m(s,a)} + 4b^m(s,a) + \left(1 + c_1\sqrt{\iota_{s,a}/2}\right)\epsilon_{\text{VI}}^m,$$

where (i) comes from Lem. 14, the event  $\mathcal{E}_2$ , Lem. 17 and (loosely) bounding  $|c(s,a) - \widehat{c}(s,a)| \leq b^m(s,a)$ . It holds under the event  $\mathcal{E}_1$  that

$$|Y_1| \leq \sqrt{\frac{2\mathbb{V}(P_{s,a}, V^*)\iota_{s,a}}{n^m(s,a)}} + \frac{B_\star\iota_{s,a}}{n^m(s,a)}.$$

Moreover, we have

$$\begin{aligned} |Y_2| &\stackrel{(i)}{=} \left| \sum_{s'} (\widehat{P}_{s,a,s'} - P_{s,a,s'}) (V^m(s') - V^*(s') - P_{s,a}(V^m - V^*)) \right| \\ &\leq \sum_{s'} |P_{s,a,s'} - \widehat{P}_{s,a,s'}| |V^m(s') - V^*(s') - P_{s,a}(V^m - V^*)| \\ &\stackrel{(ii)}{\leq} \sum_{s'} \sqrt{\frac{2P_{s,a,s'}\iota_{s,a}}{n^m(s,a)}} |V^m(s') - V^*(s') - P_{s,a}(V^m - V^*)| + \frac{B_\star S' \iota_{s,a}}{n^m(s,a)} \\ &\stackrel{(iii)}{\leq} \sqrt{\frac{2S'\mathbb{V}(P_{s,a}, V^m - V^*)\iota_{s,a}}{n^m(s,a)}} + \frac{B_\star S' \iota_{s,a}}{n^m(s,a)}, \end{aligned}$$

where the shift performed in (i) is by  $\sum_{s'} P_{s,a,s'} = \sum_{s'} \widehat{P}_{s,a,s'} = 1$ ; (ii) holds under the event  $\mathcal{E}_3$  and Lem. 17 ( $V^m(s) \in [0, B_\star]$ ); (iii) is by Cauchy-Schwarz inequality.

**Bounding  $Q^m(s,a) - c(s,a) - P_{s,a}V^m$ .** If  $Q^m(s,a) = Q^{(l)}(s,a) = 0$ , then  $Q^m(s,a) - \widehat{c}(s,a) - P_{s,a}V^m \leq 0 \leq \min\{\beta^m(s,a), B_\star\}$ . Otherwise, we have  $Q^m(s,a) = Q^{(l)}(s,a) = \widehat{c}(s,a) + \widehat{P}_{s,a}V^{(l-1)} - b^{(l)}(s,a)$ . Using that  $V^m \geq V^{(l-1)}$  (Lem. 18) and  $\widehat{P}_{s,a}V^m \geq \widehat{P}_{s,a}V^m$  (Lem. 14), we get

$$\begin{aligned} Q^m(s,a) - c(s,a) - P_{s,a}V^m &\leq Q^m(s,a) - \widehat{c}(s,a) - P_{s,a}V^m + b^m(s,a) \\ &= \widehat{P}_{s,a}V^{(l-1)} - b^{(l)}(s,a) - P_{s,a}V^m + b^m(s,a) \\ &\leq \widehat{P}_{s,a}V^m - P_{s,a}V^m + b^m(s,a) \\ &= (\widehat{P}_{s,a} - P_{s,a})V^* - (\widehat{P}_{s,a} - P_{s,a})(V^* - V^m) + b^m(s,a) \\ &\leq |Y_1| + |Y_2| + b^m(s,a), \end{aligned}$$

which can be bounded as above.  $\square$

## E.2 Additional lemmas

**Lemma 21.** Let  $\widetilde{Q}^m(s,a) := Q^*(s,a) - Q^m(s,a)$  and  $\widetilde{V}^m(s) := V^*(s) - V^m(s)$ . Then conditioned on the event  $\mathcal{E}$ , we have that for all  $(s,a,m,h)$ ,

$$\widetilde{V}(s_h^m) - P_{s_h^m, a_h^m} \widetilde{V}(s_{h+1}^m) \leq \beta^m(s_h^m, a_h^m).$$

*Proof.* We write that

$$\begin{aligned} \widetilde{V}^m(s_h^m) - P_{s_h^m, a_h^m} \widetilde{V}^m(s_{h+1}^m) &= V^*(s_h^m) - P_{s_h^m, a_h^m} V^* + P_{s_h^m, a_h^m} V^m - V^m(s_h^m) \\ &\leq Q^*(s_h^m, a_h^m) - P_{s_h^m, a_h^m} V^* + P_{s_h^m, a_h^m} V^m - V^m(s_h^m) \\ &\stackrel{(i)}{=} c(s_h^m, a_h^m) + P_{s_h^m, a_h^m} V^m - Q^m(s_h^m, a_h^m) \\ &\stackrel{(ii)}{\leq} \beta^m(s_h^m, a_h^m), \end{aligned}$$

where (i) uses the Bellman optimality equation (Lem. 2) and the fact that  $V^m(s_h^m) = Q^m(s_h^m, a_h^m)$ , and (ii) comes from Lem. 20.  $\square$

**Lemma 22.** For any  $M' \leq M$ , it holds that

$$\sum_{m=1}^{M'} \left( \sum_{h=1}^{H^m} V^m(s_h^m) - V^m(s_{H^m+1}^m) \right) - \sum_{m \in \mathcal{M}_0(M')} V^m(s_0) \leq 2SA \log_2(T_{M'}) \max_{1 \leq m \leq M'} \|V^m\|_\infty.$$

*Proof.* We recall that we denote by  $\mathcal{M}_0(M')$  the set of intervals among the first  $M'$  intervals that constitute the first intervals in each episode. From the analytical construction of intervals, an interval  $m < M'$  can end due to one of the following three conditions:

(i) If interval  $m$  ends in the goal state, then

$$V^{m+1}(s_1^{m+1}) - V^m(s_{H^m+1}^m) = V^{m+1}(s_0) - V^m(g) = V^{m+1}(s_0).$$

This happens for all the intervals  $m+1 \in \mathcal{M}_0(M')$ .

(ii) If interval  $m$  ends when the count to a state-action pair is doubled, then we replan with a VISGO procedure. Thus we get

$$V^{m+1}(s_1^{m+1}) - V^m(s_{H^m+1}^m) \leq V^{m+1}(s_1^{m+1}) \leq \max_{1 \leq m \leq M'} \|V^m\|_\infty.$$

This happens at most  $2SA \log_2(T_{M'})$  times.

Combining the three conditions above implies that

$$\begin{aligned} & \sum_{m=1}^{M'} \left( \sum_{h=1}^{H^m} V^m(s_h^m) - V^m(s_{H^m+1}^m) \right) \\ &= \sum_{m=1}^{M'} V^m(s_1^m) - V^m(s_{H^m+1}^m) \\ &= \sum_{m=1}^{M'-1} (V^{m+1}(s_1^{m+1}) - V^m(s_{H^m+1}^m)) + \underbrace{\sum_{m=1}^{M'-1} (V^m(s_1^m) - V^{m+1}(s_1^{m+1}))}_{=V^1(s_1^1) - V^{M'}(s_1^{M'})} + \underbrace{V^{M'}(s_1^{M'}) - V^{M'}(s_{H^{M'}+1}^{M'})}_{\leq 0} \\ &\leq \sum_{m=1}^{M'-1} (V^{m+1}(s_1^{m+1}) - V^m(s_{H^m+1}^m)) + V^1(s_0) \\ &\leq \sum_{m=1}^{M'-1} V^{m+1}(s_0) \mathbb{I}[m+1 \in \mathcal{M}_0(M')] + 2SA \log_2(T_{M'}) \max_{1 \leq m \leq M'} \|V^m\|_\infty + V^1(s_0) \\ &= \sum_{m \in \mathcal{M}_0(M')} V^m(s_0) + 2SA \log_2(T_{M'}) \max_{1 \leq m \leq M'} \|V^m\|_\infty. \end{aligned}$$

□

### E.3 Full proof of the bound on $X_2(M')$

① **First, bound  $\beta^m$ .**

Recall that we assume that the event  $\mathcal{E}$  holds. From Lem. 20, we have for any  $m, s, a$ ,

$$\begin{aligned} \beta^m(s, a) &= O \left( \sqrt{\frac{\mathbb{V}(\tilde{P}_{s,a}, V^m) \iota_{s,a}}{n^m(s, a)}} + \sqrt{\frac{\mathbb{V}(P_{s,a}, V^*) \iota_{s,a}}{n^m(s, a)}} + \sqrt{\frac{S \mathbb{V}(P_{s,a}, V^* - V^m) \iota_{s,a}}{n^m(s, a)}} \right. \\ &\quad \left. + \sqrt{\frac{\hat{c}^m(s, a) \iota_{s,a}}{n^m(s, a)}} + \frac{B_* S \iota_{s,a}}{n^m(s, a)} + \frac{B \sqrt{S} \iota_{s,a}}{n^m(s, a)} + \left( 1 + c_1 \sqrt{\iota_{s,a}/2} \right) \epsilon_{VI}^m \right). \end{aligned}$$

Here we interchange  $S'$  and  $S$  since we use the  $O()$  notation. From Lem. 14 and Lem. 17, for any  $m, s, a$ ,

$$\mathbb{V}(\tilde{P}_{s,a}, V^m) \leq \mathbb{V}(\hat{P}_{s,a}, V^m) + \frac{2B_*^2 S'}{n^m(s, a) + 1} < \mathbb{V}(\hat{P}_{s,a}, V^m) + \frac{2B_*^2 S'}{n^m(s, a)}.$$

Under the event  $\mathcal{E}_3$ , it holds that

$$\widehat{P}_{s,a,s'} \leq P_{s,a,s'} + \sqrt{\frac{2P_{s,a,s'}\iota_{s,a}}{n^m(s,a)}} + \frac{\iota_{s,a}}{n^m(s,a)} \leq \frac{3}{2}P_{s,a,s'} + \frac{2\iota_{s,a}}{n^m(s,a)}.$$

Thus, it holds that for any  $m, s, a$ ,

$$\begin{aligned} \mathbb{V}(\widehat{P}_{s,a}, V^m) &= \sum_{s'} \widehat{P}_{s,a,s'} \left( V^m(s') - \widehat{P}_{s,a} V^m \right)^2 \\ &\stackrel{(i)}{\leq} \sum_{s'} \widehat{P}_{s,a,s'} (V^m(s') - P_{s,a} V^m)^2 \\ &\leq \sum_{s'} \left( \frac{3}{2} P_{s,a,s'} + \frac{2\iota_{s,a}}{n^m(s,a)} \right) (V^m(s') - P_{s,a} V^m)^2 \\ &\leq \frac{3}{2} \mathbb{V}(P_{s,a}, V^m) + \frac{2B_\star^2 S' \iota_{s,a}}{n^m(s,a)}. \end{aligned}$$

(i) is by the fact that  $z^\star = \sum_i p_i x_i$  minimizes the quantity  $\sum_i p_i (x_i - z)^2$ . As a result,

$$\mathbb{V}(\widetilde{P}_{s,a}, V^m) < \frac{3}{2} \mathbb{V}(P_{s,a}, V^m) + \frac{2B_\star^2 S'}{n^m(s,a)} + \frac{2B_\star^2 S' \iota_{s,a}}{n^m(s,a)}.$$

Utilizing  $\mathbb{V}(P, X + Y) \leq 2(\mathbb{V}(P, X) + \mathbb{V}(P, Y))$  with  $X = V^\star - V^m$  and  $Y = V^m$  and  $\sqrt{x+y} \leq \sqrt{x} + \sqrt{y}$ , finally we have

$$\begin{aligned} \beta^m(s, a) &\leq O \left( \sqrt{\frac{\mathbb{V}(P_{s,a}, V^m) \iota_{s,a}}{n^m(s,a)}} + \sqrt{\frac{S \mathbb{V}(P_{s,a}, V^\star - V^m) \iota_{s,a}}{n^m(s,a)}} \right. \\ &\quad \left. + \sqrt{\frac{\widehat{c}(s, a) \iota_{s,a}}{n^m(s,a)}} + \frac{B_\star S \iota_{s,a}}{n^m(s,a)} + \frac{B \sqrt{S} \iota_{s,a}}{n^m(s,a)} + \left( 1 + c_1 \sqrt{\iota_{s,a}/2} \right) \epsilon_{\text{VI}}^m \right). \end{aligned}$$

## ② Second, bound a special type of summation.

**Lemma 23.** *Let  $w = \{w_h^m \geq 0 : 1 \leq m \leq M, 1 \leq h \leq H^m\}$  be a group of weights, then for any  $M' \leq M$ ,*

$$\sum_{m=1}^{M'} \sum_{h=1}^{H^m} \sqrt{\frac{w_h^m}{n^m(s_h^m, a_h^m)}} \leq O \left( \sqrt{SA \log_2(T_{M'})} \sum_{m=1}^{M'} \sum_{h=1}^{H^m} w_h^m \right).$$

*Proof.* For  $m \leq M'$ ,  $n^m(s, a) \in \{2^i : i \in \mathbb{N}, i \leq \log_2(T_{M'})\}$ . We can count the occurrences of a fixed value of  $n^m(s, a)$  by the doubling property of VISGO:  $\forall i, s, a$

$$\sum_{m=1}^{M'} \sum_{h=1}^{H^m} \mathbb{I}[(s_h^m, a_h^m) = (s, a), n^m(s, a) = 2^i] \leq 2^i.$$

Thus

$$\begin{aligned} \sum_{m=1}^{M'} \sum_{h=1}^{H^m} \frac{1}{n^m(s_h^m, a_h^m)} &= \sum_{s,a} \sum_{0 \leq i \leq \log_2(T_{M'})} \sum_{m=1}^{M'} \sum_{h=1}^{H^m} \mathbb{I}[(s_h^m, a_h^m) = (s, a), n^m(s, a) = 2^i] \frac{1}{2^i} \\ &= \sum_{s,a} \sum_{0 \leq i \leq \log_2(T_{M'})} 1 \\ &\leq SA(\log_2(T_{M'}) + 1) \\ &\leq O(SA \log_2(T_{M'})). \end{aligned} \tag{14}$$

By Cauchy-Schwarz inequality,

$$\begin{aligned} \sum_{m=1}^{M'} \sum_{h=1}^{H^m} \sqrt{\frac{w_h^m}{n^m(s_h^m, a_h^m)}} &\leq \sqrt{\left( \sum_{m=1}^{M'} \sum_{h=1}^{H^m} w_h^m \right) \left( \sum_{m=1}^{M'} \sum_{h=1}^{H^m} \frac{1}{n^m(s_h^m, a_h^m)} \right)} \\ &\leq O \left( \sqrt{SA \log_2(T_{M'}) \sum_{m=1}^{M'} \sum_{h=1}^{H^m} w_h^m} \right). \end{aligned}$$

□

By setting successively  $w_h^m = \mathbb{V}(P_{s_h^m, a_h^m}, V^m)$ ,  $\mathbb{V}(P_{s_h^m, a_h^m}, V^* - V^m)$  and  $\widehat{c}(s_h^m, a_h^m)$ , and relaxing  $\iota_{s_h^m, a_h^m}$  to its upper-bound  $\iota_{M'} = \ln\left(\frac{12SAS'T_{M'}^2}{\delta}\right)$  we have

$$\begin{aligned} X_2(M') &\leq O \left( \sqrt{SA \log_2(T_{M'}) \iota_{M'} \underbrace{\sum_{m=1}^{M'} \sum_{h=1}^{H^m} \mathbb{V}(P_{s_h^m, a_h^m}, V^m)}_{:=X_4(M')}} \right) \\ &\quad + \sqrt{S^2 A \log_2(T_{M'}) \iota_{M'} \underbrace{\sum_{m=1}^{M'} \sum_{h=1}^{H^m} \mathbb{V}(P_{s_h^m, a_h^m}, V^* - V^m)}_{:=X_5(M')}} \\ &\quad + \sqrt{SA \log_2(T_{M'}) \iota_{M'} \sum_{m=1}^{M'} \sum_{h=1}^{H^m} \widehat{c}(s_h^m, a_h^m) + B_* S^2 A \log_2(T_{M'})} \\ &\quad + BS^{3/2} A \log_2(T_{M'}) \iota_{M'} + \sum_{m=1}^{M'} \sum_{h=1}^{H^m} (1 + c_1 \sqrt{\iota_{M'}/2}) \epsilon_{V1}^m \Big). \end{aligned}$$

### ③ Third, bound each summation separately.

**Regret contribution of the estimated costs.** From line 15 in EB-SSP, we have that  $\widehat{c}(s, a) \leq \frac{2\theta(s, a)}{N(s, a)}$ . Let  $\theta^m(s, a)$  denote the value of  $\theta(s, a)$  for calculating  $\widehat{c}^m$ . By definition,

$$\begin{aligned} \theta^m(s_h^m, a_h^m) &= \sum_{m'=1}^{M'} \sum_{h'=1}^{H^{m'}} \mathbb{I}[(s_h^m, a_h^m) = (s_{h'}^{m'}, a_{h'}^{m'})] c_{h'}^{m'} \\ &\quad - \mathbb{I}[\text{first occurrence of } (m', h') \text{ such that } (s_h^m, a_h^m) = (s_{h'}^{m'}, a_{h'}^{m'})] c_{h'}^{m'} \\ &\quad + \mathbb{I}[\text{first occurrence of } (m', h') \text{ such that } (s_h^m, a_h^m) = (s_{h'}^{m'}, a_{h'}^{m'})] c_{h'}^{m'} \\ &\leq \sum_{m'=1}^{M'} \sum_{h'=1}^{H^{m'}} \mathbb{I}[(s_h^m, a_h^m) = (s_{h'}^{m'}, a_{h'}^{m'})] c_{h'}^{m'} + 1. \end{aligned}$$

For any  $M' \leq M$  we have

$$\begin{aligned} &\sum_{m=1}^{M'} \sum_{h=1}^{H^m} \widehat{c}^m(s_h^m, a_h^m) \\ &\leq \sum_{m=1}^{M'} \sum_{h=1}^{H^m} \frac{2\theta^m(s_h^m, a_h^m)}{n^m(s_h^m, a_h^m)} \\ &= \sum_{m=1}^{M'} \sum_{h=1}^{H^m} \sum_{m'=1}^{M'} \sum_{h'=1}^{H^{m'}} \mathbb{I}[(s_h^m, a_h^m) = (s_{h'}^{m'}, a_{h'}^{m'})] \frac{2c_{h'}^{m'}}{n^m(s_h^m, a_h^m)} \end{aligned}$$

$$\begin{aligned}
& + \sum_{m=1}^{M'} \sum_{h=1}^{H^m} \frac{2}{n^m(s_h^m, a_h^m)} \\
\stackrel{(i)}{\leq} & \sum_{m'=1}^{M'} \sum_{h'=1}^{H^{m'}} \frac{c_{h'}^{m'}}{n^{m'}(s_{h'}^{m'}, a_{h'}^{m'})} \cdot \sum_{m=1}^{M'} \sum_{h=1}^{H^m} \mathbb{I}[(s_h^m, a_h^m) = (s_{h'}^{m'}, a_{h'}^{m'}), n^m(s_h^m, a_h^m) = 2n^{m'}(s_{h'}^{m'}, a_{h'}^{m'})] \\
& + 2SA(\log_2(T_{M'}) + 1) \\
\leq & 2SA(\log_2(T_{M'}) + 1) + \sum_{m'=1}^{M'} \sum_{h'=1}^{H^{m'}} \frac{c_{h'}^{m'}}{n^{m'}(s_{h'}^{m'}, a_{h'}^{m'})} \cdot 2n^{m'}(s_{h'}^{m'}, a_{h'}^{m'}) \\
= & 2SA(\log_2(T_{M'}) + 1) + 2 \sum_{m'=1}^{M'} \sum_{h'=1}^{H^{m'}} c_{h'}^{m'} \\
= & 2SA(\log_2(T_{M'}) + 1) + 2C_{M'},
\end{aligned}$$

where (i) comes from Eq. 14.

**Regret contribution of the VISGO precision errors.** For any  $M' \leq M$ , denote by  $J_{M'}$  the (unknown) total number of triggers in the first  $M'$  intervals. For  $1 \leq j \leq J_{M'}$ , denote by  $L_j$  the number of time steps elapsed between the  $(j-1)$ -th and the  $j$ -th trigger. The doubling condition implies that  $L_j \leq 2^j SA$  and that there are at most  $J_{M'} = O(SA \log_2(T_{M'}/(SA)))$  triggers. Using that Alg. 1 selects as error  $\epsilon_{V1}^j = 2^{-j}/(SA)$ , we have that

$$\begin{aligned}
\sum_{m=1}^{M'} \sum_{h=1}^{H^m} (1 + c_1 \sqrt{\iota_{M'}/2}) \epsilon_{V1}^m & \leq (1 + c_1 \sqrt{\iota_{M'}/2}) \sum_{j=1}^{J_{M'}} L_j \epsilon_{V1}^j \\
& \leq (1 + c_1 \sqrt{\iota_{M'}/2}) J_{M'} \\
& = O(SA \log_2(T_{M'}) \sqrt{\iota_{M'}}).
\end{aligned}$$

**Lemma 24.** *Conditioned on Lem. 20, for a fixed  $M' \leq M$  with probability  $1 - 2\delta$ ,*

$$X_4(M') \leq O(B_\star(C_{M'} + X_2(M'))) + (B_\star^2 SA + B_\star)(\log_2(T_{M'}) + \ln(2/\delta)).$$

*Proof.* We introduce the normalized value function  $\bar{V}^m := V^m/B_\star \in [0, 1]$ . Define

$$F(d) := \sum_{m=1}^{M'} \sum_{h=1}^{H^m} (P_{s_h^m, a_h^m}(\bar{V}^m)^{2^d} - (\bar{V}^m(s_{h+1}^m))^{2^d}), \quad G(d) := \sum_{m=1}^{M'} \sum_{h=1}^{H^m} \mathbb{V}(P_{s_h^m, a_h^m}, (\bar{V}^m)^{2^d}).$$

Then  $X_4(M') = B_\star^2 G(0)$ . Direct computation gives that

$$\begin{aligned}
G(d) & = \sum_{m=1}^{M'} \sum_{h=1}^{H^m} (P_{s_h^m, a_h^m}(\bar{V}^m)^{2^{d+1}} - (P_{s_h^m, a_h^m}(\bar{V}^m)^{2^d})^2) \\
& \stackrel{(i)}{\leq} \underbrace{\sum_{m=1}^{M'} \sum_{h=1}^{H^m} (P_{s_h^m, a_h^m}(\bar{V}^m)^{2^{d+1}} - (\bar{V}^m(s_{h+1}^m))^{2^{d+1}})}_{\leq M'_1} + \underbrace{\sum_{m=1}^{M'} (\bar{V}^m(s_{H^m+1}^m))^{2^{d+1}}}_{\leq 0} \\
& \quad + \underbrace{\sum_{m=1}^{M'} \sum_{h=1}^{H^m} ((\bar{V}^m(s_h^m))^{2^{d+1}} - (P_{s_h^m, a_h^m} \bar{V}^m)^{2^{d+1}})}_{\leq 0} - \underbrace{\sum_{m=1}^{M'} (\bar{V}^m(s_1^m))^{2^{d+1}}}_{\leq 0} \\
& \stackrel{(ii)}{\leq} F(d+1) + M'_1 + 2^{d+1} \sum_{m=1}^{M'} \sum_{h=1}^{H^m} \max\{\bar{V}^m(s_h^m) - P_{s_h^m, a_h^m} \bar{V}^m, 0\}
\end{aligned}$$

$$\begin{aligned}
&= F(d+1) + M'_1 + \frac{2^{d+1}}{B_\star} \sum_{m=1}^{M'} \sum_{h=1}^{H^m} \max\{Q^m(s_h^m, a_h^m) - P_{s_h^m, a_h^m} V^m, 0\} \\
&\stackrel{\text{(iii)}}{\leq} F(d+1) + M'_1 + \frac{2^{d+1}}{B_\star} \sum_{m=1}^{M'} \sum_{h=1}^{H^m} (c(s_h^m, a_h^m) + \beta^m(s_h^m, a_h^m)) \\
&= F(d+1) + M'_1 + \frac{2^{d+1}}{B_\star} \sum_{m=1}^{M'} \sum_{h=1}^{H^m} (c_h^m + \beta^m(s_h^m, a_h^m) + (c(s_h^m, a_h^m) - c_h^m)) \\
&\leq F(d+1) + M'_1 + \frac{2^{d+1}}{B_\star} (C_{M'} + X_2(M') + |X_3(M')|),
\end{aligned}$$

where  $M'_1$  denotes the number of intervals satisfying  $\bar{V}^m(s_{H^{m+1}}^m) \neq 0$ ; (i) is by convexity of  $f(x) = x^{2^d}$ ; (ii) is by Lem. 34; (iii) is by Lem. 20.

For a fixed  $d$ ,  $F(d)$  is a martingale. By taking  $c = 1$  in Lem. 30, we have

$$\mathbb{P}\left[F(d) > 2\sqrt{2G(d)(\log_2(T_{M'}) + \ln(2/\delta))} + 5(\log_2(T_{M'}) + \ln(2/\delta))\right] \leq \delta.$$

Taking  $\delta' = \delta/(\log_2(T_{M'}) + 1)$ , using  $x \geq \ln(x) + 1$  and finally swapping  $\delta$  and  $\delta'$ , we have that

$$\mathbb{P}\left[F(d) > 2\sqrt{2G(d)(2\log_2(T_{M'}) + \ln(2/\delta))} + 5(2\log_2(T_{M'}) + \ln(2/\delta))\right] \leq \frac{\delta}{\log_2(T_{M'}) + 1}.$$

Taking a union bound over  $d = 1, 2, \dots, \log_2(T_{M'})$ , we have that with probability  $1 - \delta$ ,

$$\begin{aligned}
F(d) &\stackrel{\text{(i)}}{\leq} 2\sqrt{2(2\log_2(T_{M'}) + \ln(2/\delta))} \cdot \sqrt{F(d+1) + 2^{d+1} \cdot \frac{C_{M'} + X_2(M') + |X_3(M')|}{B_\star}} \\
&\quad + 5(2\log_2(T_M) + \ln(2/\delta)) + 2\sqrt{2(2\log_2(T_{M'}) + \ln(2/\delta))} M'_1.
\end{aligned}$$

From Lem. 32, taking  $\lambda_1 = T_{M'}$ ,  $\lambda_2 = 2\sqrt{2(2\log_2(T_{M'}) + \ln(2/\delta))}$ ,  $\lambda_3 = (C_{M'} + X_2(M') + |X_3(M')|)/B_\star$ ,  $\lambda_4 = 5(2\log_2(T_M) + \ln(2/\delta)) + 2\sqrt{2(2\log_2(T_{M'}) + \ln(2/\delta))} M'_1$ , we have that

$$F(1) \leq O\left(\log_2(T_{M'}) + \ln(2/\delta) + \frac{C_{M'} + X_2(M') + |X_3(M')|}{B_\star} + M'_1\right).$$

Hence

$$X_4(M') \leq O(B_\star(C_{M'} + X_2(M') + |X_3(M')|) + B_\star^2(\log_2(T_{M'}) + \ln(2/\delta) + M'_1)).$$

By definition,  $M'_1 \leq O(SA \log_2(T_{M'}))$  since only those intervals ending by triggering the doubling condition are taken into account. From the bound of  $|X_3(M')|$ , the following holds with probability  $1 - 2\delta$ :

$$X_4(M') \leq O(B_\star(C_{M'} + X_2(M')) + (B_\star^2 SA + B_\star)(\log_2(T_{M'}) + \ln(2/\delta))).$$

Throughout the proof, the inequality  $O(\sqrt{xy}) \leq O(x + y)$  is utilized to simplify the bound.  $\square$

**Lemma 25.** *Conditioned on Lem. 20, for a fixed  $M' \leq M$  with probability  $1 - \delta$ ,*

$$X_5(M') \leq O(B_\star^2 SA(\log_2(T_{M'}) + \ln(2/\delta)) + B_\star X_2(M')).$$

*Proof.* We introduce the normalized quantity  $\widetilde{V}^m := \widetilde{V}^m/B_\star \in [-1, 1]$  (recall the definition in Lem. 21). Define

$$\widetilde{F}(d) := \sum_{m=1}^{M'} \sum_{h=1}^{H^m} (P_{s_h^m, a_h^m} (\widetilde{V}^m)^{2^d} - (\widetilde{V}^m(s_{h+1}^m))^{2^d}), \quad \widetilde{G}(d) := \sum_{m=1}^{M'} \sum_{h=1}^{H^m} \mathbb{V}(P_{s_h^m, a_h^m}, (\widetilde{V}^m)^{2^d}).$$

Then  $X_5(M') = \widetilde{G}(0)B_\star^2$ . Direct computation gives that

$$\widetilde{G}(d) = \sum_{m=1}^{M'} \sum_{h=1}^{H^m} \left( P_{s_h^m, a_h^m} (\widetilde{V}^m)^{2^{d+1}} - (P_{s_h^m, a_h^m} (\widetilde{V}^m)^{2^d})^2 \right)$$

$$\begin{aligned}
&\leq \sum_{m=1}^{M'} \sum_{h=1}^{H^m} \left( P_{s_h^m, a_h^m}(\tilde{V}^m)^{2^{d+1}} - (\tilde{V}^m(s_{h+1}^m))^{2^{d+1}} \right) + \underbrace{\sum_{m=1}^{M'} (\tilde{V}^m(s_{H^m+1}^m))^{2^{d+1}}}_{\leq \tilde{M}'_1} \\
&\quad + \underbrace{\sum_{m=1}^{M'} \sum_{h=1}^{H^m} \left( (\tilde{V}^m(s_h^m))^{2^{d+1}} - (P_{s_h^m, a_h^m} \tilde{V}^m)^{2^{d+1}} \right)}_{\leq 0} - \sum_{m=1}^{M'} (\tilde{V}^m(s_1^m))^{2^{d+1}} \\
&\leq \tilde{F}(d+1) + \tilde{M}'_1 + 2^{d+1} \sum_{m=1}^{M'} \sum_{h=1}^{H^m} \max\{\tilde{V}^m(s_h^m) - P_{s_h^m, a_h^m} \tilde{V}^m, 0\} \\
&= \tilde{F}(d+1) + \tilde{M}'_1 + \frac{2^{d+1}}{B_\star} \sum_{m=1}^{M'} \sum_{h=1}^{H^m} \max\{\tilde{V}^m(s_h^m) - P_{s_h^m, a_h^m} \tilde{V}^m, 0\} \\
&\stackrel{(i)}{\leq} \tilde{F}(d+1) + \tilde{M}'_1 + \frac{2^{d+1}}{B_\star} \sum_{m=1}^{M'} \sum_{h=1}^{H^m} \beta^m(s_h^m, a_h^m) \\
&= \tilde{F}(d+1) + \tilde{M}'_1 + \frac{2^{d+1}}{B_\star} X_2(M'),
\end{aligned}$$

where  $\tilde{M}'_1$  denotes the number of intervals satisfying  $\tilde{V}^m(s_{H^m+1}^m) \neq 0$ ; (i) come from Lem. 21.

For a fixed  $d$ ,  $\tilde{F}(d)$  is a martingale. By taking  $c = 1$  in Lem. 30, we have

$$\mathbb{P}\left[\tilde{F}(d) > 2\sqrt{2\tilde{G}(d)(\log_2(T_{M'}) + \ln(2/\delta))} + 5(\log_2(T_{M'}) + \ln(2/\delta))\right] \leq \delta.$$

Taking  $\delta' = \delta/(\log_2(T_{M'}) + 1)$ , using  $x \geq \ln(x) + 1$  and finally swapping  $\delta$  and  $\delta'$ , we have that

$$\mathbb{P}\left[\tilde{F}(d) > 2\sqrt{2\tilde{G}(d)(2\log_2(T_{M'}) + \ln(2/\delta))} + 5(2\log_2(T_{M'}) + \ln(2/\delta))\right] \leq \frac{\delta}{\log_2(T_{M'}) + 1}.$$

Taking a union bound over  $d = 1, 2, \dots, \log_2(T_{M'})$ , we have that with probability  $1 - \delta$ ,

$$\begin{aligned}
\tilde{F}(d) &\leq 2\sqrt{2(2\log_2(T_{M'}) + \ln(2/\delta))} \cdot \sqrt{\tilde{F}(d+1) + 2^{d+1} \frac{X_2(M')}{B_\star}} \\
&\quad + 5(2\log_2(T_{M'}) + \ln(2/\delta)) + 2\sqrt{2(2\log_2(T_{M'}) + \ln(2/\delta))} \tilde{M}'_1.
\end{aligned}$$

From Lem. 32, taking  $\lambda_1 = T_{M'}$ ,  $\lambda_2 = 2\sqrt{2(2\log_2(T_{M'}) + \ln(2/\delta))}$ ,  $\lambda_3 = X_2(M')/B_\star$ ,  $\lambda_4 = 5(2\log_2(T_{M'}) + \ln(2/\delta)) + 2\sqrt{2(2\log_2(T_{M'}) + \ln(2/\delta))} \tilde{M}'_1$ , we have that

$$\tilde{F}(1) \leq O\left(\log_2(T_{M'}) + \ln(2/\delta) + \frac{X_2(M')}{B_\star} + \tilde{M}'_1\right).$$

Since  $V^\star(g) - V^m(g) = 0 - 0 = 0$ , similar as bounding  $M'_1$ , we have  $\tilde{M}'_1 \leq O(SA \log_2(T_{M'}))$ . Hence with probability  $1 - \delta$ , we have

$$X_5(M') \leq O(B_\star^2 SA (\log_2(T_{M'}) + \ln(2/\delta)) + B_\star X_2(M')).$$

Throughout the proof, the inequality  $O(\sqrt{xy}) \leq O(x + y)$  is utilized to simplify the bound.  $\square$

#### ④ Finally, bind them together.

Let  $\bar{t}_{M'} := \ln\left(\frac{12SAS'T_{M'}}{\delta}\right) + \log_2((\max\{B_\star, 1\})^2 T_{M'}) + \ln\left(\frac{2}{\delta}\right)$  be the upper bound of all previous log terms.

$$X_2(M') \leq O\left(\sqrt{SAX_4(M')\bar{t}_{M'}} + \sqrt{S^2AX_5(M')\bar{t}_{M'}}\right)$$



$$\begin{aligned}
& + SA\bar{l}_{M'}^{3/2} + \sqrt{SAC_{M'}\bar{l}_{M'}} + B_*S^2A\bar{l}_{M'}^2 + BS^{3/2}A\bar{l}_{M'}^2), \\
X_4(M') & \leq O(B_*(C_{M'} + X_2(M')) + (B_*^2SA + B_*)\bar{l}_{M'}), \\
X_5(M') & \leq O(B_*^2SA\bar{l}_{M'} + B_*X_2(M')).
\end{aligned}$$

This implies that

$$\begin{aligned}
X_2(M') & \stackrel{(i)}{\leq} O\left(\sqrt{B_*S^2A\bar{l}_{M'}} \cdot \sqrt{X_2(M')} + (\sqrt{B_*} + 1)\sqrt{SAC_{M'}\bar{l}_{M'}} + BS^2A\bar{l}_{M'}^2\right) \\
& \leq O\left(\max\left\{\sqrt{B_*S^2A\bar{l}_{M'}} \cdot \sqrt{X_2(M')}, (\sqrt{B_*} + 1)\sqrt{SAC_{M'}\bar{l}_{M'}} + BS^2A\bar{l}_{M'}^2\right\}\right),
\end{aligned}$$

where (i) uses the assumption  $B \geq \max\{B_*, 1\}$  to simplify the bound. Considering terms in  $\max\{\}$  separately, we obtain two bounds:

$$\begin{aligned}
X_2(M') & \leq O(B_*S^2A\bar{l}_{M'}^2), \\
X_2(M') & \leq O((\sqrt{B_*} + 1)\sqrt{SAC_{M'}\bar{l}_{M'}} + BS^2A\bar{l}_{M'}^2).
\end{aligned}$$

By taking the maximum of these bounds, we have

$$X_2(M') \leq O((\sqrt{B_*} + 1)\sqrt{SAC_{M'}\bar{l}_{M'}} + BS^2A\bar{l}_{M'}^2).$$

## F Technical Lemmas

**Lemma 26** (Bennett's Inequality, anytime version). *Let  $Z, Z_1, \dots, Z_n$  be i.i.d. random variables with values in  $[0, b]$  and let  $\delta > 0$ . Define  $\mathbb{V}[Z] = \mathbb{E}[(Z - \mathbb{E}[Z])^2]$ . Then we have*

$$\mathbb{P}\left[\forall n \geq 1, \left|\mathbb{E}[Z] - \frac{1}{n} \sum_{i=1}^n Z_i\right| > \sqrt{\frac{2\mathbb{V}[Z] \ln(4n^2/\delta)}{n}} + \frac{b \ln(4n^2/\delta)}{n}\right] \leq \delta.$$

*Proof.* From Bennett's inequality, if the variables have values in  $[0, 1]$ , then for a specific  $n \geq 1$ ,

$$\mathbb{P}\left[\left|\mathbb{E}[Z] - \frac{1}{n} \sum_{i=1}^n Z_i\right| > \sqrt{\frac{2\mathbb{V}[Z] \ln(2/\delta)}{n}} + \frac{\ln(2/\delta)}{n}\right] \leq \delta.$$

We then choose  $\delta \leftarrow \frac{\delta}{2n^2}$  and take a union bound over all possible values of  $n \geq 1$ , and the result follows given that  $\sum_{n \geq 1} \frac{\delta}{2n^2} < \delta$ . To account for the case  $b \neq 1$  we apply the result to  $(Z_n/b)$ .  $\square$

**Lemma 27** (Theorem 4 in [Maurer and Pontil \[2009\]](#), anytime version). *Let  $Z, Z_1, \dots, Z_n$  ( $n \geq 2$ ) be i.i.d. random variables with values in  $[0, b]$  and let  $\delta > 0$ . Define  $\bar{Z} = \frac{1}{n} \sum_{i=1}^n Z_i$  and  $\hat{V}_n = \frac{1}{n} \sum_{i=1}^n (Z_i - \bar{Z})^2$ . Then we have*

$$\mathbb{P}\left[\forall n \geq 1, \left|\mathbb{E}[Z] - \frac{1}{n} \sum_{i=1}^n Z_i\right| > \sqrt{\frac{2\hat{V}_n \ln(4n^2/\delta)}{n-1}} + \frac{7b \ln(4n^2/\delta)}{3(n-1)}\right] \leq \delta.$$

**Lemma 28** (Popoviciu's Inequality). *Let  $X$  be a random variable whose value is in a fixed interval  $[a, b]$ , then  $\mathbb{V}[X] \leq \frac{1}{4}(b-a)^2$ .*

**Lemma 29** (Lemma 11 in [Zhang et al. \[2021c\]](#)). *Let  $(M_n)_{n \geq 0}$  be a martingale such that  $M_0 = 0$  and  $|M_n - M_{n-1}| \leq c$  for some  $c > 0$  and any  $n \geq 1$ . Let  $\text{Var}_n = \sum_{k=1}^n \mathbb{E}[(M_k - M_{k-1})^2 | \mathcal{F}_{k-1}]$  for  $n \geq 0$ , where  $\mathcal{F}_k = \sigma(M_1, \dots, M_k)$ . Then for any positive integer  $n$  and any  $\epsilon, \delta > 0$ , we have that*

$$\mathbb{P}\left[|M_n| \geq 2\sqrt{2\text{Var}_n \ln(1/\delta)} + 2\sqrt{\epsilon \ln(1/\delta)} + 2c \ln(1/\delta)\right] \leq 2\left(\log_2\left(\frac{nc^2}{\epsilon}\right) + 1\right)\delta.$$

**Lemma 30.** *Let  $(M_n)_{n \geq 0}$  be a martingale such that  $M_0 = 0$  and  $|M_n - M_{n-1}| \leq c$  for some  $c > 0$  and any  $n \geq 1$ . Let  $\text{Var}_n = \sum_{k=1}^n \mathbb{E}[(M_k - M_{k-1})^2 | \mathcal{F}_{k-1}]$  for  $n \geq 0$ , where  $\mathcal{F}_k = \sigma(M_1, \dots, M_k)$ . Then for any positive integer  $n$  and  $\delta \in (0, 2(nc^2)^{1/\ln 2}]$ , we have that*

$$\mathbb{P}\left[|M_n| \geq 2\sqrt{2\text{Var}_n(\log_2(nc^2) + \ln(2/\delta))} + 2\sqrt{\log_2(nc^2) + \ln(2/\delta)} + 2c(\log_2(nc^2) + \ln(2/\delta))\right] \leq \delta.$$

*Proof.* Take  $\epsilon = 1$  and  $\delta' = 2(\log_2(nc^2) + 1)\delta$  in Lem. 29. By  $x \geq \ln(x) + 1$ , we have

$$\ln(1/\delta) = \ln(2(\log_2(nc^2) + 1)/\delta') = \ln(\log_2(nc^2) + 1) + \ln(2/\delta') \leq \log_2(nc^2) + \ln(2/\delta').$$

Hence,

$$\begin{aligned} \mathbb{P}\left[|M_n| \geq 2\sqrt{2\text{Var}_n(\log_2(nc^2) + \ln(2/\delta'))} + 2\sqrt{\log_2(nc^2) + \ln(2/\delta')} + 2c(\log_2(nc^2) + \ln(2/\delta'))\right] \\ \leq \mathbb{P}\left[|M_n| \geq 2\sqrt{2\text{Var}_n \ln(1/\delta)} + 2\sqrt{\ln(1/\delta)} + 2c \ln(1/\delta)\right] \\ \leq \delta'. \end{aligned}$$

By swapping  $\delta$  and  $\delta'$  we complete the proof.  $\square$

**Lemma 31** (Lemma 11 in Zhang et al. [2021a]). *Let  $\lambda_1, \lambda_2, \lambda_4 \geq 0$ ,  $\lambda_3 \geq 1$  and  $i' = \log_2 \lambda_1$ . Let  $a_1, a_2, \dots, a_{i'}$  be non-negative reals such that  $a_i \leq \lambda_1$  and  $a_i \leq \lambda_2 \sqrt{a_{i+1} + 2^{i+1} \lambda_3} + \lambda_4$  for any  $1 \leq i \leq i'$ . Then we have that  $a_1 \leq \max\{(\lambda_2 + \sqrt{\lambda_2^2 + \lambda_4})^2, \lambda_2 \sqrt{8\lambda_3} + \lambda_4\}$ .*

**Lemma 32.** *Let  $\lambda_1, \lambda_2, \lambda_4 \geq 0$ ,  $\lambda_3 \geq 1$  and  $i' = \log_2 \lambda_1$ . Let  $a_1, a_2, \dots, a_{i'}$  be non-negative reals such that  $a_i \leq \lambda_1$  and  $a_i \leq \lambda_2 \sqrt{a_{i+1} + 2^{i+1} \lambda_3} + \lambda_4$  for any  $1 \leq i \leq i'$ . Then we have that  $a_1 \leq O(\lambda_2^2 + \lambda_3 + \lambda_4)$ .*

*Proof.* Since  $\max\{a, b\} \leq a + b$  and  $2ab \leq a^2 + b^2$  for any choice of non-negative  $a$  and  $b$ , we can transform the result of Lem. 31 into

$$\begin{aligned} a_1 &\leq \max\left\{\left(\lambda_2 + \sqrt{\lambda_2^2 + \lambda_4}\right)^2, \lambda_2 \sqrt{8\lambda_3} + \lambda_4\right\} \\ &\leq O\left(\left(\lambda_2 + \sqrt{\lambda_2^2 + \lambda_4}\right)^2 + \lambda_2 \sqrt{8\lambda_3} + \lambda_4\right) \\ &\leq O(\lambda_2^2 + \lambda_2^2 + \lambda_4 + \lambda_2^2 + \lambda_3 + \lambda_4) \\ &\leq O(\lambda_2^2 + \lambda_3 + \lambda_4). \end{aligned}$$

$\square$

**Lemma 33.** *For random variable  $Z \in [0, 1]$ ,  $\mathbb{V}[Z] \leq \mathbb{E}[Z]$ .*

*Proof.*  $\mathbb{V}[Z] = \mathbb{E}[Z^2] - (\mathbb{E}[Z])^2 \leq \mathbb{E}[Z^2] \leq \mathbb{E}[Z]$ .  $\square$

**Lemma 34.** *For any  $a, b \in [0, 1]$  and  $k \in \mathbb{N}$ ,  $a^k - b^k \leq k \max\{a - b, 0\}$ .*

*Proof.*  $a^k - b^k = (a - b) \sum_{i=0}^{k-1} a^i b^{k-1-i} \leq \max\{a - b, 0\} \cdot \sum_{i=0}^{k-1} 1 = k \max\{a - b, 0\}$ .  $\square$

**Lemma 35.** *For  $a, b, x \geq 0$ ,  $x \leq a\sqrt{x} + b$  implies  $x \leq (a + \sqrt{b})^2$ .*

*Proof.*  $x \leq a\sqrt{x} + b \Rightarrow x \leq \left(\frac{a + \sqrt{a^2 + b}}{2}\right)^2 \leq (a + \sqrt{b})^2$ .  $\square$

## G Computational Complexity of EB-SSP

Here we complement Remarks 1 and 3 on the computational complexity of EB-SSP (Alg. 1).

The computational complexity of a VISGO procedure can be bounded as  $O(\frac{S^2 A}{1-\rho} \log(B_\star/\epsilon_{\text{VI}}))$  (assuming for simplicity that  $B_\star \geq 1$ , otherwise replace  $\max\{B_\star, 1\} \leftarrow B_\star$ ). By the fact that total number of VISGO procedure is bounded by  $O(SA \log T)$ , we derive  $\log(B_\star/\epsilon_{\text{VI}}) = O(SA \log(B_\star T))$  by choice of  $\epsilon_{\text{VI}}$ . As a result, the total computational complexity for EB-SSP is  $O(TS^2 A \cdot SA \log(B_\star T) \cdot SA \log T)$ , which is polynomially bounded and in particular near-linear in  $T$ . Also note that  $T$  is bounded polynomially w.r.t.  $K$  as shown in the various cases of Sect. 4.1. Indeed, in the case of positive costs lower bounded by  $c_{\min} > 0$ , Cor. 5 entails that  $T \leq c_{\min}^{-1} KV^\star(s_0) + c_{\min}^{-1} \tilde{O}(B_\star \sqrt{SAK} + B_\star S^2 A)$ . In the general cost case, the cost perturbation

trick is applied and the minimum cost becomes  $K^{-n}$  for Cor. 6 or  $(\bar{T}_*K)^{-1}$  for Cor. 8, i.e.,  $c_{\min}^{-1}$  depends polynomially on  $K$ .

We note that the analysis of the computational complexity of EB-SSP may likely be refined. Indeed, we see that i) on the one hand, if  $n(s, a)$  is small, then the optimistic skewing of  $\tilde{P}_{s,a}$  is not too small so the probability of reaching the goal from  $(s, a)$  is not too small (so the associated contraction modulus is bounded away from 1) and ii) on the other hand, if  $n(s, a) \rightarrow +\infty$ , then  $\tilde{P}_{s,a} \rightarrow \hat{P}_{s,a} \rightarrow P_{s,a}$ , so to the limit we should recover the convergence properties of VI of the optimal Bellman operator under the true model, which by assumption admits a proper policy in  $P$ . Thus we see that studying further the “intermediate regime” may bring into the picture the computational complexity of running VI in the true model, yet this is not our main focus here, as our complexity analysis is sufficient to ensure the computational efficiency of EB-SSP.

## H Unknown $B_*$ : Parameter-Free EB-SSP

In this section, we relax the assumption that (an upper bound of)  $B_*$  is known to EB-SSP. In Alg. 2 we propose a parameter-free EB-SSP that bypasses the requirement  $B \geq B_*$  (line 2 of Alg. 1) to tune the exploration bonus. As in Sect. 4 we consider for ease of exposition that  $B_* \geq 1$ . We structure the section as follows: App. H.1 presents our algorithm and provides intuition, App. H.2 spells out its regret guarantee, and App. H.3 gives its proof.

### H.1 Algorithm and Intuition

Parameter-free EB-SSP (Alg. 2) initializes an estimate  $\tilde{B} = 1$  and decomposes the time steps into *phases*, indexed by  $\phi$ . The execution of a phase is reported in the subroutine PHASE (Alg. 3). Given any estimate  $\tilde{B}$ , a subroutine PHASE has the same structure as Alg. 1, up to two key differences:

- **Halting due to exceeding cumulative cost.** PHASE tracks the cumulative cost within the current phase, and terminates whenever it exceeds a threshold  $C_{\text{bound}}$  (Eq. 17) that depends on  $\tilde{B}$ ,  $S$ ,  $A$ ,  $\delta$  and the current episode and time indexes  $k$  and  $t$ , which are all computable quantities to the agent.
- **Halting due to exceeding VISGO range.** During each VISGO procedure, PHASE tracks the range of the value function  $V^{(i)}$  at each VISGO iteration  $i$ , and terminates if  $\|V^{(i)}\|_{\infty} > \tilde{B}$ .

The estimate  $\tilde{B}$  can be incremented in two different ways and speeds:

- **Doubling increment of  $\tilde{B}$ .** On the one hand, whenever a phase ends (i.e., one of the two halting conditions above is met),  $\tilde{B}$  is doubled ( $\tilde{B} \leftarrow 2\tilde{B}$ ).
- **Episode-driven increment of  $\tilde{B}$ .** On the other hand, at the beginning of each new episode  $k$ , the estimate is automatically increased to  $\tilde{B} \leftarrow \max\{\tilde{B}, \sqrt{k}/(S^{3/2}A^{1/2})\}$ .

We now explain the rationale behind our scheme:

- **Reason for episode-driven increment of  $\tilde{B}$ .** The fact that  $\tilde{B}$  grows as a function of  $k$  implies that at some (unknown) point it will hold that  $\tilde{B} \geq B_*$  for large enough  $k$ . This will enable us to recover the analysis and the regret bound of Thm. 3.
- **Reason for doubling increment of  $\tilde{B}$ .** The doubling increment comes into play whenever a phase terminates due to an exceeding cumulative cost or VISGO range. At this point, the agent becomes aware that  $\tilde{B}$  is too small and thus it doubles it. It is crucial to allow intra-episode increments of  $\tilde{B}$  to avoid getting *stuck* in an episode with an underestimate  $\tilde{B} < B_*$ .
- **Reason for cumulative cost halting.** The cost threshold  $C_{\text{bound}}$  is designed so that (w.h.p.) it can be exceeded at most once in the case of  $\tilde{B} \geq B_*$ , and so that it can serve as a tight enough bound on the regret in the case of  $\tilde{B} < B_*$ .
- **Reason for VISGO range halting.** The threshold  $\tilde{B}$  on the range of the VISGO value functions is chosen so that (w.h.p.) it is never exceeded in the case of  $\tilde{B} \geq B_*$ , and so that it can serve as a guarantee of finite-time near-convergence of a VISGO procedure (i.e., the contraction property) in the case of  $\tilde{B} < B_*$ .

## H.2 Regret Guarantee of Parameter-Free EB-SSP

Parameter-free EB-SSP satisfies the following guarantee (which extends Thm. 3 to unknown  $B_*$ ).

**Restatement of Theorem 9.** Assume the conditions of Lem. 2 hold. Then with probability at least  $1 - \delta$  the regret of parameter-free EB-SSP (Alg. 2, App. H) can be bounded by

$$R_K = O\left(R_K^* \log\left(\frac{B_* SAT}{\delta}\right) + B_*^3 S^3 A \log^3\left(\frac{B_* SAT}{\delta}\right)\right),$$

where  $T$  is the cumulative time within the  $K$  episodes and  $R_K^*$  bounds the regret after  $K$  episodes of EB-SSP in the case of known  $B_*$  (i.e., the bound of Thm. 3 with  $B = B_*$ ).

As a result, parameter-free EB-SSP is able to circumvent the knowledge of  $B_*$  at the cost of only logarithmic and lower-order terms.

## H.3 Proof of Theorem 9

We begin by defining notations and concepts exclusively used in this section:

- $C_t$  denotes the cumulative cost up to time step  $t$  (included) that is accumulated in the execution of the subroutine PHASE in which time step  $t$  belongs. Importantly, note that the cumulative cost  $C_t$  is initialized to 0 at the beginning of each PHASE (line 5 of Alg. 3). Also note that re-planning (i.e., a VISGO procedure) occurs whenever the estimate  $\tilde{B}$  is changed.
- Denote by  $t_m$  the time step at the end of the current interval  $m$ , and by  $k_m$  the episode in which the time step  $t_m$  belongs.  $\tilde{B}_m$  denotes the value of  $\tilde{B}$  at time step  $t_m$ .  $C_m$  denotes  $C_{t_m}$ , i.e., the cumulative cost up to interval  $m$  (included) in the execution of the PHASE in which interval  $m$  belongs.

Unlike EB-SSP of Alg. 1, the parameter-free version has an increasing  $\tilde{B}$  throughout the process. To utilize the regret bounds (Thm. 3 and Eq. 13) in the case of  $\tilde{B} \geq B_*$ , slight modifications are needed to be applied to the algorithm and some lemmas.

**Modification to EB-SSP.** Previously, EB-SSP accepted a single value  $B \geq \max\{B_*, 1\}$  to compute the bonuses in Eq. 2. To satisfy the same regret bound when  $\tilde{B}$  changes, we require EB-SSP to accept a series of  $B_k$  for  $k \in \mathbb{N}^+$ , such that  $\max\{B_*, 1\} \leq B_k \leq B$  for any  $k$ . In any episode  $k$ , the analysis simply substitutes  $B_k$  for  $B$  in Eq. 2.

**Modifications to the proofs of Lem. 17, 18 and 20.** In the original version of the proofs, we proved the lemmas for any update of value functions, without mentioning any time relevant variables. Now since  $B$  relies on episode  $k$ , the modified proofs need to incorporate the changes. Suppose that we are examining  $Q(s, a)$ ,  $V(s)$ ,  $b(s, a)$  and  $\beta(s, a)$  for any state-action pair  $(s, a) \in \mathcal{S} \times \mathcal{A}$  in episode  $k$ . Lem. 17 and Lem. 18 utilize the property stated in Lem. 16, and the  $B$  in Lem. 16 is a parameter that is able to vary each time step we utilize Lem. 16. Thus, in the proofs of Lem. 17, 18 and 20, all the  $B$ 's are substituted with  $B_k$ 's to ensure that these lemmas are compatible with our modified setting.

**Modification to the proof of bounding  $\beta^m$  in App. E.3.** Suppose that interval  $m$  is in episode  $k$  and recall that  $B_k \leq B$ , then

$$\begin{aligned} b^m(s, a) &= \max\left\{c_1 \sqrt{\frac{\mathbb{V}(\tilde{P}_{s,a}, V^{(l)})_{\iota_{s,a}}}{n^m(s, a)}}, c_2 \frac{B_k \iota_{s,a}}{n^m(s, a)}\right\} + c_3 \sqrt{\frac{\hat{c}^m(s, a)_{\iota_{s,a}}}{n^m(s, a)}} + c_4 \frac{B_k \sqrt{S'_{\iota_{s,a}}}}{n^m(s, a)} \\ &\leq O\left(\sqrt{\frac{\mathbb{V}(\tilde{P}_{s,a}, V^{(l)})_{\iota_{s,a}}}{n^m(s, a)}} + \frac{B \iota_{s,a}}{n^m(s, a)} + \sqrt{\frac{\hat{c}^m(s, a)_{\iota_{s,a}}}{n^m(s, a)}} + \frac{B \sqrt{S'_{\iota_{s,a}}}}{n^m(s, a)}\right). \end{aligned}$$

Combining the above bound of  $b^m(s, a)$  with Lem. 20, we get that the bound of  $\beta^m$  in App. E.3 is unchanged.

Equipped with the slight modifications mentioned above, we now derive two key properties on which the analysis of parameter-free EB-SSP relies:

**Property 1: Optimism avoids the first halting condition.** Let us study any phase starting with estimate  $\tilde{B} \geq B_*$ . From Eq. 13 (which is the interval-generalization of Thm. 3), for a fixed initial

state  $s_0$  and a fixed interval  $m$ , the cumulative cost can be bounded with probability  $1 - \delta$  by

$$k_m V^*(s_0) + x \left( B_* \sqrt{SAk_m} \log_2 \left( \frac{B_* t_m SA}{\delta} \right) + \tilde{B}_m S^2 A \log_2^2 \left( \frac{B_* t_m SA}{\delta} \right) \right), \quad (15)$$

where  $x > 0$  is a large enough absolute constant (which can be retraced in the analysis leading to Eq. 13). By scaling  $\delta \leftarrow \delta / (2St_m^2)$  for each  $m \leq M$ , we have the following cumulative cost bound that holds for any initial state in  $\mathcal{S}$  and any interval  $m \leq M$ , with probability  $1 - \delta$ ,

$$\begin{aligned} C_m &\leq k_m V^*(s_0) + x \left( B_* \sqrt{SAk_m} \log_2 \left( \frac{B_* t_m SA \cdot 2St_m^2}{\delta} \right) + \tilde{B}_m S^2 A \log_2^2 \left( \frac{B_* t_m SA \cdot 2St_m^2}{\delta} \right) \right) \\ &\leq k_m B_* + 3x \left( B_* \sqrt{SAk_m} \log_2 \left( \frac{B_* t_m SA}{\delta} \right) + \tilde{B}_m S^2 A \log_2^2 \left( \frac{B_* t_m SA}{\delta} \right) \right). \end{aligned}$$

Since we are in the case of  $\tilde{B}_m \geq B_*$ , we have

$$C_m \leq k_m \tilde{B}_m + 3x \left( \tilde{B}_m \sqrt{SAk_m} \log_2 \left( \frac{\tilde{B}_m t_m SA}{\delta} \right) + \tilde{B}_m S^2 A \log_2^2 \left( \frac{\tilde{B}_m t_m SA}{\delta} \right) \right). \quad (16)$$

Since costs are non-negative, for any  $t \leq t_m$ , we have  $C_t \leq C_m$  hence  $C_t$  must also satisfy the bound of Eq. 16. There remains to predict the values of  $k_m$ ,  $t_m$ ,  $\tilde{B}_m$ , given the current  $k_{\text{cur}}$ ,  $t_{\text{cur}}$ ,  $\tilde{B}_{\text{cur}}$ . The upper bounds for  $k_m$  and  $\tilde{B}_m$  are  $k_{\text{cur}}$  and  $\tilde{B}_{\text{cur}}$  respectively, since they can only be incremented when reaching the goal  $g$ , which is a condition for ending the current interval. The upper bound for  $t_m$  can be derived using the pigeonhole principle: since  $t_{\text{cur}} = \sum_{(s,a) \in \mathcal{S} \times \mathcal{A}} n(s,a)$ , we know that  $2t_{\text{cur}} > \sum_{(s,a) \in \mathcal{S} \times \mathcal{A}} (2n(s,a) - 1)$ . Thus by time step  $2t_{\text{cur}}$  there must exist a trigger condition, which is a condition for ending the current interval. Hence, by replacing  $k_m \leftarrow k_{\text{cur}}$ ,  $\tilde{B}_m \leftarrow \tilde{B}_{\text{cur}}$  and  $t_m \leftarrow 2t_{\text{cur}}$  in Eq. 16, we get, with probability at least  $1 - \delta$ , that the cumulative cost within a phase that starts with  $\tilde{B} \geq B_*$  has the following anytime upper bound

$$C_{t_{\text{cur}}} \leq k_{\text{cur}} \tilde{B}_{\text{cur}} + 3x \left( \tilde{B}_{\text{cur}} \sqrt{SAk_{\text{cur}}} \log_2 \left( \frac{2\tilde{B}_{\text{cur}} t_{\text{cur}} SA}{\delta} \right) + \tilde{B}_{\text{cur}} S^2 A \log_2^2 \left( \frac{2\tilde{B}_{\text{cur}} t_{\text{cur}} SA}{\delta} \right) \right).$$

Note that this bound corresponds exactly to the cumulative cost threshold  $C_{\text{bound}}$  in Eq. 17. This means that with probability at least  $1 - \delta$ , the first halting condition cannot be met in a phase that starts with  $\tilde{B} \geq B_*$ .

**Property 2: Optimism avoids the second halting condition.** Let us consider the case of  $\tilde{B} \geq B_*$  whenever the algorithm re-plans (i.e., running VISGO procedure). The proof of Lem. 17 ensures that at any iteration,  $\|V^{(i)}\|_\infty \leq B_* \leq \tilde{B}$ , so the second halting condition is never met under the same high-probability event as above.

**Implications.** The two properties above indicate that, if a phase starts with estimate  $\tilde{B} \geq B_*$ , with probability at least  $1 - \delta$ , this phase will never halt due to the two halting conditions (it can only terminate if it completes the final episode  $K$ ), and Alg. 2 will thus never enter a new phase. Due to the doubling increment of  $\tilde{B}$  every time a phase ends, we can therefore bound the total number of phases as  $\Phi \leq \lceil \log_2(B_*) \rceil + 1$ .

**Analysis.** We now split the analysis of the regret contributions of the episodes in two *regimes*. To this end, let  $\kappa_* := \lceil B_*^2 S^3 A \rceil$  denote a special episode (note that it is unknown to the learner since it depends on  $B_*$ ). We consider that the high-probability event mentioned above holds (which is the case with probability at least  $1 - \delta$ ). Recall that at the beginning of each episode  $k$ , the algorithm sets  $\tilde{B} \leftarrow \max\{\tilde{B}, \sqrt{k}/(S^{3/2} A^{1/2})\}$ .

① **Regret contribution in the first regime (i.e., episodes  $k < \kappa_*$ ).**

We denote respectively by  $R_{1 \rightarrow \kappa_*}$  and  $C_{1 \rightarrow \kappa_*}$  the cumulative regret and the cumulative cost incurred by the algorithm before episode  $\kappa_*$  begins. For any phase  $\phi$ , we denote by

- $C_{1 \rightarrow \kappa_*}^{(\phi)}$  the cumulative cost incurred during the time steps that are *both* in phase  $\phi$  and in an episode  $k < \kappa_*$ ;

- $k^{(\phi)}$  the episode when phase  $\phi$  ends;
- $t^{(\phi)}$  the time step when phase  $\phi$  ends;
- $\tilde{B}^{(\phi)}$  the value of  $\tilde{B}$  at the end of phase  $\phi$ .

Observe that

$$C_{1 \rightarrow \kappa_*} = \sum_{\phi=1}^{\Phi} C_{1 \rightarrow \kappa_*}^{(\phi)}.$$

Now, by definition of  $\kappa_*$ , the episode-driven increment of  $\tilde{B}$  never exceeds  $B_*$ , unless  $\tilde{B}$  is already larger or equal to  $B_*$  at the beginning of the phase. But Property 1 ensures that if  $\tilde{B} \geq B_*$  in the beginning of a phase, then  $\tilde{B}$  will never be doubled afterwards. Hence, we are guaranteed that within the episodes  $k < \kappa_*$ , the final value of the estimate  $\tilde{B}$  is at most  $2B_*$ .

Since PHASE tracks the cumulative cost at each step using the threshold in Eq. 17 and since  $c_t \leq 1$ , by the fact that  $C_{\text{bound}}$  is monotonously increasing with respect to  $t$ , we have that for any phase  $\phi$ ,

$$\begin{aligned} C_{1 \rightarrow \kappa_*}^{(\phi)} &\leq k^{(\phi)} \tilde{B}^{(\phi)} + 3x \left( \tilde{B}^{(\phi)} \sqrt{SAk^{(\phi)}} \log_2 \left( \frac{2\tilde{B}^{(\phi)} t^{(\phi)} SA}{\delta} \right) + \tilde{B}^{(\phi)} S^2 A \log_2 \left( \frac{2\tilde{B}^{(\phi)} t^{(\phi)} SA}{\delta} \right) \right) + 1 \\ &\leq \kappa_* (2B_*) + 3x \left( (2B_*) \sqrt{SA\kappa_*} \log_2 \left( \frac{2(2B_*) TSA}{\delta} \right) + (2B_*) S^2 A \log_2 \left( \frac{2(2B_*) TSA}{\delta} \right) \right) + 1 \\ &\leq O \left( B_*^3 S^3 A + B_*^2 S^2 A \log \left( \frac{B_* TSA}{\delta} \right) + B_* S^2 A \log^2 \left( \frac{B_* TSA}{\delta} \right) \right). \end{aligned}$$

In addition, we recall that  $\Phi \leq \lceil \log_2(B_*) \rceil + 1$ . Hence, by plugging in the definition of  $\kappa_*$ , we can bound the cost (and thus the regret) accumulated over the episodes  $k < \kappa_*$  as follows

$$\begin{aligned} R_{1 \rightarrow \kappa_*} &\leq C_{1 \rightarrow \kappa_*} \leq \sum_{\phi=1}^{\lceil \log_2(B_*) \rceil + 1} O \left( B_*^3 S^3 A + B_*^2 S^2 A \log \left( \frac{B_* TSA}{\delta} \right) + B_* S^2 A \log^2 \left( \frac{B_* TSA}{\delta} \right) \right) \\ &\leq O \left( B_*^3 S^3 A \log(B_*) + B_*^2 S^2 A \log \left( \frac{B_* TSA}{\delta} \right) \log(B_*) \right. \\ &\quad \left. + B_* S^2 A \log^2 \left( \frac{B_* TSA}{\delta} \right) \log(B_*) \right) \\ &\leq O \left( B_*^3 S^3 A \bar{l} + B_*^2 S^2 A \bar{l}^2 + B_* S^2 A \bar{l}^3 \right). \end{aligned}$$

## ② Regret contribution in the second regime (i.e., episodes $k \geq \kappa_*$ ).

We denote respectively by  $R_{\kappa_* \rightarrow K}$  and  $C_{\kappa_* \rightarrow K}$  the cumulative regret and the cumulative cost incurred during the episodes  $k \geq \kappa_*$ . By definition of  $\kappa_*$ , the episode-driven increment of  $\tilde{B}$  ensures that  $\tilde{B} \geq B_*$ . During this second regime there may be at most two phases: one that started at an episode  $k < \kappa_*$  (i.e., in the first regime) and that overlaps the two regimes, and one starting after that (note that properties 1 and 2 ensure that at this point neither halting condition can end this phase since it started with estimate  $\tilde{B} \geq B_*$ , thus it lasts until the end of the learning interaction). In addition, we can upper bound  $\tilde{B}$  as follows

$$\tilde{B} \leq \max \left\{ 2B_*, \frac{2\sqrt{K}}{S^{3/2} A^{1/2}} \right\}.$$

We now introduce a fourth condition of stopping an interval to the analysis performed in Sect. D.3: (4) an interval ends when a subroutine PHASE ends. This implies that the policy always stays the same within an interval when running Alg. 2. Condition (4) is met at most once in the second regime.

We now focus on only the second regime: we re-index intervals by  $1, 2, \dots, M'$  and let  $T_m$  denote the time step counting from the beginning of  $\kappa_*$  to the end of interval  $m$ . To bound  $R_{\kappa_* \rightarrow K}$ , we need to adapt the proofs in App. D.5 and App. E.3 to be compatible with our new interval decomposition. Concretely, there are two slight modifications in the analysis of the second regime:

- Statistics: For any statistic (i.e.,  $N(s, a, s')$ ,  $\theta(s, a)$  and  $\hat{c}(s, a)$  for any  $(s, a, s') \in \mathcal{S} \times \mathcal{A} \times \mathcal{S}'$ ), instead of learning from scratch, PHASE reuses all samples collected thus far. This difference does not affect the regret bound and the probability, since it can be viewed by taking a partial sum of terms in  $\tilde{R}_{M'}$ .

- The regret decomposition: In the proof of Lem. 22, we need to incorporate condition (4) which is met at most once during the second regime. It falls into case (ii) in the proof of Lem. 22, which thus happens at most  $2SA \log_2(T_{M'}) + 1$  times, and the regret decomposition should be

$$\tilde{R}_{M'} \leq X_1(M') + X_2(M') + X_3(M') + 2B_*SA \log_2(T_{M'}) + B_*.$$

Hence by incorporating these slight modifications in the proof of Thm. 3, we get probability at least  $1 - \delta$ ,

$$\begin{aligned} R_{\kappa_* \rightarrow K} &\leq O\left(B_*\sqrt{SAK} \log\left(\frac{B_*TSA}{\delta}\right) + S^2A\tilde{B}_{M'} \log^2\left(\frac{B_*TSA}{\delta}\right)\right) \\ &\leq O\left(B_*\sqrt{SAK} \log\left(\frac{B_*TSA}{\delta}\right) + S^2A \frac{\sqrt{K}}{S^{3/2}A^{1/2}} \log^2\left(\frac{B_*TSA}{\delta}\right)\right) \\ &\leq O\left(B_*\sqrt{SAK}\bar{\iota} + \sqrt{SAK}\bar{\iota}^2\right). \end{aligned}$$

### ③ Combining the regret contributions in the two regimes.

The overall regret is bounded with probability at least  $1 - \delta$  by

$$R_K = R_{1 \rightarrow \kappa_*} + R_{\kappa_* \rightarrow K} \leq O\left(B_*\sqrt{SAK}\bar{\iota} + \sqrt{SAK}\bar{\iota}^2 + B_*^3S^3A\bar{\iota} + B_*^2S^2A\bar{\iota}^2 + B_*S^2A\bar{\iota}^3\right).$$

There remains to plug in the definition of  $\bar{\iota}$ . Denote by  $T$  the cumulative time within the  $K$  episodes and by  $R_K^*$  the regret after  $K$  episodes of EB-SSP in the case of known  $B_*$  (i.e., the bound of Thm. 3 with  $B = B_*$ ). Then with probability at least  $1 - \delta$  the regret of parameter-free EB-SSP can be bounded as

$$\begin{aligned} R_K &= O\left(R_K^* + \sqrt{SAK} \log^2\left(\frac{B_*SAT}{\delta}\right) + B_*^3S^3A \log^3\left(\frac{B_*SAT}{\delta}\right)\right) \\ &= O\left(R_K^* \log\left(\frac{B_*SAT}{\delta}\right) + B_*^3S^3A \log^3\left(\frac{B_*SAT}{\delta}\right)\right). \end{aligned}$$

This concludes the proof of Thm. 9.

**Remark 4.** At a high level, our analysis to circumvent the knowledge of  $B_*$  boils down to the following argument: if the estimate is too small, we bound the regret by the cumulative cost; otherwise if it is large enough, we recover the regret bound under a known upper bound on  $B_*$ . Interestingly, this somewhat resembles the reasoning behind the schemes for unknown SSP-diameter  $D$  in the adversarial SSP algorithms of Rosenberg and Mansour [2021, App. I] and Chen and Luo [2021, App. E] (recall that  $D := \max_{s \in \mathcal{S}} \min_{\pi \in \Pi_{\text{proper}}} T^\pi(s)$  and that  $B_* \leq D \leq T_*$ ). Note however that these schemes change their algorithms' structure: whenever the agent is in a state that is insufficiently visited, it executes the Bernstein-SSP algorithm of Rosenberg et al. [2020] with unit costs until the goal is reached. In other words, these schemes first learn to reach the goal (regardless of the costs) and then focus on minimizing the costs to goal. In contrast, our scheme for unknown  $B_*$  targets the original SSP objective from the start and it does *not* fundamentally alter our algorithm EB-SSP with known  $B_*$ . Indeed, the only addition of parameter-free EB-SSP is a *dual tracking* of the cumulative costs and VISGO ranges, and a *careful increment* of the estimate  $\tilde{B}$  in the bonus. Finally, our scheme only adds “horizon-free” lower-order terms (i.e.,  $B_*, S, A$ ) as shown in Thm. 9, as opposed to the aforementioned schemes that introduce a lower-order dependence on the SSP-diameter  $D$ , which may be much larger than  $B_*$ .

---

**Algorithm 2:** Algorithm for unknown  $B_*$ : Parameter-free EB-SSP

---

```
1 Input:  $\mathcal{S}$ ,  $s_0 \in \mathcal{S}$ ,  $g \notin \mathcal{S}$ ,  $\mathcal{A}$ ,  $\delta$ .
2 Optional input: cost perturbation  $\eta \in [0, 1]$ .
3 Set up global constants:  $\mathcal{S}$ ,  $\mathcal{A}$ ,  $s_0 \in \mathcal{S}$ ,  $g \notin \mathcal{S}$ ,  $\eta$ .
4 Set up global variables:  $t$ ,  $j$ ,  $N()$ ,  $n()$ ,  $\hat{P}$ ,  $\theta()$ ,  $\hat{c}()$ ,  $Q()$ ,  $V()$ .
5 Set estimate  $\tilde{B} \leftarrow 1$ .
6 Set current starting state  $s_{\text{start}} \leftarrow s_0$ .
7 Set  $t \leftarrow 1$ ,  $k \leftarrow 1$ ,  $j \leftarrow 0$ .
8 For  $(s, a, s') \in \mathcal{S} \times \mathcal{A} \times \mathcal{S}'$ , set  $N(s, a) \leftarrow 0$ ;  $n(s, a) \leftarrow 0$ ;  $N(s, a, s') \leftarrow 0$ ;  $\hat{P}_{s, a, s'} \leftarrow 0$ ;  $\theta(s, a) \leftarrow 0$ ;  $\hat{c}(s, a) \leftarrow 0$ ;  $Q(s, a) \leftarrow 0$ ;  $V(s) \leftarrow 0$ .
9 Set phase counter  $\phi \leftarrow 1$ .
10 while True do
11   Set  $s_{\text{cur}}$ ,  $\tilde{B}_{\text{cur}}$ ,  $k_{\text{cur}} \leftarrow \text{PHASE}(s_{\text{start}}, \tilde{B}, k)$  (Alg. 3).
12    $\backslash\backslash$  PHASE halts because of  $B_*$  underestimation, entering a new phase
13   Set  $s_{\text{start}} \leftarrow s_{\text{cur}}$ ,  $k \leftarrow k_{\text{cur}}$ ,  $\tilde{B} \leftarrow 2\tilde{B}_{\text{cur}}$ , and increment phase index  $\phi \leftarrow \phi + 1$ .
```

---

---

**Algorithm 3:** Subroutine PHASE

---

```
1 Input:  $s_{\text{start}} \in \mathcal{S}$ ,  $\tilde{B}$ ,  $k$ .
2 Global constants:  $\mathcal{S}$ ,  $\mathcal{A}$ ,  $s_0 \in \mathcal{S}$ ,  $g \notin \mathcal{S}$ ,  $\eta$ .
3 Global variables:  $t$ ,  $j$ ,  $N()$ ,  $n()$ ,  $\hat{P}$ ,  $\theta()$ ,  $\hat{c}()$ ,  $Q()$ ,  $V()$ .
4 Specify: Trigger set  $\mathcal{N} \leftarrow \{2^{j-1} : j = 1, 2, \dots\}$ . Constants  $c_1 = 6$ ,  $c_2 = 36$ ,  $c_3 = 2\sqrt{2}$ ,  $c_4 = 2\sqrt{2}$ .
   Large enough absolute constant  $x > 0$  (so that Eq. 15 holds, see App. H.3).
5 Set  $C \leftarrow 0$ .  $\backslash\backslash$  Reinitialize cumulative cost tracker
6 for episode  $k_{\text{cur}} = k, k + 1, \dots$  do
7   if  $\sqrt{k_{\text{cur}}}/(S^{3/2}A^{1/2}) > \tilde{B}$  then
8     Set  $\tilde{B} \leftarrow \sqrt{k_{\text{cur}}}/(S^{3/2}A^{1/2})$ , and set  $j \leftarrow j + 1$ ,  $\epsilon_{\text{VI}} \leftarrow 2^{-j}/(SA)$ .
9     Info,  $Q$ ,  $V \leftarrow \text{VISGO}(\tilde{B}, \epsilon_{\text{VI}})$ .
10    if Info = Fail then
11       $\backslash\backslash$  Second halting condition: VISGO range exceeds threshold
12      return  $s_t$ ,  $\tilde{B}$ ,  $k_{\text{cur}}$ .
13    Set  $s_t \leftarrow \begin{cases} s_{\text{start}}, & k_{\text{cur}} = k, \\ s_0, & \text{otherwise.} \end{cases}$ 
14    while  $s_t \neq g$  do
15      Take action  $a_t = \arg \min_{a \in \mathcal{A}} Q(s_t, a)$ , incur cost  $c_t$  and observe next state  $s_{t+1} \sim P(\cdot | s_t, a_t)$ .
16      Set  $(s, a, s', c) \leftarrow (s_t, a_t, s_{t+1}, \max\{c_t, \eta\})$  and  $t \leftarrow t + 1$ .
17      Set  $N(s, a) \leftarrow N(s, a) + 1$ ,  $\theta(s, a) \leftarrow \theta(s, a) + c$ ,  $C \leftarrow C + c$ ,  $N(s, a, s') \leftarrow N(s, a, s') + 1$ ,
      and set
      
$$C_{\text{bound}} \leftarrow k_{\text{cur}}\tilde{B} + 3x \left( \tilde{B}\sqrt{SAk_{\text{cur}}} \log_2 \left( \frac{2\tilde{B}tSA}{\delta} \right) + \tilde{B}S^2A \log_2^2 \left( \frac{2\tilde{B}tSA}{\delta} \right) \right). \quad (17)$$

18      if  $C > C_{\text{bound}}$  then
19         $\backslash\backslash$  First halting condition: cumulative cost exceeds threshold
20        return  $s_t$ ,  $\tilde{B}$ ,  $k_{\text{cur}}$ .
21      if  $N(s, a) \in \mathcal{N}$  then
22        Set  $\hat{c}(s, a) \leftarrow \mathbb{I}[N(s, a) \geq 2] \frac{2\theta(s, a)}{N(s, a)} + \mathbb{I}[N(s, a) = 1]\theta(s, a)$  and  $\theta(s, a) \leftarrow 0$ .
23        For all  $s' \in \mathcal{S}$ , set  $\hat{P}_{s, a, s'} \leftarrow N(s, a, s')/N(s, a)$ ,  $n(s, a) \leftarrow N(s, a)$ , and set
         $j \leftarrow j + 1$ ,  $\epsilon_{\text{VI}} \leftarrow 2^{-j}/(SA)$ .
24        Info,  $Q$ ,  $V \leftarrow \text{VISGO}(\tilde{B}, \epsilon_{\text{VI}})$ .
25        if Info = Fail then
26           $\backslash\backslash$  Second halting condition: VISGO range exceeds threshold
27          return  $s_t$ ,  $\tilde{B}$ ,  $k_{\text{cur}}$ .
```

---



---

**Algorithm 4:** Subroutine VISGO
 

---

- 1 **Inputs:**  $\tilde{B}$ ,  $\epsilon_{VI}$ .
- 2 **Global constants:**  $\mathcal{S}$ ,  $\mathcal{A}$ ,  $s_0 \in \mathcal{S}$ ,  $g \notin \mathcal{S}$ ,  $\eta$ .
- 3 **Global variables:**  $t$ ,  $j$ ,  $N(\cdot)$ ,  $n(\cdot)$ ,  $\tilde{P}$ ,  $\theta(\cdot)$ ,  $\tilde{c}(\cdot)$ ,  $Q(\cdot)$ ,  $V(\cdot)$ .
- 4 For all  $(s, a, s') \in \mathcal{S} \times \mathcal{A} \times \mathcal{S}'$ , set

$$\tilde{P}_{s,a,s'} \leftarrow \frac{n(s,a)}{n(s,a)+1} \hat{P}_{s,a,s'} + \frac{\mathbb{I}[s'=g]}{n(s,a)+1}.$$

- 5 For all  $(s, a) \in \mathcal{S} \times \mathcal{A}$ , set  $n^+(s, a) \leftarrow \max\{n(s, a), 1\}$ ,  $\iota_{s,a} \leftarrow \ln\left(\frac{12SAS'[n^+(s,a)]^2}{\delta}\right)$ .
  - 6 Set  $i \leftarrow 0$ ,  $V^{(0)} \leftarrow 0$ ,  $V^{(-1)} \leftarrow +\infty$ .
  - 7 **while**  $\|V^{(i)} - V^{(i-1)}\|_\infty > \epsilon_{VI}$  **do**
  - 8     For all  $(s, a) \in \mathcal{S} \times \mathcal{A}$ , set
    - $b^{(i+1)}(s, a) \leftarrow \max\left\{c_1 \sqrt{\frac{\mathbb{V}(\tilde{P}_{s,a}, V^{(i)})\iota_{s,a}}{n^+(s,a)}}, c_2 \frac{\tilde{B}\iota_{s,a}}{n^+(s,a)}\right\} + c_3 \sqrt{\frac{\tilde{c}(s,a)\iota_{s,a}}{n^+(s,a)}} + c_4 \frac{\tilde{B}\sqrt{S'\iota_{s,a}}}{n^+(s,a)},$  (18)
    - $Q^{(i+1)}(s, a) \leftarrow \max\{\tilde{c}(s, a) + \tilde{P}_{s,a}V^{(i)} - b^{(i+1)}(s, a), 0\},$  (19)
    - $V^{(i+1)}(s) \leftarrow \min_a Q^{(i+1)}(s, a).$  (20)
  - 9     Set  $V^{(i+1)}(g) \leftarrow 0$  and  $i \leftarrow i + 1$ .
  - 10    **if**  $\|V^{(i)}\|_\infty > \tilde{B}$  **then**
  - 11      $\backslash\backslash$  *Second halting condition: VISGO range exceeds threshold*
  - 12     **return** Fail,  $Q^{(i)}$ ,  $V^{(i)}$ .
  - 13 **return** Success,  $Q^{(i)}$ ,  $V^{(i)}$ .
-
